# Supplementary material for: Covalent cell surface recruitment of chemotherapeutic polymers enhances selectivity and activity
Source: Royal Society of Chemistry journal article supplement (doi:10.1039/d0sc06580c), 2021-01-01
Supplement: d0sc06580c1.pdf [file d0sc06580c1.pdf]

## Supporting Information

### **Covalent Cell Surface Recruitment of Chemotherapeutic Polymers Enhances Selectivity and Activity**

Ruben M. F. Tomás<sup>a,c</sup> and Matthew I. Gibson<sup>a,b\*</sup>

<sup>a</sup> *Department of Chemistry, University of Warwick, Gibbet Hill Road, Coventry, CV4 7AL, UK;*

<sup>b</sup> *Warwick Medical School, University of Warwick, Gibbet Hill Road, Coventry, CV4 7AL, UK;*

<sup>c</sup> *MAS CDT, Senate House, University of Warwick, Coventry CV4 7AL*

\*Corresponding Author [m.i.gibson@warwick.ac.uk](mailto:m.i.gibson@warwick.ac.uk)

# 1 Experimental

## 1.1 Materials

2-(Dimethylamino)ethyl methacrylate (DMAEMA), 4,4'-azobis(4-cyanovaleric acid) (ACVA), dioxane, hexane, tetrahydrofuran (THF), mesitylene, dibenzocyclooctyne-amine (DBCO-NH<sub>2</sub>), propyl amine, N-(5-fluoresceinyl)maleimide ( $\geq 90\%$ , HPLC grade), chloroform-d (CDCl<sub>3</sub>, 99.8%), doxorubicin hydrochloride (98%), Triton X-100 and sucrose were purchased from Sigma Aldrich Co Ltd (Gillingham, UK). Dulbecco phosphate buffered saline (DPBS), N-azidoacetylmannosamine-tetraacylated (Ac<sub>4</sub>ManNAz), NucBlue® Live Cell ReadyProbes® Reagent, alamarBlue™ Cell Viability Reagent, LIVE/DEAD™ Viability/Cytotoxicity Kit for mammalian cells, CellEvent Caspase-3/7 Detection Reagent, CellMask™ Deep Red Plasma membrane stain, Molecular Probes™ Dead Cell Apoptosis Kit with Annexin V FITC and PI, Thermo Scientific™ Pierce™ LDH Cytotoxicity Assay Kit, sodium hydroxide, magnesium chloride and Tris-HCl were purchased from Fisher Scientific (Loughborough, UK). CellTox™ Green Cytotoxicity Assay and CellTiter-Glo® 3D Luminescent Cell Viability Assay were purchased from Promega (Wisconsin, USA). CELLview™ Culture dish, 35 mm, TC treated, 4 compartments were purchased from Greiner Bio-One (Stonehouse, UK). Ovine blood was purchased from TCS Biosciences (Buckingham, UK). All reagents were used as purchased, without further purification.

## 1.2 Physical and Analytical Methods

**Size Exclusion Chromatography (SEC).** An Agilent Infinity II MDS instrument equipped with differential refractive index (DRI), viscometry (VS), dual-angle light scatter (LS) and variable wavelength UV-Vis detectors (set at 494 nm) was used for all SEC analysis. The system was fitted with 2 x PLgel Mixed D columns (300 x 7.5 mm) and a PLgel 5  $\mu$ m guard column. The

eluent utilised was DMF with 5 mmol  $\text{NH}_4\text{BF}_4$  additive at a flow rate of  $1.0 \text{ mL} \cdot \text{min}^{-1}$  at  $50^\circ\text{C}$ . Poly(methyl methacrylate) standards (Agilent EasyVials) were used for calibration between  $955,000 - 550 \text{ g} \cdot \text{mol}^{-1}$ . Samples were prepared in the mobile phase and passed through a nylon membrane with  $0.22 \mu\text{m}$  pore size prior to injection. Agilent GPC/SEC Software was used to determine experimental molar mass ( $M_{n,\text{exp}}$ ), experimental molecular weight ( $M_{w,\text{exp}}$ ) and dispersity ( $\text{Đ}$ ) of synthesized polymers.

**Nuclear Magnetic Resonance (NMR) Spectroscopy.**  $^1\text{H}$  and  $^{19}\text{F}$  NMR spectra were recorded on a Bruker HD-300 spectrometer and  $^{13}\text{C}$  NMR spectra on a Bruker HD-400 spectrometer, both operating at 293 K using deuterated solvents purchased from Sigma-Aldrich. Chemical shifts were reported as  $\delta$  in parts per million (ppm) relative to residual non-deuterated solvent resonances ( $\text{CDCl}_3$   $^1\text{H}$ :  $\delta = 7.26 \text{ ppm}$ ;  $^{13}\text{C}$   $\delta = 77.16 \text{ ppm}$ ). Polymer compositions and monomer conversions were determined using spectra obtained. Bruker Topspin 3.5 Software was used to process and export spectra.

**Infrared (IR) Spectroscopy.** FTIR spectra were acquired using an Agilent Cary 630 FTIR (Agilent Technologies, Connecticut, USA) spectrometer equipped with a single reflection diamond ATR accessory with a  $45^\circ$  angle of incidence, a 1 mm diameter sampling surface ( $200 \mu\text{m}$  active area) and a rotating pressure clamp (applying maximum pressure). Scans (128) were obtained of dried, crushed samples between  $4000 - 650 \text{ cm}^{-1}$  with a spectral resolution:  $< 2 \text{ cm}^{-1}$ , wavenumber accuracy of  $0.05 \text{ cm}^{-1}$  and wavenumber reproducibility of  $0.005 \text{ cm}^{-1}$ . Gain, aperture, scan speed and filter were all set to auto. Agilent MicroLab Software, version B.05.4, was used to process and export spectra.

**Confocal Microscopy.** Confocal imaging was completed using a Zeiss LSM 880 inverted microscope with 100x, 63x, 40x and 20x oil immersion objective lenses, equipped with three photomultiplier detectors (GaAsP, multialkali and BiG.2) and multichannel spectral imaging

with an ultra-sensitive GASP detector. The UV and VIS Laser Modules allowed selection of six lasers with wavelengths of 633, 594, 561, 543, 514, 488, 458 and 405 nm. Zeiss ZEN (black edition) 2.3 lite was utilised for image collection and processing. All other imaging was completed using an Olympus CX41 microscope equipped with a UIS-2 20x/0.45/ $\infty$ /0–2/FN22 lens (Olympus Ltd., Southend-on-Sea, U.K.) and a Canon EOS 500D SLR digital camera.

**UV-Vis Spectroscopy.** An Agilent Technologies Cary 60 Variable Temperature UV-Vis spectrometer was used to record absorbance measurements of DBCO-DMAEMA<sub>100/150</sub>-Fl polymers, for polymer: dye ratio calculations, between 300 and 800 nm at a scan rate of 600 nm.min<sup>-1</sup> and 1 nm data interval. Dual beam mode was used and the system was operated using Agilent software.

**Statistical Analysis.** Data was analysed with a one-way analysis of variance (ANOVA) on ranks followed by a comparison of experimental groups with the appropriate control group (Tukey's post hoc test). GraphPad Prism 8 (La Jolla, California, USA) was used for all statistical analysis including the plotting and determination of EC<sub>50</sub> and EC<sub>90</sub> values.

### 1.3 General Cell Culture

**Cell Lines.** Human Caucasian lung carcinoma cells (A549, Cat. No. 86012804), human Caucasian Dukes' type B, colorectal adenocarcinoma cells (SW480, Cat. No. 87092801), and human Caucasian breast adenocarcinoma derived from metastatic site (MCF-7, Cat. No. 86012803) were obtained from European Collection of Authenticated Cell Cultures (Public Health England, UK).

**Cell Culture.** A549 cells were grown in 175 cm<sup>2</sup> Nunc cell culture flasks (ThermoFisher, Rugby, UK) with Ham's F-12K (Kaighn's) Medium (F-12K) (Gibco, Paisley, UK) supplemented with 10% USA-origin fetal bovine serum (FBS) purchased from Sigma Aldrich (Dorset, UK), 100 units.mL<sup>-1</sup> penicillin, 100  $\mu$ g.mL<sup>-1</sup> streptomycin, and 250 ng.mL<sup>-1</sup>



amphotericin B (PSA) (HyClone, Cramlington, UK). SW480 cells were grown in 75 cm<sup>2</sup> Nunc cell culture flasks (ThermoFisher, Rugby, UK) with Gibco™ Advanced Dulbecco's Modified Eagle's Medium (Gibco, Paisley, UK) supplemented with 10% FBS, 100 units.mL<sup>-1</sup> penicillin, 100 µg.mL<sup>-1</sup> streptomycin, and 250 ng.mL<sup>-1</sup> amphotericin B. MCF-7 cells were grown in 75 cm<sup>2</sup> Nunc cell culture flasks with Dulbecco's Modified Eagle's Medium - high glucose (Gibco, Paisley, UK) supplemented with 10% FBS, 100 units.mL<sup>-1</sup> penicillin, 100 µg.mL<sup>-1</sup> streptomycin, and 250 ng.mL<sup>-1</sup> amphotericin B. General maintenance of all cell lines was completed by passaging every 3 – 4 days, before reaching 70 – 80% confluency. Cells were dissociated using a balanced salt solution containing trypsin (0.25%) and EDTA (1 mM) (Gibco) and reseeded in 175/75 cm<sup>2</sup> cell culture flasks at appropriate seeding densities. All azido sugar and polymer solutions were prepared in the respective cell media.

#### 1.4 Synthesis of Azide-Reactive Chemotherapeutic Polymers

##### *General Procedure for Polymerisation of 2-(Dimethylamino)ethyl Methacrylate*

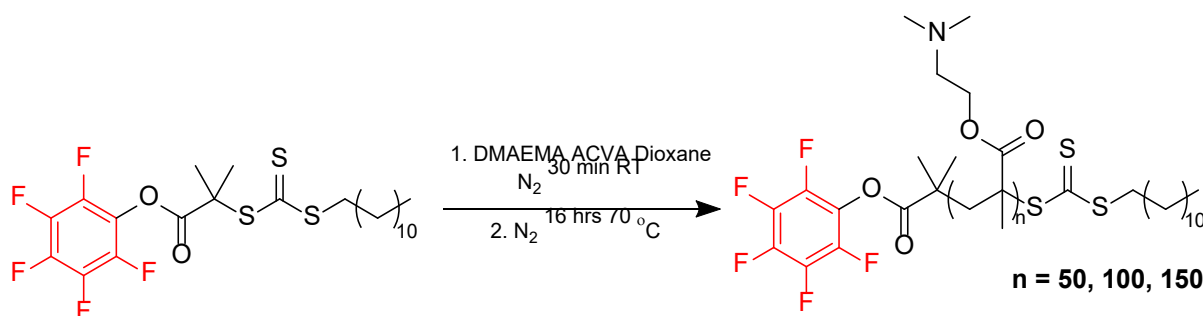

**Figure S1.** Polymerisation of 2-(dimethylamino)ethyl methacrylate using PFP-DMP.

2-(Dodecylthiocarbonothioylthio)-2-methylpropionic acid pentafluorophenyl ester (PFP-DMP) was synthesised as previously described.<sup>1-3</sup> 2-(Dimethylamino)ethyl methacrylate DMAEMA (2.00 g, 12.7 mmol), PFP-DMP and 4,4'-azobis(4-cyanovaleric acid) (ACVA) were dissolved in dioxane (10 mL) at ratios presented in Table S1 to obtain 3 degrees of polymerisation (DP). Mesitylene (150 µL) was used as an internal reference and an aliquot was

taken in CDCl<sub>3</sub> for NMR analysis. The reaction mixture was stirred under N<sub>2</sub> for 30 min at RT and a further 16 h at 70 °C. An aliquot of the post-reaction mixture was taken for NMR analysis in CDCl<sub>3</sub>, allowing percentage conversion calculations. The polymer was reprecipitated into hexane from THF three times, yielding a yellow polymer product. The resulting product was dried under vacuum and an aliquot was taken for NMR analysis in CDCl<sub>3</sub>. NMR percentage conversion and SEC results are presented in Table S1.

**Table S1.** SEC results of PFP-*p*DMAEMA<sub>*n*</sub>.

| Polymer                             | [M]:[CTA]<br>(–) | %Conv. <sup>a</sup> | <i>M</i> <sub>n,th</sub> <sup>b</sup><br>(g.mol <sup>-1</sup> ) | <i>M</i> <sub>n,exp</sub> <sup>c</sup><br>(g.mol <sup>-1</sup> ) | <i>M</i> <sub>w,exp</sub> <sup>c</sup><br>(g.mol <sup>-1</sup> ) | <i>Đ</i> <sup>c</sup> |
|-------------------------------------|------------------|---------------------|-----------------------------------------------------------------|------------------------------------------------------------------|------------------------------------------------------------------|-----------------------|
| PFP- <i>p</i> DMAEMA <sub>50</sub>  | 50               | 91                  | 7683                                                            | 12100                                                            | 14600                                                            | 1.21                  |
| PFP- <i>p</i> DMAEMA <sub>100</sub> | 100              | 95                  | 15465                                                           | 17700                                                            | 21500                                                            | 1.21                  |
| PFP- <i>p</i> DMAEMA <sub>150</sub> | 150              | 93                  | 22461                                                           | 24300                                                            | 29200                                                            | 1.20                  |

<sup>a</sup> Determined by <sup>1</sup>H NMR against an internal mesitylene standard.

<sup>b</sup> Determined by the [M]:[CTA] ratio and conversion, assuming 100% CTA efficiency.

<sup>c</sup> Determined by SEC in DMF against PMMA standards.

*PFP-pDMAEMA*<sub>50</sub>: <sup>1</sup>H NMR (300 MHz, CDCl<sub>3</sub>) δ<sub>ppm</sub>: 4.06 ppm (100H, s, **CH<sub>2</sub>-O**); 2.57 ppm (100H, br. s, **CH<sub>2</sub>-N**); 2.28 ppm (302H, s, N-(**CH<sub>3</sub>**)<sub>2</sub>, **H<sup>12</sup>**); 2.08-1.70 ppm (106H, multiple br. s, **backbone CH<sub>2</sub>** and **H<sup>13-14</sup>**); 1.40-1.20 ppm (20H, br. s, **H<sup>2-11</sup>**); 1.13-0.774 ppm (153H, **backbone CH<sub>3</sub>**, **H<sup>1</sup>**). Solvent peaks: 3.75 ppm and 1.83 ppm (m, THF) solvent peak and 7.26 ppm (s, CDCl<sub>3</sub>). <sup>19</sup>F NMR (300 MHz, CDCl<sub>3</sub>) δ<sub>ppm</sub>: -152.5 ppm (2F, d, J<sub>1-2</sub> = 18.6 Hz, **F<sup>1</sup>**, **ortho**); -158.0 ppm (1F, t, J<sub>1-2</sub> = 22.8 Hz, **F<sup>3</sup>**, **para**); -162.3 ppm (2F, t, J<sub>1-2</sub> = 20.5 Hz, **F<sup>2</sup>**, **meta**). <sup>13</sup>C NMR (400 MHz, CDCl<sub>3</sub>) δ<sub>ppm</sub>: 63.1 ppm (**CH<sub>2</sub>-O**), 57.2 ppm (**CH<sub>2</sub>-N**), 45.7 ppm (N-(**CH<sub>3</sub>**)<sub>2</sub>) and 44.8 ppm (**backbone quaternary C**). Solvent peaks: 77.04 ppm (t, CDCl<sub>3</sub>). IR ν / cm<sup>-1</sup>: 3025 - 2689 cm<sup>-1</sup> (w, C-H stretch); 2820 cm<sup>-1</sup> (w, asym. C-H stretch (N-CH<sub>3</sub>)); 2768 cm<sup>-1</sup> (w, sym. C-H stretch (N-CH<sub>3</sub>)); 1724 cm<sup>-1</sup> (s, C=O stretch); 1522 cm<sup>-1</sup> (w, C-F stretch); 1455 cm<sup>-1</sup> (m, C-H bend (CH<sub>2</sub>)), 1171 cm<sup>-1</sup> (s, C-O stretch); 1144 cm<sup>-1</sup> (s, C-N stretch), and 1062 cm<sup>-1</sup> (w, S-(C=S)-S stretch).

*PFP-pDMAEMA<sub>100</sub>*:  $^1\text{H}$  NMR (300 MHz,  $\text{CDCl}_3$ )  $\delta_{\text{ppm}}$ :  $^1\text{H}$  NMR (300 MHz,  $\text{CDCl}_3$ )  $\delta_{\text{ppm}}$ : 4.05 ppm (200H, s,  $\text{CH}_2\text{-O}$ ); 2.56 ppm (200H, br. s,  $\text{CH}_2\text{-N}$ ); 2.28 ppm (602H, s,  $\text{N-(CH}_3)_2$ ,  $\text{H}^{12}$ ); 2.09-1.70 ppm (206H, multiple br. s, **backbone  $\text{CH}_2$**  and  $\text{H}^{13-14}$ ); 1.40-1.19 ppm (20H, br. s,  $\text{H}^{2-11}$ ); 1.14-0.774 ppm (303H, **backbone  $\text{CH}_3$** ,  $\text{H}^1$ ). Solvent peaks: 3.75 ppm and 1.85 ppm (m, THF) solvent peak and 7.27 ppm (s,  $\text{CDCl}_3$ ).  $^{13}\text{C}$  NMR (400 MHz,  $\text{CDCl}_3$ )  $\delta_{\text{ppm}}$ : 63.1 ppm ( $\text{CH}_2\text{-O}$ ), 57.2 ppm ( $\text{CH}_2\text{-N}$ ), 45.7 ppm ( $\text{N-(CH}_3)_2$ ) and 44.8 ppm (**backbone quaternary C**). Solvent peaks: 77.04 ppm (t,  $\text{CDCl}_3$ ).  $^{19}\text{F}$  NMR (300 MHz,  $\text{CDCl}_3$ )  $\delta_{\text{ppm}}$ : -152.5 ppm (2F, d,  $J_{1-2} = 17.4$  Hz,  $\text{F}^1$ , **ortho**); -158.0 ppm (1F, t,  $J_{1-2} = 22.5$  Hz,  $\text{F}^3$ , **para**); -162.3 ppm (2F, t,  $J_{1-2} = 20.1$  Hz,  $\text{F}^2$ , **meta**). IR  $\nu / \text{cm}^{-1}$ : 3027 - 2693  $\text{cm}^{-1}$  (w, C-H stretch); 2821  $\text{cm}^{-1}$  (w, asym. C-H stretch ( $\text{N-CH}_3$ )); 2770  $\text{cm}^{-1}$  (w, sym. C-H stretch ( $\text{N-CH}_3$ )); 1724  $\text{cm}^{-1}$  (s, C=O stretch); 1522  $\text{cm}^{-1}$  (w, C-F stretch); 1456  $\text{cm}^{-1}$  (m, C-H bend ( $\text{CH}_2$ )). 1172  $\text{cm}^{-1}$  (s, C-O stretch); 1145  $\text{cm}^{-1}$  (s, C-N stretch), 1063  $\text{cm}^{-1}$  (w, S-(C=S)-S stretch), 915  $\text{cm}^{-1}$  (w,  $\text{C}_5\text{F}_6$  associated vibration).

*PFP-pDMAEMA<sub>150</sub>*:  $^1\text{H}$  NMR (300 MHz,  $\text{CDCl}_3$ )  $\delta_{\text{ppm}}$ :  $^1\text{H}$  NMR (300 MHz,  $\text{MeOD}$ )  $\delta_{\text{ppm}}$ :  $^1\text{H}$  NMR (300 MHz,  $\text{CDCl}_3$ )  $\delta_{\text{ppm}}$ : 4.06 ppm (300H, s,  $\text{CH}_2\text{-O}$ ); 2.56 ppm (300H, br. s,  $\text{CH}_2\text{-N}$ ); 2.28 ppm (902H, s,  $\text{N-(CH}_3)_2$ ,  $\text{H}^{12}$ ); 2.09-1.72 ppm (306H, multiple br. s, **backbone  $\text{CH}_2$**  and  $\text{H}^{13-14}$ ); 1.38-1.20 ppm (20H, br. s,  $\text{H}^{2-11}$ ); 1.14-0.772 ppm (453H, **backbone  $\text{CH}_3$** ,  $\text{H}^1$ ). Solvent peaks: 3.75 ppm and 1.85 ppm (m, THF) solvent peak and 7.27 ppm (s,  $\text{CDCl}_3$ ).  $^{19}\text{F}$  NMR (300 MHz,  $\text{CDCl}_3$ )  $\delta_{\text{ppm}}$ : -152.5 ppm (2F, d,  $J_{1-2} = 18.4$  Hz,  $\text{F}^1$ , **ortho**); -158.0 ppm (1F, t,  $J_{1-2} = 20.7$  Hz,  $\text{F}^3$ , **para**); -162.3 ppm (2F, t,  $J_{1-2} = 20.5$  Hz,  $\text{F}^2$ , **meta**).  $^{13}\text{C}$  NMR (400 MHz,  $\text{CDCl}_3$ )  $\delta_{\text{ppm}}$ : 63.0 ppm ( $\text{CH}_2\text{-O}$ ), 57.2 ppm ( $\text{CH}_2\text{-N}$ ), 45.8 ppm ( $\text{N-(CH}_3)_2$ ) and 44.7 ppm (**backbone quaternary C**). Solvent peaks: 77.04 ppm (t,  $\text{CDCl}_3$ ). IR  $\nu / \text{cm}^{-1}$ : 2972 - 2651  $\text{cm}^{-1}$  (w, C-H stretch); 2821  $\text{cm}^{-1}$  (w, asym. C-H stretch ( $\text{N-CH}_3$ )); 2770  $\text{cm}^{-1}$  (w, sym. C-H stretch ( $\text{N-CH}_3$ )); 1722  $\text{cm}^{-1}$  (s, C=O stretch); 1522  $\text{cm}^{-1}$  (w, C-F stretch); 1456  $\text{cm}^{-1}$  (m, C-H bend ( $\text{CH}_2$ )). 1172  $\text{cm}^{-1}$  (s, C-O stretch); 1144  $\text{cm}^{-1}$  (s, C-N stretch), 1063  $\text{cm}^{-1}$  (w, S-(C=S)-S stretch), 915  $\text{cm}^{-1}$  (w,  $\text{C}_5\text{F}_6$  associated vibration).

## Functionalisation of PFP-pDMAEMA<sub>n</sub> with DBCO-NH<sub>2</sub> and Thiocarbonate Reduction

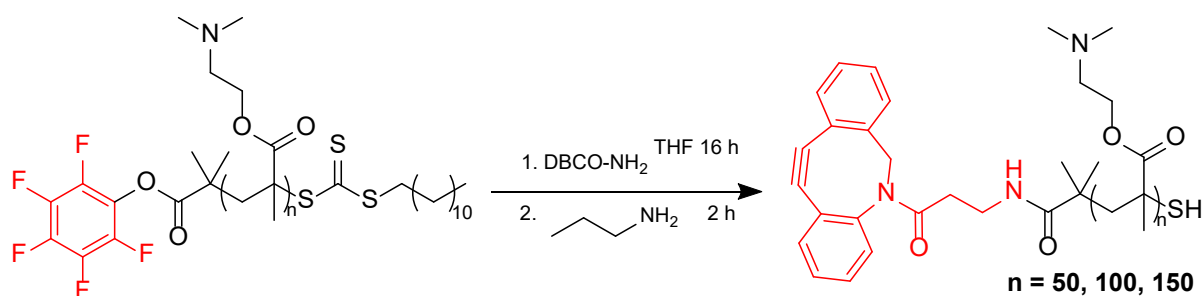

**Figure S2.** Functionalisation of PFP-pDMAEMA<sub>n</sub> with DBCO-NH<sub>2</sub>.

PFP-pDMAEMA<sub>n</sub> (0.20 g, 1 Eq), and dibenzocyclooctyne-amine (DBCO-NH<sub>2</sub>; 2 Eq) were stirred in THF (3 mL) for 16 h. Subsequent addition of propyl amine (1.5 eq) for 2 h was used to ensure complete reduction of the thiocarbonate moiety to a thiol group. The polymer was reprecipitated into cold hexane from THF three times, yielding a white polymer product. The resulting product was dried under vacuum and DMF SEC analysis was completed, Table S2. An aliquot was also taken for NMR analysis in CDCl<sub>3</sub>.

**Table S2.** SEC results of DBCO-pDMAEMA<sub>n</sub>.

| Polymer                     | $M_{n,th}^a$ (g.mol <sup>-1</sup> ) | $M_{n,exp}^b$ (g.mol <sup>-1</sup> ) | $M_{W,exp}^b$ (g.mol <sup>-1</sup> ) | $\bar{D}^b$ |
|-----------------------------|-------------------------------------|--------------------------------------|--------------------------------------|-------------|
| DBCO-pDMAEMA <sub>50</sub>  | 7531                                | 12500                                | 13900                                | 1.11        |
| DBCO-pDMAEMA <sub>100</sub> | 15313                               | 14600                                | 16400                                | 1.12        |
| DBCO-pDMAEMA <sub>150</sub> | 22309                               | 17200                                | 19300                                | 1.12        |

<sup>a</sup> Determined assuming 100% successful DBCO functionalisation.

<sup>b</sup> Determined by SEC in DMF against PMMA standards.

DBCO-pDMAEMA<sub>50</sub>: <sup>1</sup>H NMR (300 MHz, CDCl<sub>3</sub>)  $\delta_{ppm}$ : 7.73-7.31 ppm (8H, br. m, **aromatic DBCO CH**); 5.19-5.11 ppm (DBCO **CH**<sub>2</sub>-N), 4.06 ppm (100H, s, **CH**<sub>2</sub>-O); 2.56 ppm (100H, br. s, **CH**<sub>2</sub>-N); 2.28 ppm (300H, s, N-(**CH**<sub>3</sub>)<sub>2</sub>); 2.12-1.75 ppm (100H, multiple br. s, **backbone CH**<sub>2</sub>); 1.15-0.772 ppm (150H, **backbone CH**<sub>3</sub>). Solvent peaks: 3.75 ppm and 1.83 ppm (m, THF) solvent peak and 7.26 ppm (s, CDCl<sub>3</sub>). <sup>19</sup>F NMR (300 MHz, CDCl<sub>3</sub>)  $\delta_{ppm}$ : Peaks have

disappeared.  $^{13}\text{C}$  NMR (400 MHz,  $\text{CDCl}_3$ )  $\delta_{\text{ppm}}$ : 63.0 ppm ( $\text{CH}_2\text{-O}$ ), 57.1 ppm ( $\text{CH}_2\text{-N}$ ), 45.8 ppm ( $\text{N-(CH}_3)_2$ ) and 44.8 ppm (**backbone quaternary C**). Solvent peaks: 77.04 ppm (t,  $\text{CDCl}_3$ ). IR  $\nu$  /  $\text{cm}^{-1}$ : 3043 - 2693  $\text{cm}^{-1}$  (w, multiple C-H stretch); 2819  $\text{cm}^{-1}$  (w, asym. C-H stretch ( $\text{N-CH}_3$ )); 2776  $\text{cm}^{-1}$  (w, sym. C-H stretch ( $\text{N-CH}_3$ )); 1719  $\text{cm}^{-1}$  (s,  $\text{C=O}$  stretch); 1676-1620  $\text{cm}^{-1}$  (w, aromatic C-H stretch overtone), 1452  $\text{cm}^{-1}$  (m, C-H bend ( $\text{CH}_2$ )), 1173  $\text{cm}^{-1}$  (s, C-O stretch); 1143  $\text{cm}^{-1}$  (s, C-N stretch).

*DBCO-pDMAEMA<sub>100</sub>*:  $^1\text{H}$  NMR (300 MHz,  $\text{CDCl}_3$ )  $\delta_{\text{ppm}}$ : 7.72-7.29 ppm (8H, br. m, **aromatic DBCO CH**) 5.20-5.13 ppm (DBCO  $\text{CH}_2\text{-N}$ ), 4.06 ppm (200H, s,  $\text{CH}_2\text{-O}$ ); 2.56 ppm (200H, br. s,  $\text{CH}_2\text{-N}$ ); 2.28 ppm (600H, s,  $\text{N-(CH}_3)_2$ ); 2.11-1.75 ppm (200H, multiple br. s, **backbone  $\text{CH}_2$** ); 1.17-0.771 ppm (300H, **backbone  $\text{CH}_3$** ). Solvent peaks: 3.75 ppm and 1.83 ppm (m, THF) solvent peak and 7.26 ppm (s,  $\text{CDCl}_3$ ).  $^{19}\text{F}$  NMR (300 MHz,  $\text{CDCl}_3$ )  $\delta_{\text{ppm}}$ : Peaks have disappeared.  $^{13}\text{C}$  NMR (400 MHz,  $\text{CDCl}_3$ )  $\delta_{\text{ppm}}$ : 63.0 ppm ( $\text{CH}_2\text{-O}$ ), 57.3 ppm ( $\text{CH}_2\text{-N}$ ), 45.9 ppm ( $\text{N-(CH}_3)_2$ ) and 44.9 ppm (**backbone quaternary C**). Solvent peaks: 77.04 ppm (t,  $\text{CDCl}_3$ ). IR  $\nu$  /  $\text{cm}^{-1}$ : 3033 - 2693  $\text{cm}^{-1}$  (w, multiple C-H stretch); 2819  $\text{cm}^{-1}$  (w, asym. C-H stretch ( $\text{N-CH}_3$ )); 2776  $\text{cm}^{-1}$  (w, sym. C-H stretch ( $\text{N-CH}_3$ )); 1720  $\text{cm}^{-1}$  (s,  $\text{C=O}$  stretch); 1672-1618  $\text{cm}^{-1}$  (w, aromatic C-H stretch overtone), 1455  $\text{cm}^{-1}$  (m, C-H bend ( $\text{CH}_2$ )), 1171  $\text{cm}^{-1}$  (s, C-O stretch); 1143  $\text{cm}^{-1}$  (s, C-N stretch).

*DBCO-pDMAEMA<sub>150</sub>*:  $^1\text{H}$  NMR (300 MHz,  $\text{CDCl}_3$ )  $\delta_{\text{ppm}}$ : 7.74-7.29 ppm (8H, br. m, **aromatic DBCO CH**) 5.21-5.12 ppm (DBCO  $\text{CH}_2\text{-N}$ ), 4.06 ppm (300H, s,  $\text{CH}_2\text{-O}$ ); 2.56 ppm (300H, br. s,  $\text{CH}_2\text{-N}$ ); 2.28 ppm (900H, s,  $\text{N-(CH}_3)_2$ ); 2.08-1.74 ppm (300H, multiple br. s, **backbone  $\text{CH}_2$** ); 1.12-0.779 ppm (450H, **backbone  $\text{CH}_3$** ). Solvent peaks: 3.75 ppm and 1.83 ppm (m, THF) solvent peak and 7.26 ppm (s,  $\text{CDCl}_3$ ).  $^{19}\text{F}$  NMR (300 MHz,  $\text{CDCl}_3$ )  $\delta_{\text{ppm}}$ : Peaks have disappeared.  $^{13}\text{C}$  NMR (400 MHz,  $\text{CDCl}_3$ )  $\delta_{\text{ppm}}$ : 63.0 ppm ( $\text{CH}_2\text{-O}$ ), 57.3 ppm ( $\text{CH}_2\text{-N}$ ), 45.9 ppm ( $\text{N-(CH}_3)_2$ ) and 44.9 ppm (**backbone quaternary C**). Solvent peaks: 77.04 ppm (t,  $\text{CDCl}_3$ ). IR  $\nu$  /  $\text{cm}^{-1}$ : 3040 - 2693  $\text{cm}^{-1}$  (w, C-H stretch); 2821  $\text{cm}^{-1}$  (w, asym. C-H stretch ( $\text{N-CH}_3$ ))); 2776  $\text{cm}^{-1}$  (w, sym. C-H stretch ( $\text{N-CH}_3$ )); 1720  $\text{cm}^{-1}$  (s,  $\text{C=O}$  stretch); 1672-1618  $\text{cm}^{-1}$  (w, aromatic C-H stretch overtone), 1455  $\text{cm}^{-1}$  (m, C-H bend ( $\text{CH}_2$ )), 1171  $\text{cm}^{-1}$  (s, C-O stretch); 1143  $\text{cm}^{-1}$  (s, C-N stretch).

CH<sub>3</sub>)); 2770 cm<sup>-1</sup> (w, sym. C-H stretch (N-CH<sub>3</sub>)); 1722 cm<sup>-1</sup> (s, C=O stretch); 1676-1626 cm<sup>-1</sup> (w, aromatic C-H stretch overtone), 1454 cm<sup>-1</sup> (m, C-H bend (CH<sub>2</sub>)), 1172 cm<sup>-1</sup> (s, C-O stretch); 1144 cm<sup>-1</sup> (s, C-N stretch).

**Fluorophore labelled DBCO-pDMAEMA<sub>n</sub>**

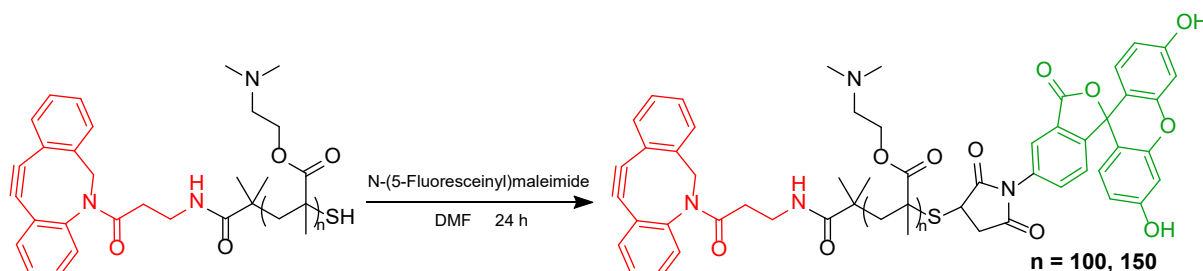

**Figure S3.** Labelling DBCO-pDMAEMA<sub>n</sub> with fluorescein (DBCO-pDMAEMA<sub>n</sub>-Fl).

DBCO-pDMAEMA<sub>n</sub> (0.10 g, 1 Eq), and *N*-(5-fluoresceinyl)maleimide (1.5 Eq) were dissolved in DMF (2 mL), degassed and left to stir for 24 h. The yellow mixture was reprecipitated into cold hexane from THF three times, yielding a yellow fluorescent polymer product. DMF SEC analysis was completed with the UV-Vis detector set at 494 nm to demonstrate size separation and absorbance overlap, Table S3 and Fig. S12. Polymer: dye ratios were calculated using UV-Vis.

**Table S3.** SEC results of DBCO-pDMAEMA<sub>n</sub>-Fl

| Polymer                         | $M_{n,th}^a$<br>(g.mol <sup>-1</sup> ) | $M_{n,exp}^b$<br>(g.mol <sup>-1</sup> ) | $M_{w,exp}^b$<br>(g.mol <sup>-1</sup> ) | $\bar{D}^b$ | Polymer:Dye <sup>c</sup> |
|---------------------------------|----------------------------------------|-----------------------------------------|-----------------------------------------|-------------|--------------------------|
| DBCO-pDMAEMA <sub>100</sub> -Fl | 15740                                  | 21800                                   | 29700                                   | 1.36        | 0.96                     |
| DBCO-pDMAEMA <sub>150</sub> -Fl | 22736                                  | 23600                                   | 32600                                   | 1.38        | 1.03                     |

<sup>a</sup> Determined assuming 100% successful DBCO functionalisation.

<sup>b</sup> Determined by SEC in DMF against PMMA standards.

<sup>c</sup> Calculated using UV-Vis spectroscopy and  $M_{n,exp}$  (Fluorescein  $\epsilon = 73,000$  cm<sup>-1</sup>M<sup>-1</sup>).

## 1.5 General Protocol for Metabolic Labelling of Cell Lines

A549 were seeded in Falcon 100 x 20 mm TC-treated cell culture dishes at a density of 25k cell.mL<sup>-1</sup> (250k cells per well) in Ham's F-12K (Kaighn's) Medium (F-12K) supplemented with 10% FBS, 1% PSA (complete media) and Ac<sub>4</sub>ManNAz (40 μM) in a humidified atmosphere of 95% air and 5% CO<sub>2</sub> at 37 °C for 72 h. SW480 were seeded in Falcon 100 x 20 mm TC-treated cell culture dishes at a density of 50k cell.mL<sup>-1</sup> (500k cells per well) in Advanced Dulbecco's Modified Eagle's Medium supplemented with 10% FBS, 1% PSA and Ac<sub>4</sub>ManNAz (40 μM) for 72 h in a humidified atmosphere of 95% air and 5% CO<sub>2</sub> at 37 °C. MCF-7 were seeded in Falcon 100 x 20 mm TC-treated cell culture dishes at a density of 100k cell.mL<sup>-1</sup> (1 million cells per well) in Dulbecco's Modified Eagle's Medium - high glucose supplemented with 10% FBS, 1% PSA and Ac<sub>4</sub>ManNAz (40 μM) in a humidified atmosphere of 95% air and 5% CO<sub>2</sub> at 37 °C for 72 h.

## 1.6 DBCO-pDMAEMA<sub>n</sub> and Doxorubicin Cytotoxicity

**Resazurin Assay.** Ac<sub>4</sub>ManNAz treated and untreated A549 and SW480 cells (40 μM, 72 h) were seeded in a 96 well plate at a density of 25k cell.mL<sup>-1</sup> (5k cells per well) and MCF-7 cells at a density 75k cell.mL<sup>-1</sup> (15k cells per well), in the presence and absence of Ac<sub>4</sub>ManNAz (40 μM), and were allowed to attach for 24 h. Following DPBS washes (x3), all cells were incubated with complete media supplemented with varying concentrations of DBCO-pDMAEMA<sub>n</sub> (0 – 250 μg.mL<sup>-1</sup>) or doxorubicin (0 – 250 μg.mL<sup>-1</sup>) for 2.5 h. Following three washes with DPBS, cell viability was determined by adding alamarBlue® reagent (10% v/v in cell media) to cells 24 h post-treatment. Cells were also incubated with doxorubicin (0 – 250 μg.mL<sup>-1</sup>) for 24 h and 48h (at half-cell density), immediately washed with DPBS and alamarBlue® reagent was added. Absorbance measurements were obtained at 570 nm and 600 nm using a BioTek Synergy HT microplate reader to monitor the reduction of resazurin to

resorufin by viable cells. Each sample was incubated for 4 h (or until resazurin reduction reached max 70%) with alamarBlue® solution at 37 °C and 5% CO<sub>2</sub> with readings obtained every 30 min / 1 h. Negative control cells untreated and treated with Ac<sub>4</sub>ManNAz (40 µM) were treated with alamarBlue® solution to provide a maximum resazurin reduction value of viable cells. A solution containing media alone and alamarBlue® solution was also measured for subtraction of percentage resazurin reduction values contributed from phenol red in media. Percentage cell viability was reported relative to either cells grown solely in cell culture media alone or Ac<sub>4</sub>ManNAz. Five biological repeats were completed.

Calculating Percentage Resazurin Reduction:

$$\frac{(\epsilon_{OX})\lambda_2 A\lambda_1 - (\epsilon_{OX})\lambda_1 A\lambda_2}{(\epsilon_{RED})\lambda_1 A'\lambda_2 - (\epsilon_{RED})\lambda_2 A'\lambda_1} \times 100$$

$$\lambda_1 = 570 \text{ nm}, \lambda_2 = 600 \text{ nm}$$

$A\lambda_1$  and  $A\lambda_2$  = Absorbance of test sample, control or media alone at 570 nm and 600 nm

$A'\lambda_1$  and  $A'\lambda_2$  = Absorbance of media alone at 570 nm and 600 nm

$(\epsilon_{OX})$  and  $(\epsilon_{RED})$  = Molar extinction coefficient of resazurin at respective wavelengths

Calculating Percentage Viability Relative to Control Cells:

$$\frac{\% \text{ Resazurin Reduction of Test Sample} - \% \text{ Resazurin Reduction of Media Alone}}{\% \text{ Resazurin Reduction of Cell Control} - \% \text{ Resazurin Reduction of Media alone}} \times 100$$

**LDH Assay.** Ac<sub>4</sub>ManNAz treated and untreated A549 and SW480 cells (40 µM, 72 h) were seeded in a 96 well plate at a density of 50k cell.mL<sup>-1</sup> (10k cells per well) and MCF-7 cells at a density 75k cell.mL<sup>-1</sup> (15k cells per well), in the presence and absence of Ac<sub>4</sub>ManNAz (40 µM), and were allowed to attach for 24 h. Following this, cells were washed with DPBS (x3) and incubated with complete media supplemented with varying concentrations of DBCO-pDMAEMA<sub>n</sub> (0 – 250 µg.mL<sup>-1</sup>, 100 µL) for 2.5 h. Lysis controls were also prepared for Ac<sub>4</sub>ManNAz treated and untreated cells by adding lysis solution provided by the Thermo



Scientific™ Pierce™ LDH Cytotoxicity Assay Kit to cells. Briefly, Ac<sub>4</sub>ManNAz treated and untreated cells were washed with DPBS (x3) and incubated with 100 µL of complete media containing lysis solution (10 µL prepared in ultrapure H<sub>2</sub>O) for 45 min. Ultrapure water (10 µL) was also added to polymer treated and untreated cells, following the 2.5 h incubation, to maintain the same conditions as lysis controls. The supernatants of polymer treated cells, the lysis controls and polymer untreated cell controls were transferred to a separate 96 well plate (50 µL) and the LDH assay was completed immediately afterwards. LDH reaction mixture (50 µL) was added to the sample and control supernatants (50 µL), incubated at RT for 30 min and stop solution was subsequently added (50 µL), provided by the Thermo Scientific™ Pierce™ LDH Cytotoxicity Assay Kit. Absorbance readings were recorded at 490 nm and 680 nm using a BioTek Synergy HT microplate reader to monitor active LDH release from plasma membrane damage and as a background subtraction measurement, respectively. Three biological repeats were completed.

LDH Activity and % LDH Release/Cytotoxicity Calculations:

$$LDH\ Activity = A_{490\ nm} - A_{680\ nm}$$

$$\% LDH\ Release/Cytotoxicity = \frac{Polymer\ Treated\ LDH\ Activity - Cell\ Alone\ LDH\ Activity}{Lysate\ Control\ LDH\ Activity - Cell\ Alone\ LDH\ Activity} \times 100$$

**Live/ Dead.** Ac<sub>4</sub>ManNAz treated and untreated A549 and SW480 cells (40 µM, 72 h) were seeded in a 96 well plate at a density of 50k cell.mL<sup>-1</sup> (10k cells per well) and MCF-7 cells at a density 75k cell.mL<sup>-1</sup> (15k cells per well), in the presence and absence of Ac<sub>4</sub>ManNAz (40 µM), and were allowed to attach for 24 h. Following this, cells were washed with DPBS (x3) and incubated with complete media supplemented with varying concentrations of DBCO-pDMAEMA<sub>100/150</sub> (2 – 250 µg.ml<sup>-1</sup>, 100 µL) for 2.5 h. The polymer solutions were removed, cells washed with DPBS (x3) and incubated in complete media for 24 h in a humidified atmosphere of 95% air and 5% CO<sub>2</sub> at 37 °C for 96 h. Following removal of media and DPBS

washes (x3), cells were stained with ethidium iodide (2  $\mu$ M) and calcein (2  $\mu$ M) in DPBS (100  $\mu$ L) for 40 mins at RT. Ac<sub>4</sub>ManNAz untreated and treated cells were also stained as control viable cell samples. Cells were imaged on an Olympus CX41 microscope equipped with a UIS-2 20x/0.45/ $\infty$ /0–2/FN22 lens using a phase contrast channel and with blue (calcein) and green (ethidium) excitation lasers. Cells were counted using ImageJ. Values were reported as percentage live cells relative to the total number of cells (four biological repeats were completed).

### 1.7 DBCO-pDMAEMA<sub>n</sub> Haemolysis

Ovine blood (TCS Biosciences, UK) was centrifuged at 2000 rpm for 5 min and re-suspended in DPBS to generate a 30% haematocrit solution. The ovine blood solution (100  $\mu$ L) was transferred to a 96 well plate and incubated with DBCO-pDMAEMA<sub>100/150</sub> (100  $\mu$ L, 3h). Blood incubated with either lysis buffer (0.32 M sucrose, 5 mM magnesium chloride, 1% triton X-100, 10 mM Tris HCl pH 7.8) or DPBS, for 3 h, was completed to provide a positive and negative control, respectively. Wells filled with DPBS alone (200  $\mu$ L) was provided as a vehicle control for background subtraction. After three hours, the cells were centrifuged at 3700 rpm for 5 min and the alkaline haematin D-575 (AHD575) assay was conducted. Briefly, 8  $\mu$ L of the supernatant from each well was added to 100  $\mu$ L of AHD solution (2.5 w/v% triton-X100 and 0.1 M NaOH in water) and absorbance measurements were recorded at 580 nm. Values were reported as %haemolysis (four biological repeats were completed).

$$\%haemolysis = \frac{Sample\ Absorbance_{580} - Vehicle\ Control\ Absorbance_{580}}{Positive\ Control\ Absorbance_{580} - Vehicle\ Control\ Absorbance_{580}} \times 100$$

### 1.7 Additional Mechanistic Studies

**Annexin/ PI.** Ac<sub>4</sub>ManNAz treated and untreated A549 and SW480 cells (40  $\mu$ M, 72 h) were seeded in a 96 well plate at a density of 50k cell.mL<sup>-1</sup> (10k cells per well) and MCF-7 cells at

a density  $75\text{k cell.mL}^{-1}$  (15k cells per well), in the presence and absence of Ac4ManNAz (40  $\mu\text{M}$ ), and allowed to attach for 24 h. Following this, all cells were incubated with complete media supplemented with DBCO-pDMAEMA<sub>100/150</sub> ( $\text{EC}_{90}$  concentration determined by cell viability data, 2.5 h), washed with DPBS and treated with FITC Annexin V/Dead Cell Apoptosis Kit (Invitrogen). Briefly, DPBS was replaced with a solution consisting of Annexin-Binding buffer (75  $\mu\text{L}$ ), FITC Annexin (25  $\mu\text{L}$ ) and Propidium Iodide (PI) (2  $\mu\text{L}$  of  $100\text{ }\mu\text{g.mL}^{-1}$ ) and allowed to incubate at RT for 15 min. Cells were subsequently washed with Annexin-Binding Buffer (x3) and fresh buffer was added. Cells were imaged on an Olympus CX41 microscope equipped with a UIS-2 20x/0.45/ $\infty$ /0–2/FN22 lens using a phase contrast channel and with blue (FITC Annexin) and green (PI) excitation lasers.

***Caspase-3/7 Kinetics Apoptosis Assay.*** Ac4ManNAz treated and untreated A549 and SW480 cells (40  $\mu\text{M}$ , 72 h) were seeded in a 96 well plate at a density of  $50\text{k cell.mL}^{-1}$  (10k cells per well) in the presence and absence of Ac4ManNAz (40  $\mu\text{M}$ ) and allowed to attach for 24 h. Following this, all cells were washed with DPBS (x3) and incubated with complete media supplemented with CellEvent Caspase-3/7 Detection Reagent (5  $\mu\text{M}$ ) and DBCO-pDMAEMA<sub>100/150</sub> (0 –  $125\text{ }\mu\text{g.mL}^{-1}$ ). Images were taken at 0.5, 1, 2.5 and 4 h time intervals on an Olympus CX41 microscope using a phase contrast channel and a blue excitation laser. Ac4ManNAz untreated and treated cells were also stained as ‘negative’ control cells. Cells were counted using ImageJ and values were reported as percentage caspase positive cells relative to the total number of cells. Four biological repeats were completed.

***Polymer Degrafting Post-Treatment Fluorescence.*** Ac4ManNAz treated and untreated A549 and SW480 cells (40  $\mu\text{M}$ , 72 h) were seeded in a black opaque 96 well plate at a density of  $50\text{k cell.mL}^{-1}$  (10k cells per well) in the presence and absence of Ac4ManNAz (40  $\mu\text{M}$ ) and allowed to attach for 24 h. Following this, cells were washed with DPBS (x3) and incubated with complete media supplemented with varying concentrations of DBCO-pDMAEMA<sub>100/150</sub>-Fl (0

– 250  $\mu\text{g.mL}^{-1}$ , 100  $\mu\text{L}$ ) for 2.5 h. The polymer solutions were removed, cells washed with DPBS (x3) and replaced with complete media. Fluorescence measurements were recorded using a BioTek Synergy HT microplate reader using a 488 nm excitation laser and 528 filter immediately, 0.5 h, 1 h, 2 h and 4 h post-treatment. At each time point, supernatants were collected, replaced with fresh media and the fluorescence of both cells and supernatants were recorded. Four biological repeats were completed.

***Polymer Grafting and Membrane Damage Confocal Microscopy.*** Ac<sub>4</sub>ManNAz treated and untreated A549 and SW480 cells were seeded in the small compartment of CELLview™ Culture dishes (Greiner Bio-One) at a density of 25k cell.mL<sup>-1</sup> (5k cells) in the presence and absence of Ac<sub>4</sub>ManNAz (40  $\mu\text{M}$ ) and allowed to attach for 24 h. Cells were washed with DPBS (x3) and subsequently incubated with DBCO-pDMAEMA<sub>100/150</sub>-Fl for 2.5 h. Polymer solutions were removed and replaced with Leibovitz's L-15 Medium with no phenol red (Gibco), following x3 DPBS washes. Confocal imaging was completed immediately afterwards using a Plan-Apochromat 63x/1.40 Oil DIC M27 objective lens, 488 nm excitation laser (2.0% power), filters set to 493 – 634 nm, a master gain of 750, digital gain of 1.00 and no digital offset. MBS: MBS 488, MBS\_InVis: Plate and DBS1: Mirror beam splitters were selected and the pinhole size was kept at 1 AU (54  $\mu\text{m}$ ). Z-stacks were taken at 2.0 zoom every  $z = 0.41 \mu\text{m}$  until the whole cell was imaged. Images collected possessed dimensions of x: 792, y: 792, z: 10 – 12, channels: 2 (FITC and DIC), 16-bit. Averaging was kept to line 8 and pixel dwell 0.67  $\mu\text{s}$ . Proceeding imaging, cells treated with DBCO-p(DMAEMA)<sub>100/150</sub> for 2.5 h were washed with DPBS (x3) and stained with CellMask™ Deep Red Plasma membrane Stain (25  $\mu\text{g.mL}^{-1}$ , 100  $\mu\text{L}$ ) for 30 min at RT. Cells were washed, stained with NucBlue® Live Cell ReadyProbes® Reagent (5 min at RT) in L15 media with no phenol red and imaged. Control viable cells treated and untreated with Ac<sub>4</sub>ManNAz but not treated with polymer solutions were also stained with the membrane and nuclear stain for comparison. Confocal imaging was completed using a

Plan-Apochromat 63x/1.40 Oil DIC M27 objective lens; Ch1: 405 nm, ChS1: 488 nm, Ch2: 633 nm excitation lasers all set to 2.0% power; filters set to Ch1: 410 – 483 nm, ChS1: 490 – 632 nm and Ch2: 638 – 747 nm; master gain of Ch1: 650, ChS1: 700 and Ch2: 700 – 1000; digital gain of 1.0 and no digital offset. MBS: MBS 488/561/633, MBS\_InVis: MBS -405, DBS1: Mirror beam splitters were selected and the pinhole size was kept at 1 AU (42  $\mu$ m). Z-stacks were taken of 2.0 zoom every  $z = 0.41 \mu$ m until the whole cell was imaged. Images collected possessed dimensions of x: 956, y: 956, z: 10 – 12, channels: 4 (DAPI, FITC, Deep Red, DIC), 16-bit. Averaging was kept to line 8 and pixel dwell 0.55  $\mu$ s. Maximum intensity projection images and 3D reconstructions were produced using Zen 2.3 (blue edition).

## **1.8 General Protocol for Metabolic Glycan Labelling of Spheroids**

A549 spheroids were metabolically labelled using two approaches: (1) spheroid formation in Ac<sub>4</sub>ManNAz (4 days) and (2) pre-formed spheroids (for 3 days) were subsequently treated with Ac<sub>4</sub>ManNAz (4 days). For method (1), A549 cells were seeded in an ultralow attachment U-bottom plate at a seeding density of (2k cells per well) in the presence and absence of Ac<sub>4</sub>ManNAz (40  $\mu$ M). The plate was centrifuged at 2k RPM for 10 min and spheroids were allowed to grow for 96 h in a humidified atmosphere of 95% air and 5% CO<sub>2</sub> at 37 °C. For method (2), A549 cells were seeded in an ultralow attachment U-bottom plate at a seeding density of (1k cells per well) centrifuged at 2k RPM for 10 min and allowed to form for 72 h. Following removal of media, the preformed spheroids were treated with or without Ac<sub>4</sub>ManNAz (40  $\mu$ M) supplemented media for 96 h. Spheroids made using both approaches were subsequently treated with polymer solutions, or doxorubicin, and subjected to cell viability and cytotoxicity assays (see section 1.9).

To confirm Ac<sub>4</sub>ManNAz recruitment with both methods, spheroids were stained with DBCO-Cy3 (50  $\mu$ M, 2 h) and NucBlue® Live Cell ReadyProbes® Reagent (15 min). Confocal Z-stack

imaging was completed on a Zeiss LSM 880 microscope equipped with a EC Plan-Neofluar 10x/0.30 M27 objective lens, Ch1: 405 and Ch2: 514 nm excitation lasers (2.0% power), filters set to Ch1: 411 – 531 nm and Ch2: 538 – 680 nm, a master gain of Ch1: 750 and Ch2: 1000, digital gain of Ch1: 1.00 and Ch2: 2.00 and no digital offset. MBS: MBS 458/514, MBS\_InVis: MBS -405 and DBS1: Mirror beam splitters were selected and the pinhole size was kept at 1 AU (43  $\mu\text{m}$ ). Images collected possessed dimensions of x: 2048, y: 2048, z: 33, channels: 3 (DAPI, Cy3, DIC), 16-bit. Z-stacks were taken every 5  $\mu\text{m}$ , averaging was kept to line 8 and pixel dwell 0.52  $\mu\text{s}$ . Spheroids untreated with Ac<sub>4</sub>ManNAz were also incubated with DBCO-Cy3, stained with NucBlue® Live Cell ReadyProbes® Reagent and imaged using the above conditions as a negative control. Maximum intensity projection images and 3D reconstructions were produced using Zen 2.3 (blue edition).

## **1.9 DBCO-pDMAEMA<sub>n</sub> Spheroid Cytotoxicity and Viability Assays**

**Spheroid Cytotoxicity Assay.** A549 spheroids formed in the presence and absence of Ac<sub>4</sub>ManNAz (Method (1) from section 1.8) were treated with DBCO-pDMAEMA<sub>100/150</sub> at an appropriate set of concentrations (25, 62.5 and 250  $\mu\text{g}\cdot\text{mL}^{-1}$ ) for 3 h. Polymer solutions were subsequently removed, spheroids were washed with DPBS (2x) and cell media was added (100  $\mu\text{L}$ ). CellTox™ Green reagent (100  $\mu\text{L}$ , 2X concentration) was subsequently added and cells were allowed to incubate at RT for 15 min. Spheroids were centrifuged at 2k RPM for 5 min to ensure homogeneity of assay solutions and to collect spheroids at the bottom of U bottom 96 well plates. Z-stack confocal imaging was completed using an EC Plan-Neofluar 10x/0.30 M27 objective lens, a 488 nm excitation laser (2.0% power), filter set to 493 – 634 nm, master gain of 550, digital gain of 1.00 and no digital offset. MBS: MBS 488, MBS\_InVis: Plate, DBS1: Mirror beam splitters were selected and the pinhole size was kept at 1 AU. Images collected possessed dimensions of x: 2048, y: 2048, z: 30, channels: 2 (FITC and DIC), 16-bit.

Z-stacks were taken every 5  $\mu\text{m}$ , averaging was kept to line 8 and pixel dwell 0.52  $\mu\text{s}$ . Ac<sub>4</sub>ManNAz treated and untreated spheroids that were untreated with polymer solutions were analysed as above as negative controls. A lysis control was also prepared by adding lysis solution provided by the CellTox™ Green Cytotoxicity Assay (4  $\mu\text{L}$  per 100  $\mu\text{L}$ ) for 30 min, as a positive control. Maximum intensity projection images and 3D reconstructions were produced using Zen 2.3 (blue edition).

***Spheroid Viability Assay.*** A549 spheroids produced using both protocols from section 1.8 were incubated with DBCO-pDMAEMA<sub>n</sub> (31.3 – 500  $\mu\text{g.mL}^{-1}$ , 100  $\mu\text{L}$ ) for 3 h in a humidified atmosphere of 95% air and 5% CO<sub>2</sub> at 37 °C. The polymer solutions were removed and spheroids were washed with DPBS (x3). Following replacement of media with fresh media (100  $\mu\text{L}$ ), an equal volume of CellTiter-Glo® was subsequently added and the plate was placed on a plate shaker for 10 min to ensure lysis. The plate was allowed to equilibrate for 25 min at RT and the solutions were transferred into an opaque white plate suitable for luminescence measurements collected using a BioTek Synergy HT microplate reader. A solution containing fresh media (100  $\mu\text{L}$ ) and CellTiter-Glo® was measured for background subtraction and percentage cell viability was calculated relative to polymer untreated Ac<sub>4</sub>ManNAz treated and untreated A549 spheroids. Five/six biological repeats were completed.

$$\%Spheroid\ Viability = \frac{Polmer\ treated\ Luminescence - Background\ Luminescence}{Viable\ Spheroid\ Luminescence - Background\ Luminescence} \times 100$$

### **1.10 Doxorubicin Spheroid Viability Assay**

A549 spheroids produced using both protocols from section 1.8 were incubated with doxorubicin (31.3 – 500  $\mu\text{g.mL}^{-1}$ , 100  $\mu\text{L}$ ) for 24 h. The solutions were removed and spheroids were washed with DPBS (x3). Following replacement of media with fresh media (100  $\mu\text{L}$ ), an equal volume of CellTiter-Glo® was subsequently added and the protocol was completed as described above (section 1.9).

## 2 Additional Results

### 2.1 Polymer Characterisation

#### 2.1.1 PFP-*p*DMAEMA<sub>n</sub> and DBCO-*p*DMAEMA<sub>n</sub>

PFP-*p*DMAEMA<sub>n</sub> and DBCO-*p*DMAEMA<sub>n</sub> polymers were fully characterised using <sup>1</sup>H and <sup>19</sup>F NMR spectroscopy (Fig. S4 – S6 and Fig. S7 – S9), IR spectroscopy (Fig. S13) and SEC (Fig. S14). SEC confirmed the synthesis of polymers of three different chain lengths, with sizes corroborating well with the theoretical M<sub>n</sub> values (Figure 1, see manuscript). Any discrepancies between the experimental and theoretical M<sub>n</sub> was attributed to the difference in molecular structure of the polymer products and the linear PMMA standards used in the GPC studies. Thiocarbonate conversion to thiol was evident by removal of <sup>1</sup>H NMR peaks associated to the connected (CH<sub>2</sub>)<sub>11</sub>CH<sub>3</sub> chain (~1.30 ppm (16H, t, H<sup>2-9</sup>). Removal of a S-(C=S)-S stretch (1030 cm<sup>-1</sup>, s) in IR spectra of DBCO-*p*(HEA)<sub>n</sub> provided further confirmation. Removal of PFP was established via the absence of peaks in <sup>19</sup>F NMR and C-F stretch (1520 cm<sup>-1</sup> and 915 cm<sup>-1</sup>) in IR spectra. Addition of a DBCO moiety was confirmed by the presence of aromatic DBCO CH peaks (7.80 ppm – 7.00 ppm) and peaks corresponding to DBCO CH<sub>2</sub>-N (5.21-5.12 ppm) in <sup>1</sup>H NMR and DBCO aromatic overtone peaks (1676-1626 cm<sup>-1</sup>) in IR spectra. The hydrophobic nature of DBCO resulted in increases to MW values obtained by SEC and dispersity readings due to non-specific hydrophobic secondary interaction with the SEC stationary phase, providing further confirmation of functionalisation. Finally, all integration values were in good agreement with expectations with minimal discrepancies due to polymer dispersity and residual solvent.



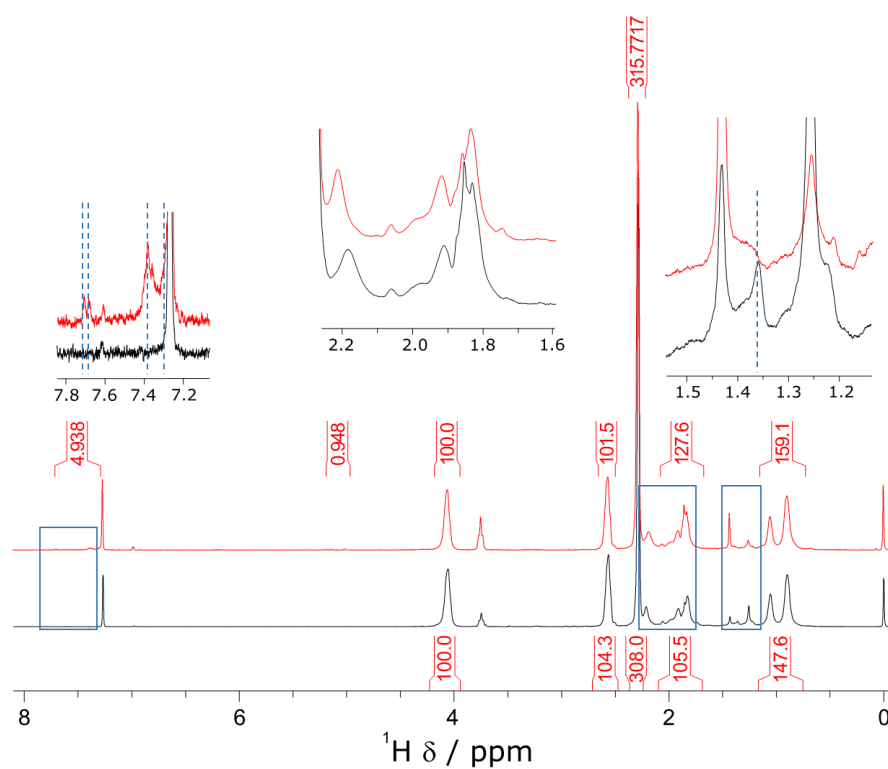

**Figure S4.**  $^1\text{H}$  NMR of  $\text{pDMAEMA}_{50}$  before (black) and after (red) functionalisation with DBCO. Peak alterations following functionalisation have been highlighted in blue.

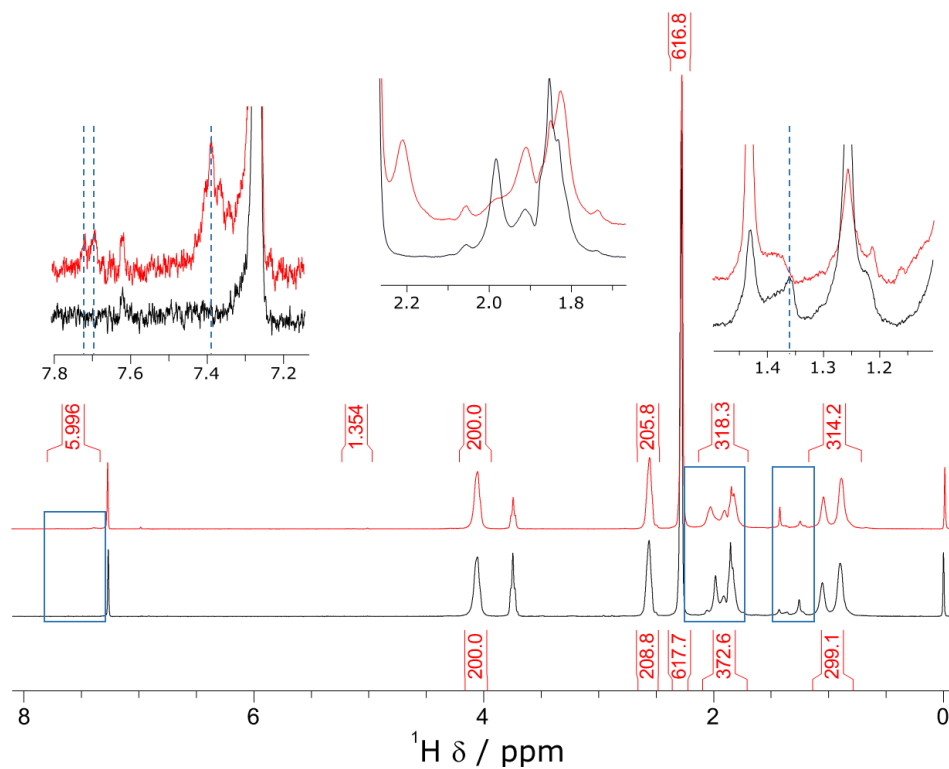

**Figure S5.**  $^1\text{H}$  NMR of  $\text{pDMAEMA}_{100}$  before (black) and after (red) functionalisation with DBCO. Peak alterations following functionalisation have been highlighted in blue.

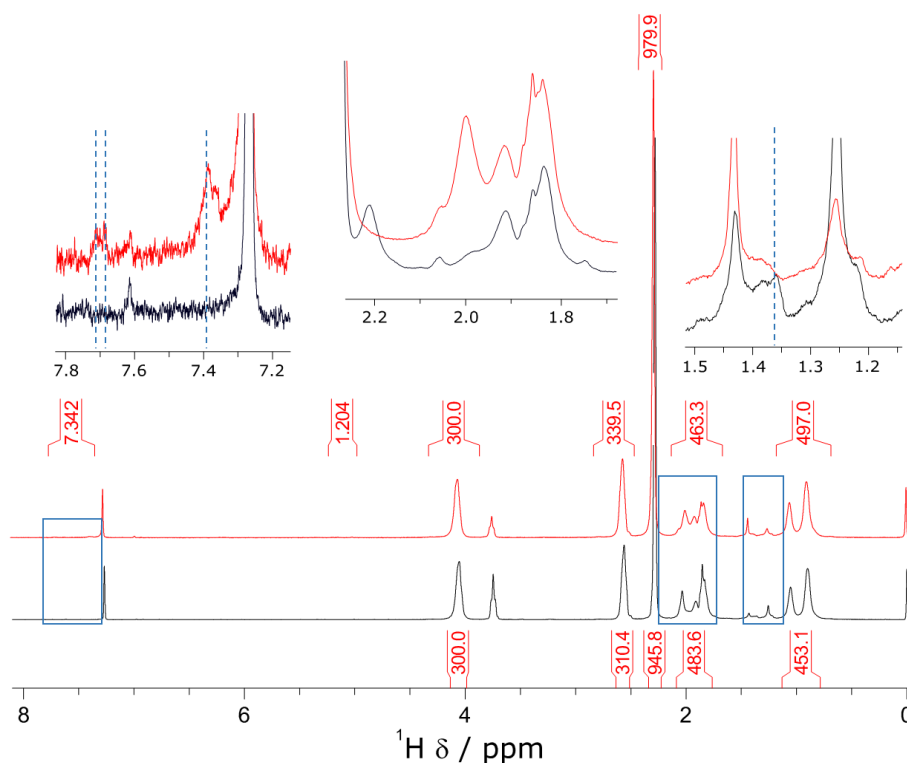

**Figure S6.**  $^1\text{H}$  NMR of  $\text{pDMAEMA}_{150}$  before (black) and after (red) functionalisation with DBCO. Peak alterations following functionalisation have been highlighted in blue.

#### DBCO-50

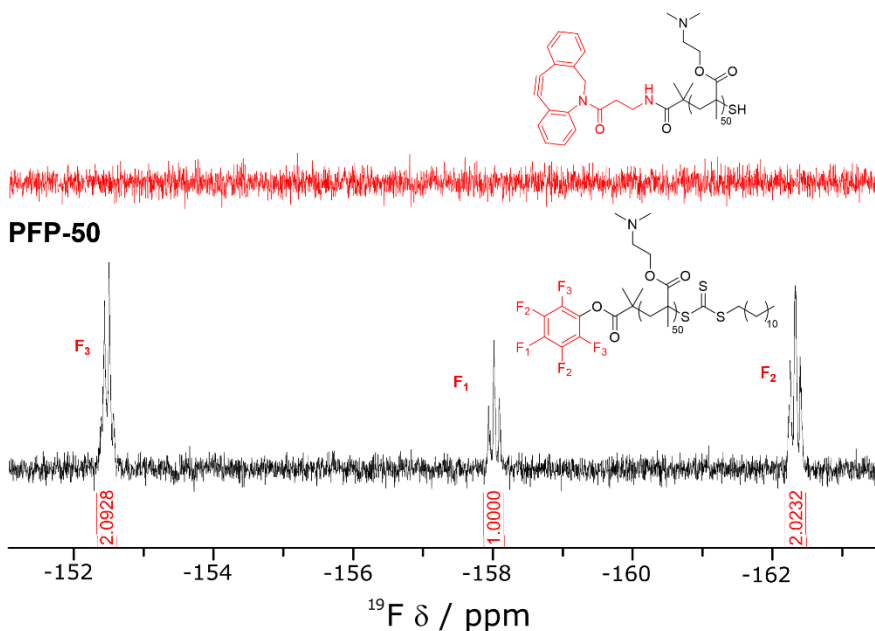

**Figure S7.**  $^{19}\text{F}$  NMR of  $\text{pDMAEMA}_{50}$  before (black) and after (red) functionalisation with DBCO. The peak representing the para fluorine of the PFP ester group ( $\text{F}_1$ ), at  $\sim 158$  ppm, has been calibrated to 1 to demonstrate correct integration values of all peaks. The disappearance of fluorine peaks confirms cleavage of the PFP ester and substitution with DBCO.

**DBCO-100**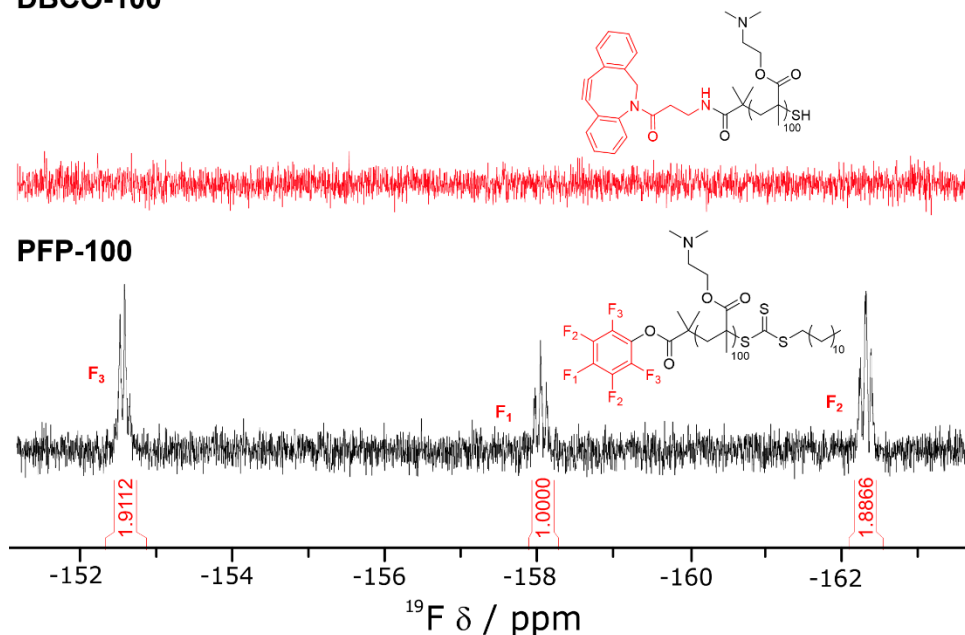

**Figure S8.**  $^{19}\text{F}$  NMR of pDMAEMA<sub>100</sub> before (black) and after (red) functionalisation with DBCO. The peak representing the para fluorine of the PFP ester group (F<sub>1</sub>), at ~158 ppm, has been calibrated to 1 to demonstrate correct integration values of all peaks. The disappearance of fluorine peaks confirms cleavage of the PFP ester and substitution with DBCO.

**DBCO-150**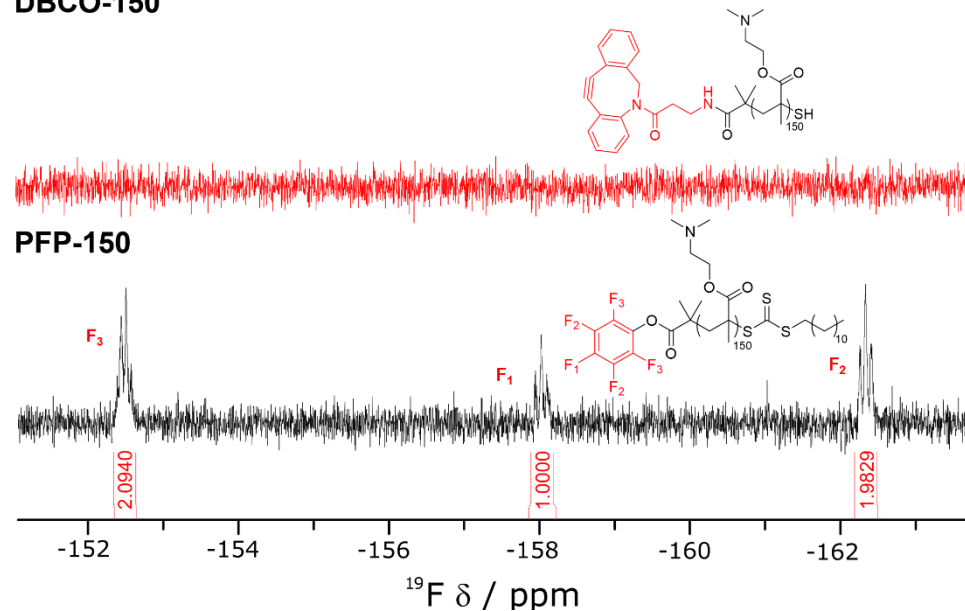

**Figure S9.**  $^{19}\text{F}$  NMR of pDMAEMA<sub>150</sub> before (black) and after (red) functionalisation with DBCO. The peak representing the para fluorine of the PFP ester group (F<sub>1</sub>), at ~158 ppm, has been calibrated to 1 to demonstrate correct integration values of all peaks. The disappearance of fluorine peaks confirms cleavage of the PFP ester and substitution with DBCO.

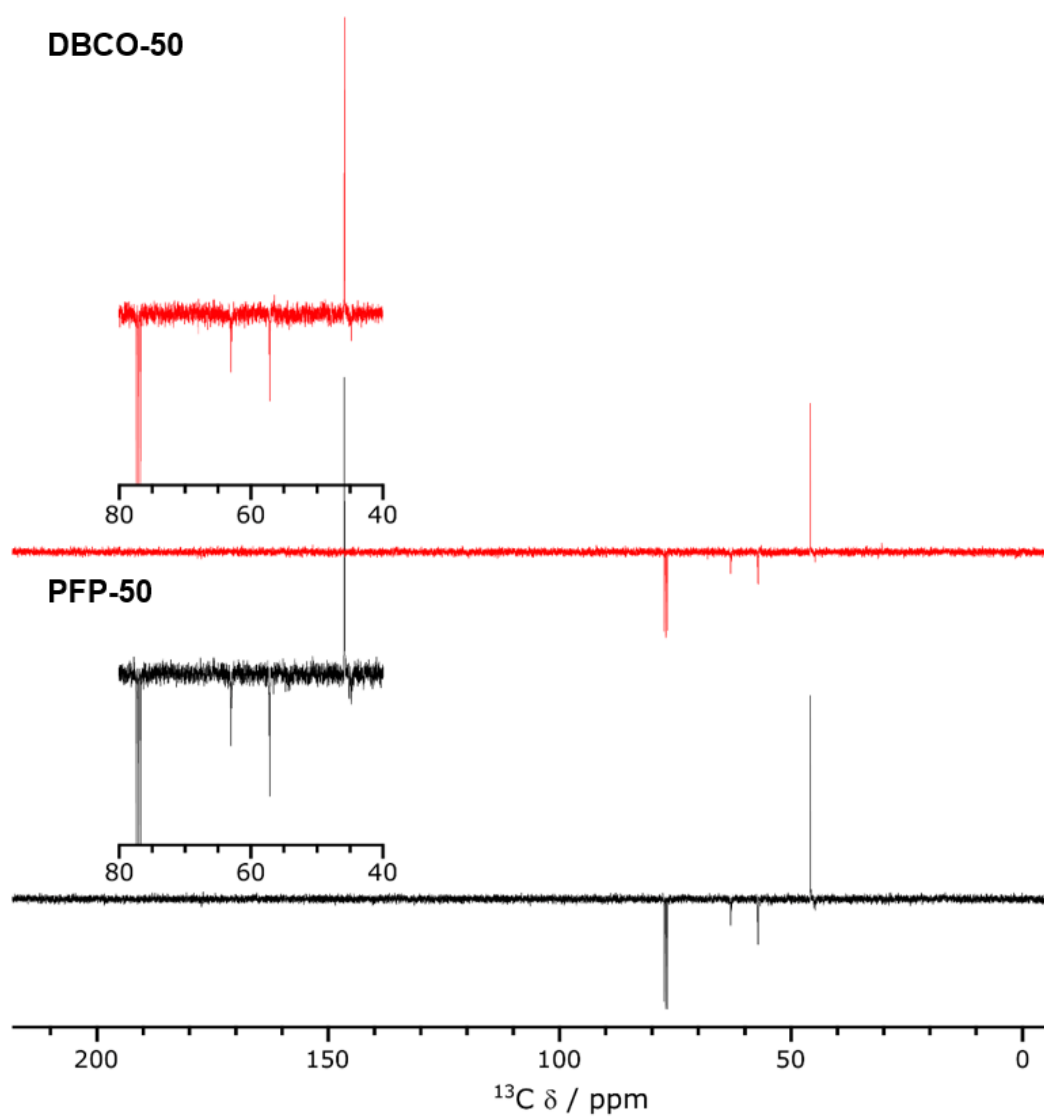

**Figure S10.**  $^{13}\text{C}$  NMR of  $p\text{DMAEMA}_{50}$  before (black) and after (red) functionalisation with DBCO.

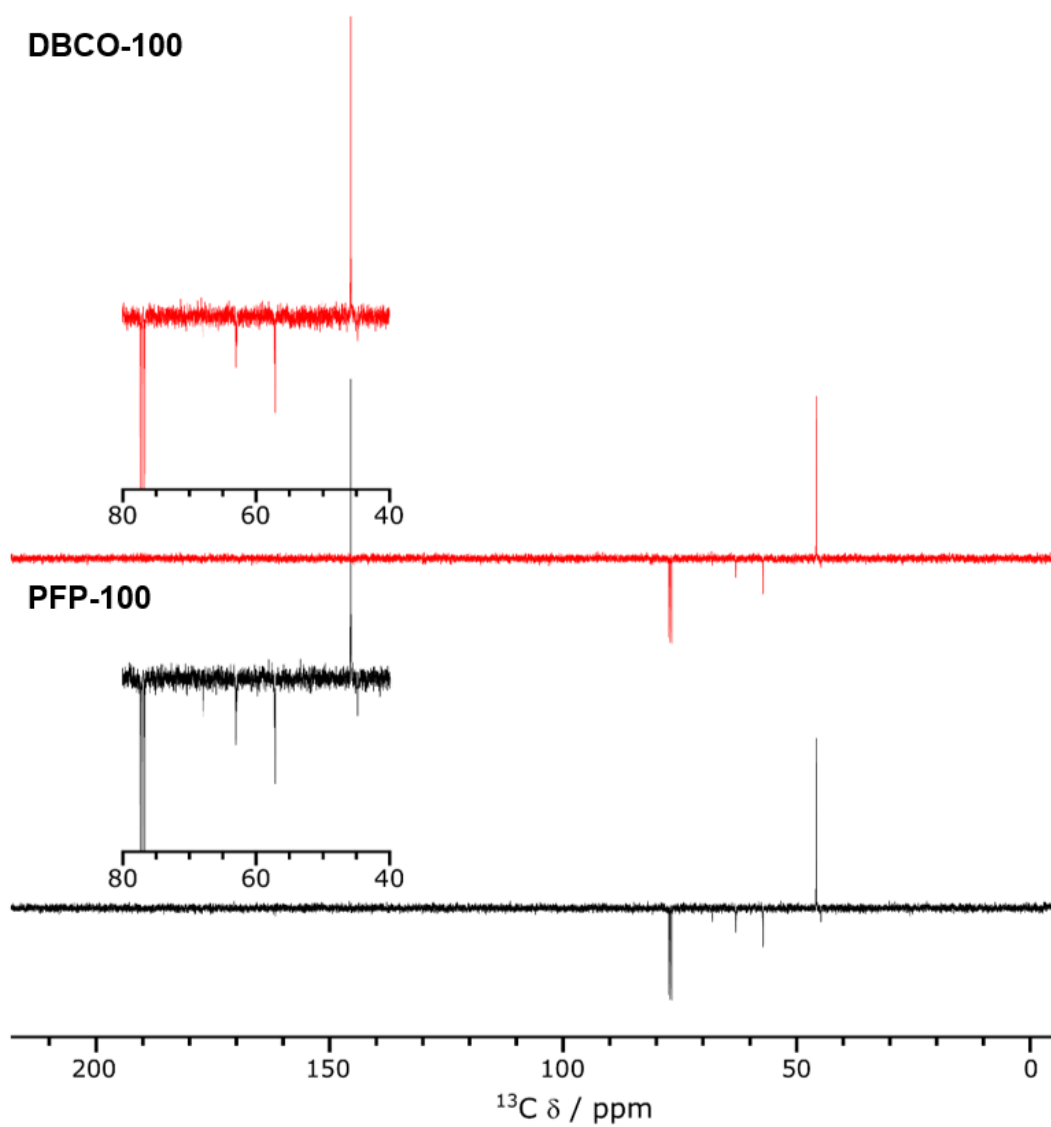

**Figure S11.**  $^{13}\text{C}$  NMR of  $\text{pDMAEMA}_{100}$  before (black) and after (red) functionalisation with DBCO.

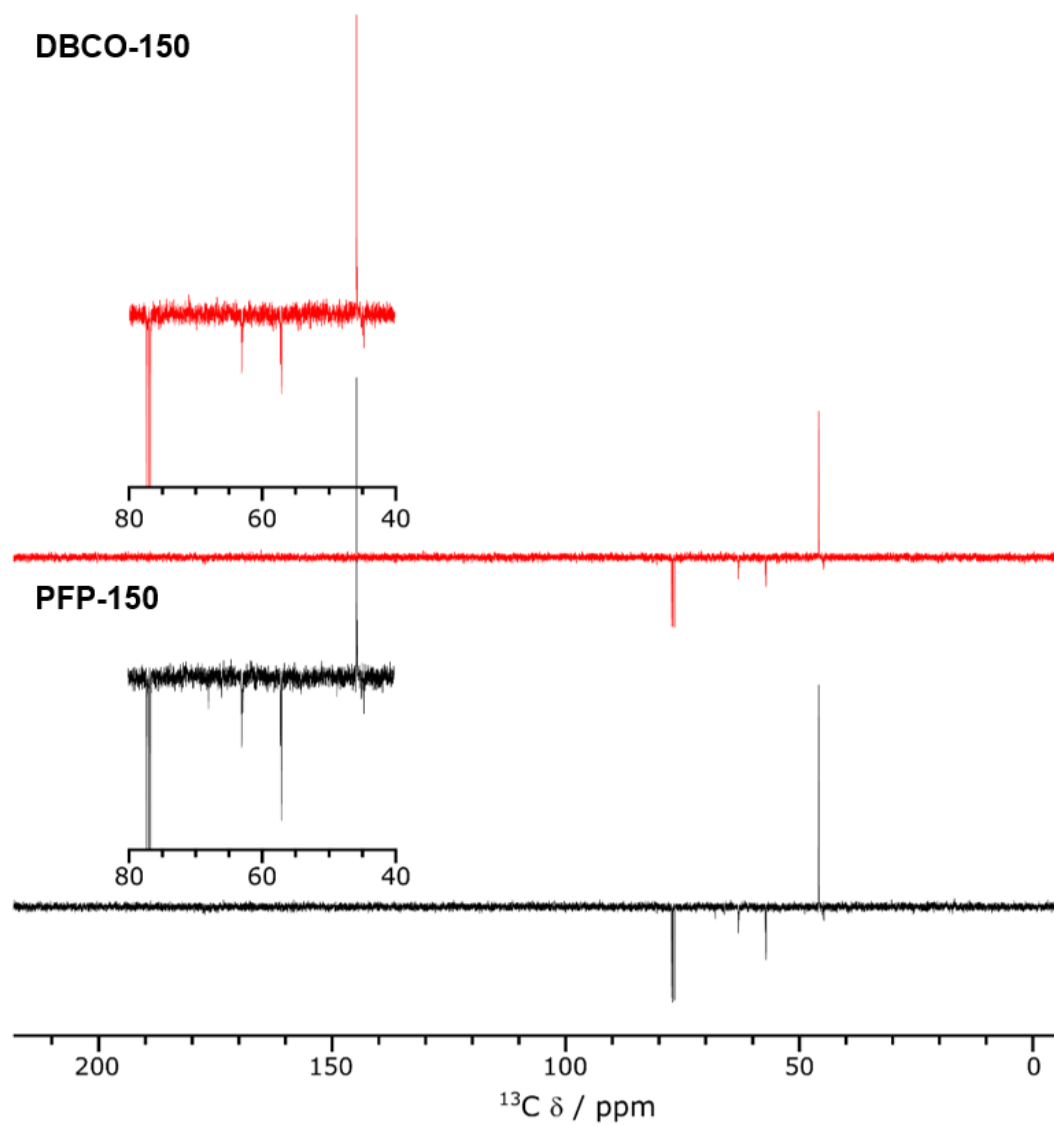

**Figure S12.**  $^{13}\text{C}$  NMR of  $p\text{DMAEMA}_{150}$  before (black) and after (red) functionalisation with DBCO.

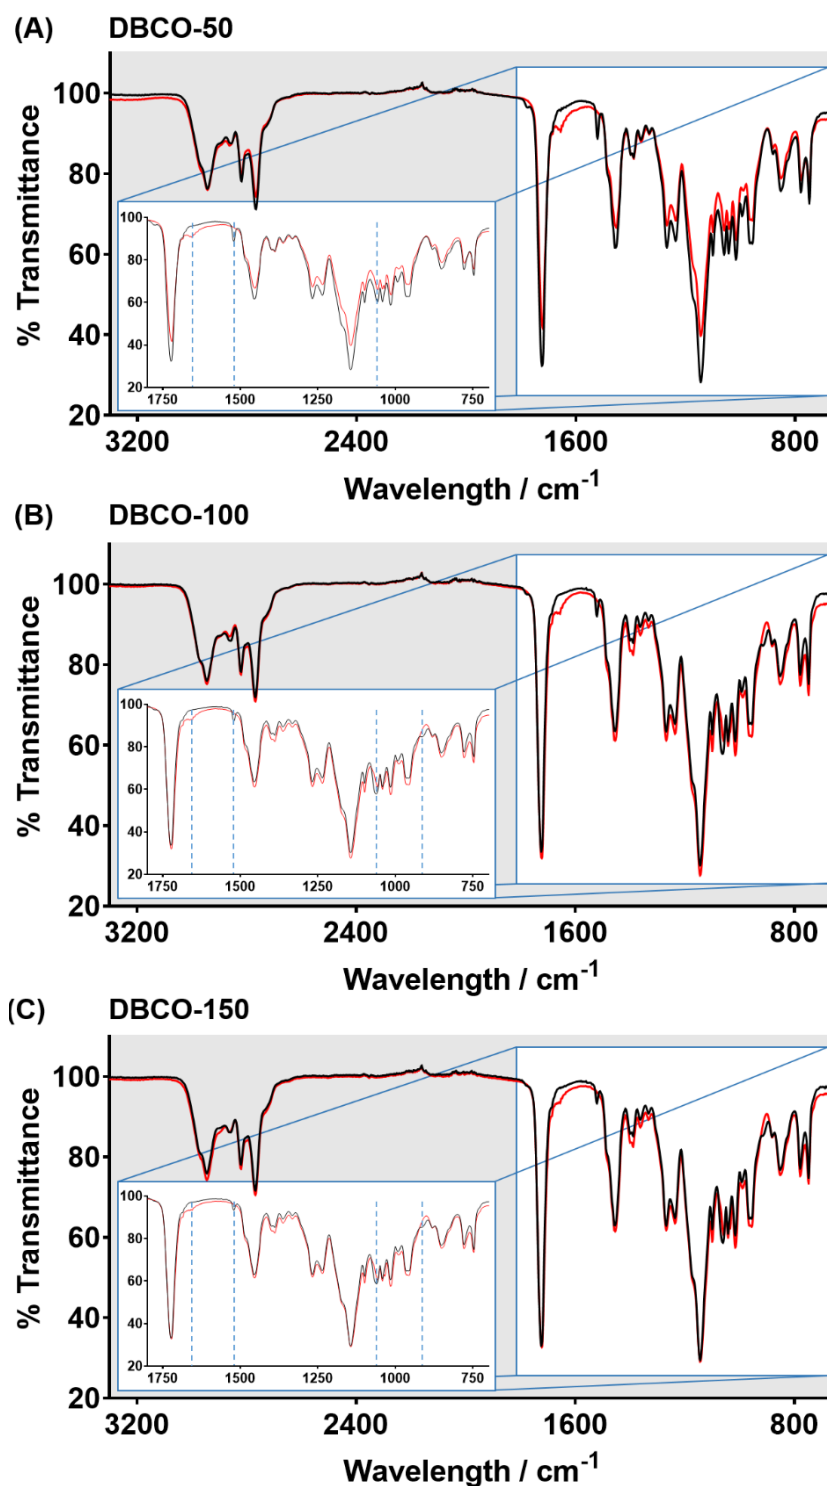

**Figure S13.** IR spectrum of  $\text{pDMAEMA}_n$  before (black) and after (red) functionalisation with DBCO. Peak alterations following functionalisation have been highlighted in blue. Confirmation of PFP cleavage and DBCO substitution was evident by the loss of peaks associated with C-F stretch (1522  $\text{cm}^{-1}$  and 915  $\text{cm}^{-1}$ ) and the trithiocarbonate end group (1063  $\text{cm}^{-1}$ ). Addition of DBCO aromatic was also noted by the overtone peaks at 1676-1626  $\text{cm}^{-1}$ .

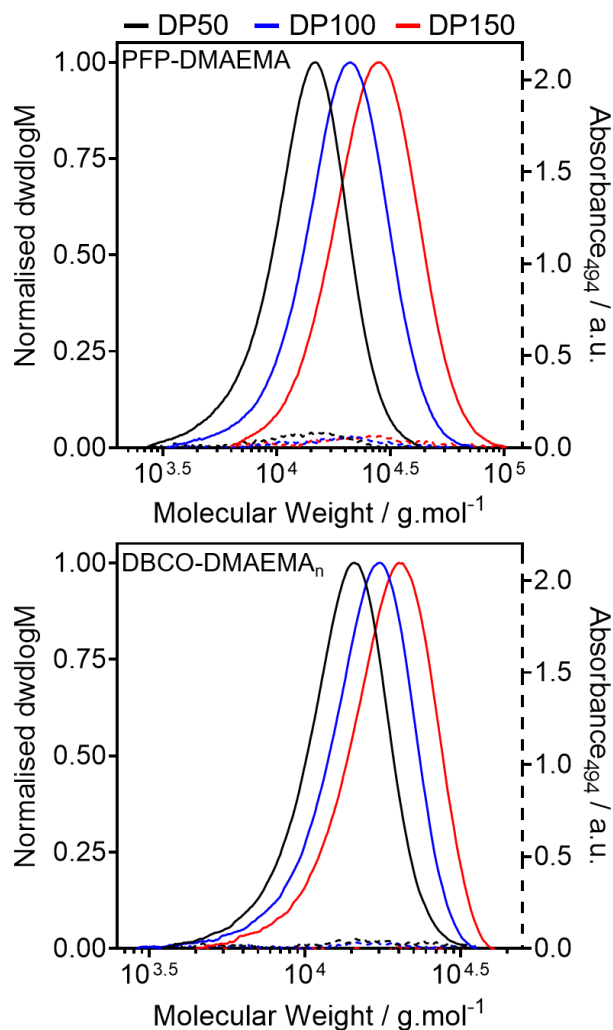

**Figure S14.** SEC measurements of PFP-DMAEMA<sub>n</sub> and DBCO-DMAEMA<sub>n</sub> polymers were recorded using an RI detector (solid line), for size determination, and a UV detector (dashed line), to illustrate overlap with absorbance readings at 494 nm.

### 2.1.2 DBCO-pDMAEMA<sub>n</sub>-Fl

Previously, SEC results of PFP-pDMAEMA<sub>n</sub> and DBCO-pDMAEMA<sub>n</sub> demonstrated no absorbance at 494 nm (Fig. S14). Following fluorescein conjugation to the thiol terminated region of DBCO-pDMAEMA<sub>n</sub>, SEC results demonstrated a dramatic increase in absorbance readings at 494 nm which also overlapped the size distribution profile (Fig. S12), providing confirmation of successful fluorescein attachment. Polymer:dye ratios (Table S3) were calculated using UV-Vis spectroscopy, Fig. S15.



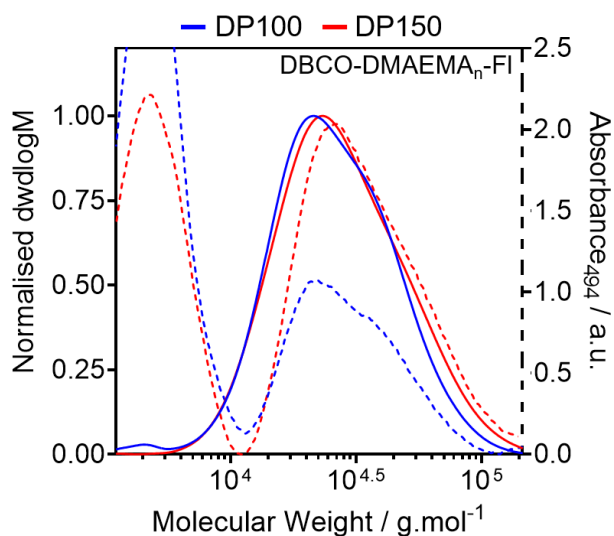

**Figure S15.** SEC measurements of DBCO-DMAEMA<sub>n</sub>-Fl polymers were recorded using an RI detector (solid line), for size determination, and a UV detector (dashed line), to illustrate overlap with absorbance readings at 494 nm.

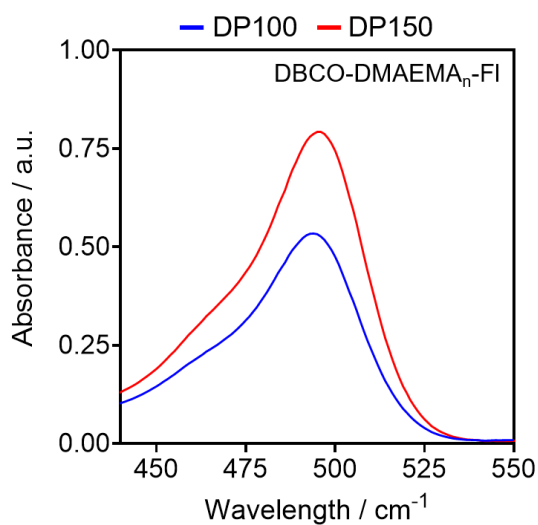

**Figure S16.** UV-Vis spectrum of FL-100 (0.17 mg.mL<sup>-1</sup>) and FL-150 (0.26 mg.mL<sup>-1</sup>) used to calculate polymer:dye ratios.

## 2.2 Resazurin Assays

### 2.2.1 DBCO-pDMAEMA<sub>n</sub> Resazurin Assays

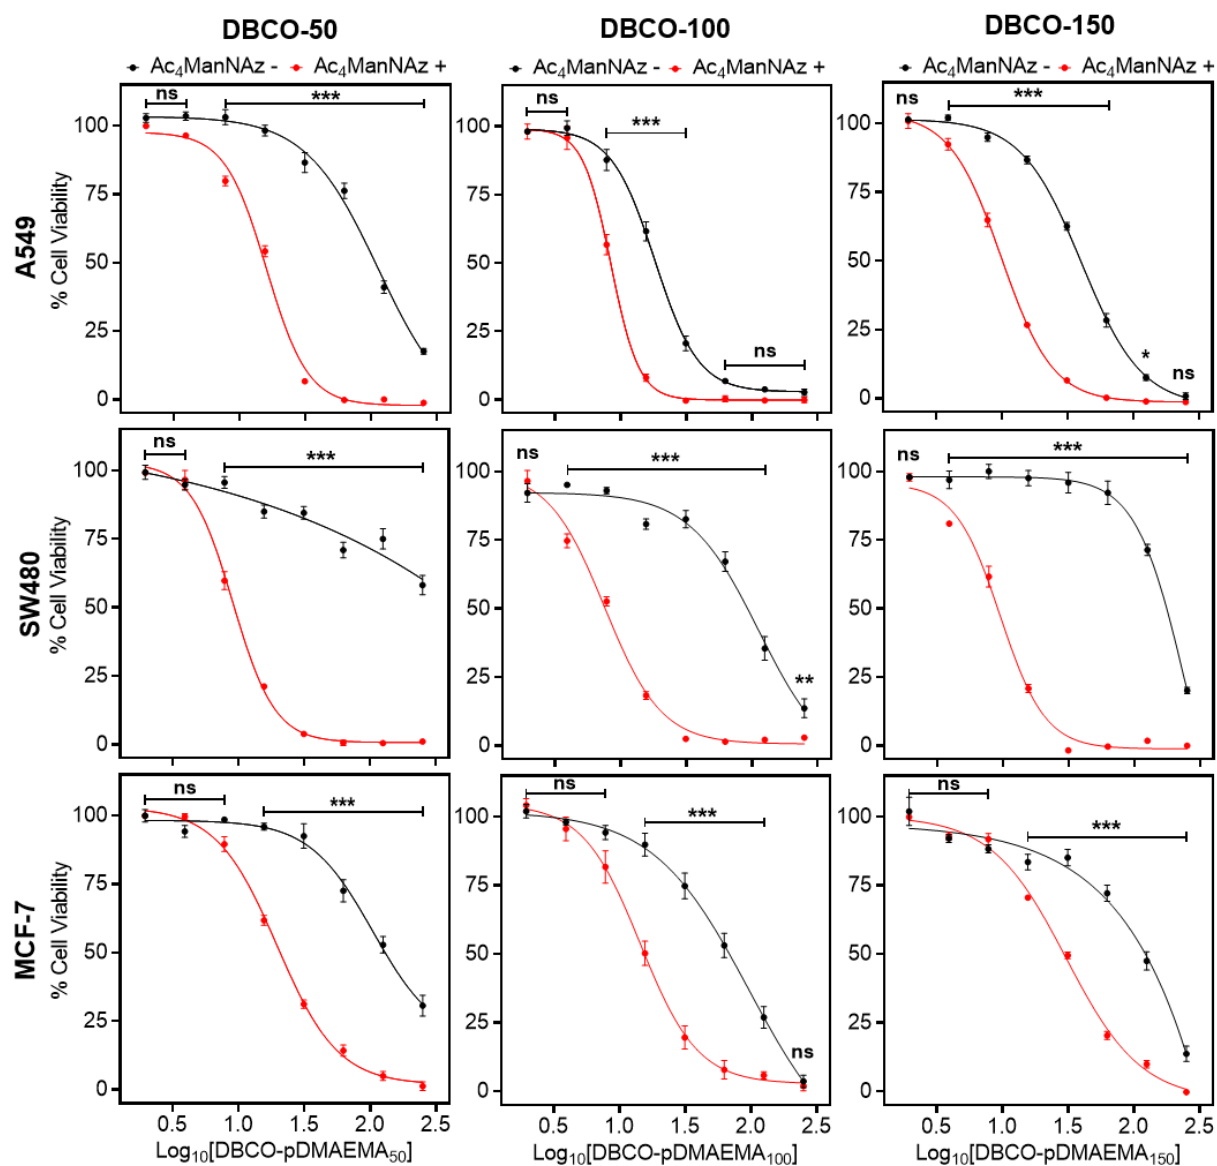

**Figure S17.** Dose-response curves for the percentage cell viability of A549, SW480 and MCF-7 cells untreated (**black**) or treated (**red**) with Ac<sub>4</sub>ManNAz (40  $\mu$ M, 96 h) and treated with DBCO-pDMAEMA<sub>n</sub> (2 – 250  $\mu$ g.mL<sup>-1</sup>, 2.5 h) ranging in chain lengths (**DBCO-50**, **DBCO-100** and **DBCO-150**). Cell viability was determined by resazurin assays and data is presented as mean % cell viability relative to control cells  $\pm$  SEM ( $n = 5$ ) from five independent repeats. Statistical analysis was performed comparing % cell viability of Ac<sub>4</sub>ManNAz untreated and treated cells at equal DBCO-pDMAEMA<sub>n</sub> concentrations. ns:  $p \geq 0.05$ , \*\*  $p \leq 0.01$ , \*\*\*  $p \leq 0.001$ .

### 2.2.2 Percentage Change in Resazurin $EC_{50}$ Values

**Table S4.** Percentage change in  $EC_{50}$  values of DBCO-pDMAEMA<sub>n</sub> with an Ac<sub>4</sub>ManNAz pretreatment. Values have been reported  $\pm$  SEM ( $n = 5$ ) from five independent repeats.  $EC_{50}$  values were determined from resazurin dose-response curves (Fig. S13) and have been reported in Table 1 (see article). The average % change and fold have been calculated across all polymer chain lengths.

|          | A549           |                 | SW480           |                | MCF-7           |                 |
|----------|----------------|-----------------|-----------------|----------------|-----------------|-----------------|
|          | %              | Fold            | %               | Fold           | %               | Fold            |
| DBCO-50  | 84.5 $\pm$ 3.6 | 6.45 $\pm$ 0.29 | > 100           | > 100          | 85.4 $\pm$ 12.5 | 6.86 $\pm$ 0.69 |
| DBCO-100 | 56.4 $\pm$ 5.6 | 2.29 $\pm$ 0.13 | 91.2 $\pm$ 13.7 | 11.3 $\pm$ 1.2 | 74.8 $\pm$ 12.0 | 3.97 $\pm$ 0.54 |
| DBCO-150 | 74.6 $\pm$ 5.3 | 3.94 $\pm$ 0.21 | 94.0 $\pm$ 1.6  | 16.7 $\pm$ 0.8 | 75.7 $\pm$ 10.0 | 4.11 $\pm$ 0.35 |
| Average  | 71.8 $\pm$ 8.2 | 4.23 $\pm$ 1.21 | 92.6 $\pm$ 1.1  | 14.0 $\pm$ 2.2 | 78.6 $\pm$ 3.4  | 4.98 $\pm$ 0.94 |

### 2.2.3 Doxorubicin Resazurin Assays

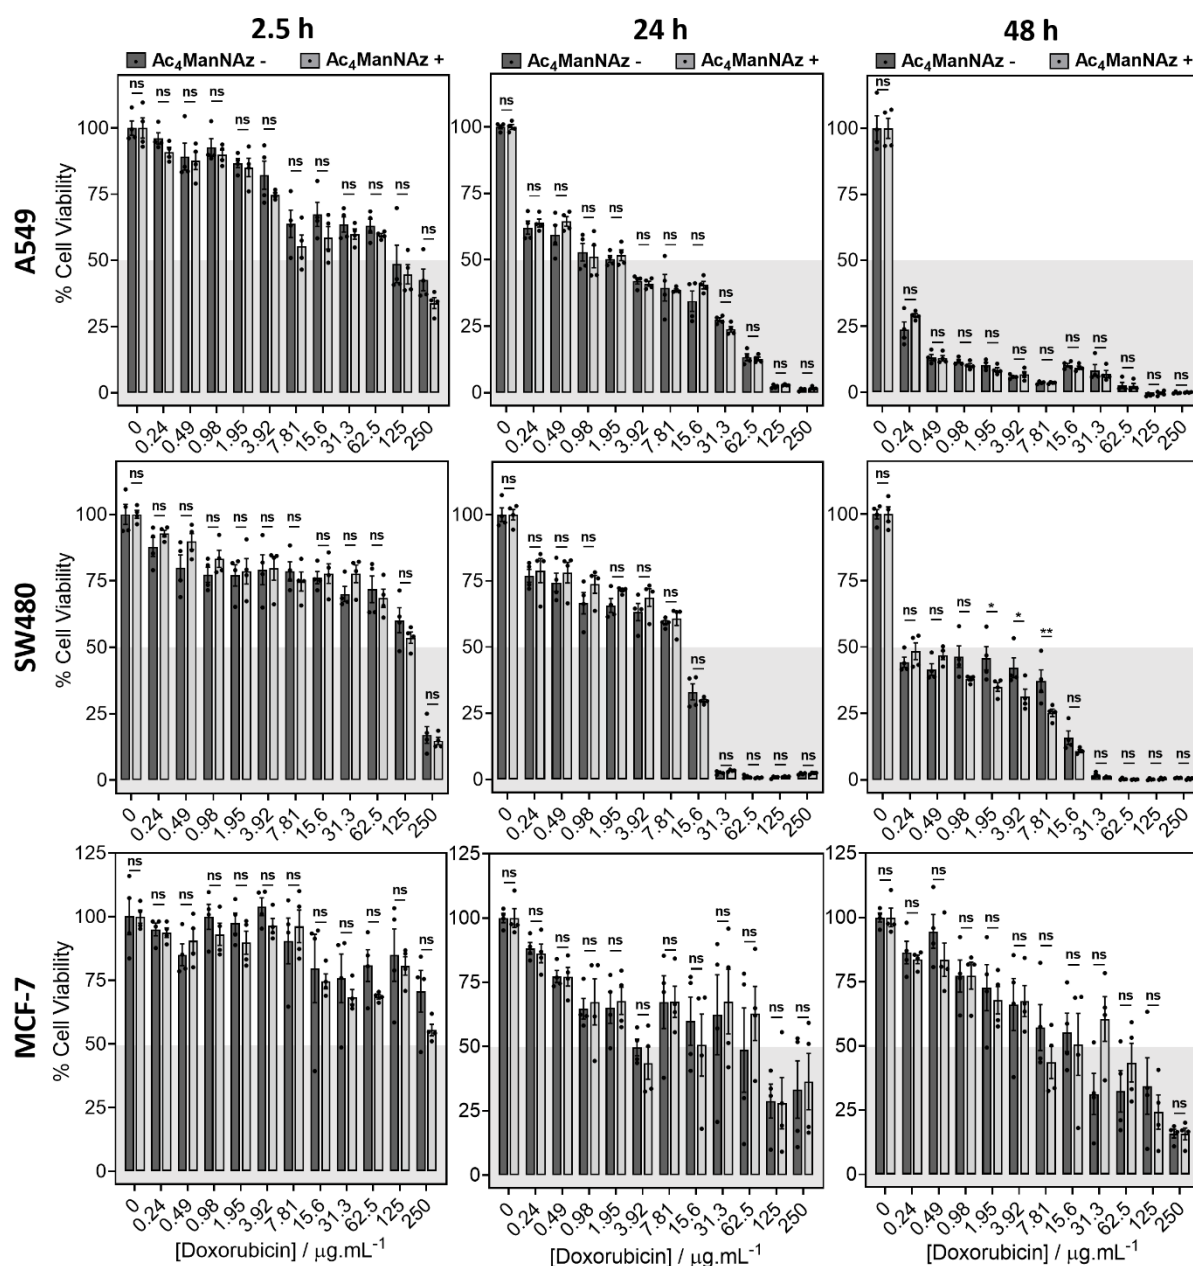

**Figure S18.** Percentage cell viability of A549, SW480 and MCF-7 cells untreated (dark grey) or treated (light grey) with  $Ac_4ManNAz$  ( $40 \mu M$ , 96 h) and treated with doxorubicin ( $0 - 250 \mu g.mL^{-1}$ , 2.5 h). Cell viability was determined by resazurin assays and data is presented as mean % cell viability relative to viable control cells  $\pm$  SEM ( $n = 4$ ) from four independent repeats. Statistical analysis was performed comparing % cell viability of  $Ac_4ManNAz$  untreated and treated cells at equal doxorubicin concentrations. ns:  $p \geq 0.05$ , \*\*  $p \leq 0.01$ .

## 2.3 Haemolysis Assays

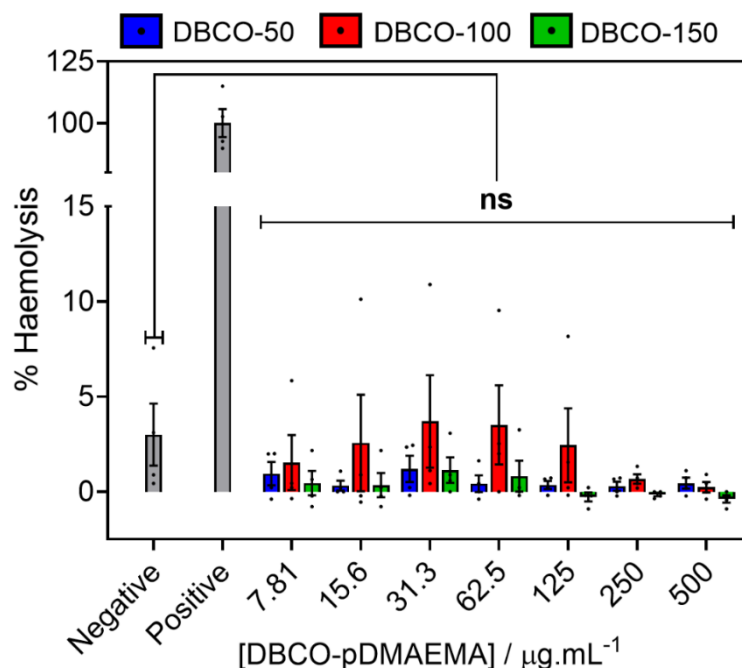

**Figure S19.** Haemolysis studies of DBCO-pDMAEMA<sub>n</sub> (0 – 500 µg.mL<sup>-1</sup>, 3 h) ranging in chain length (DBCO-50, DBCO-100 and DBCO-150) against ovine blood determined by an AHD575 assay. A negative control of ovine blood incubated in DPBS and a positive control of ovine blood incubated in lysis buffer (3 h) have been provided. The data is presented as average percentage haemolysis relative to a lysis control ± SEM (n = 4) from four independent repeats. Statistical analysis was performed comparing all polymer treatments against blood incubated in DPBS alone (3 h). ns: p ≥ 0.05.

## 2.4 LDH Assay

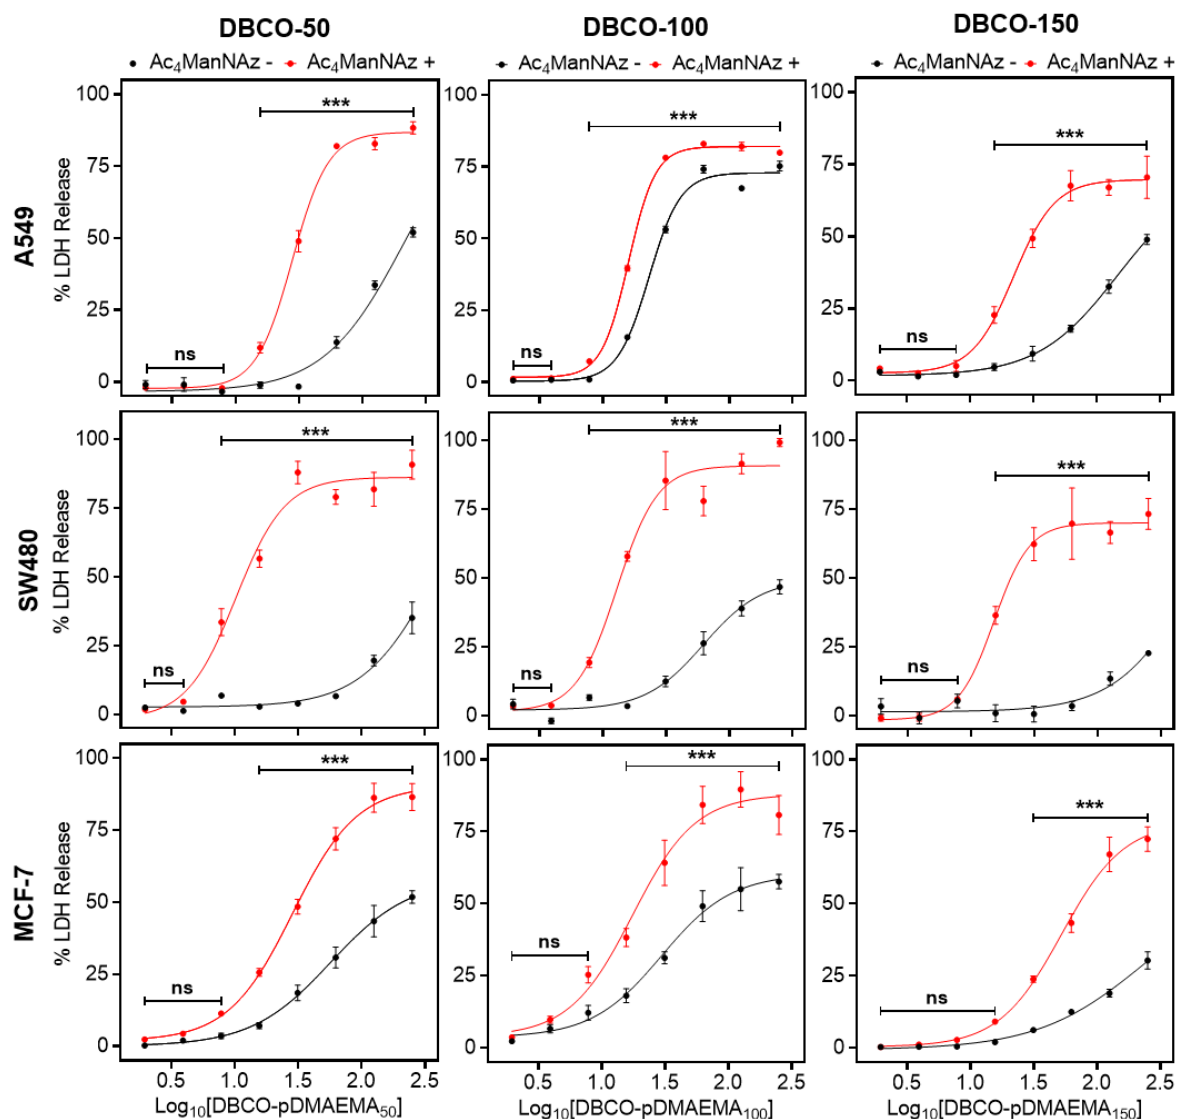

**Figure S20.** Percentage lactate dehydrogenase (% LDH) release of cells (A549, SW480 and MCF-7) either untreated (black) or treated (red) with Ac<sub>4</sub>ManNAz (40  $\mu$ M, 96 h) and subsequently treated with DBCO-pDMAEMA<sub>n</sub> (2 – 250  $\mu$ g.mL<sup>-1</sup>, 2.5 h) ranging in length (DBCO-50, DBCO-100 and DBCO-150). Mean % LDH release was reported relative to a positive lysis control  $\pm$  SEM ( $n = 3$ ) from three independent repeats. Statistical analysis was performed comparing % LDH release of Ac<sub>4</sub>ManNAz untreated and treated cells at equal DBCO-pDMAEMA<sub>n</sub> concentrations. ns:  $p \geq 0.05$ , \*\*\*  $p \leq 0.001$ .



## 2.5 Live/ Dead Assays

### 2.5.1 Live/ Dead Example Images

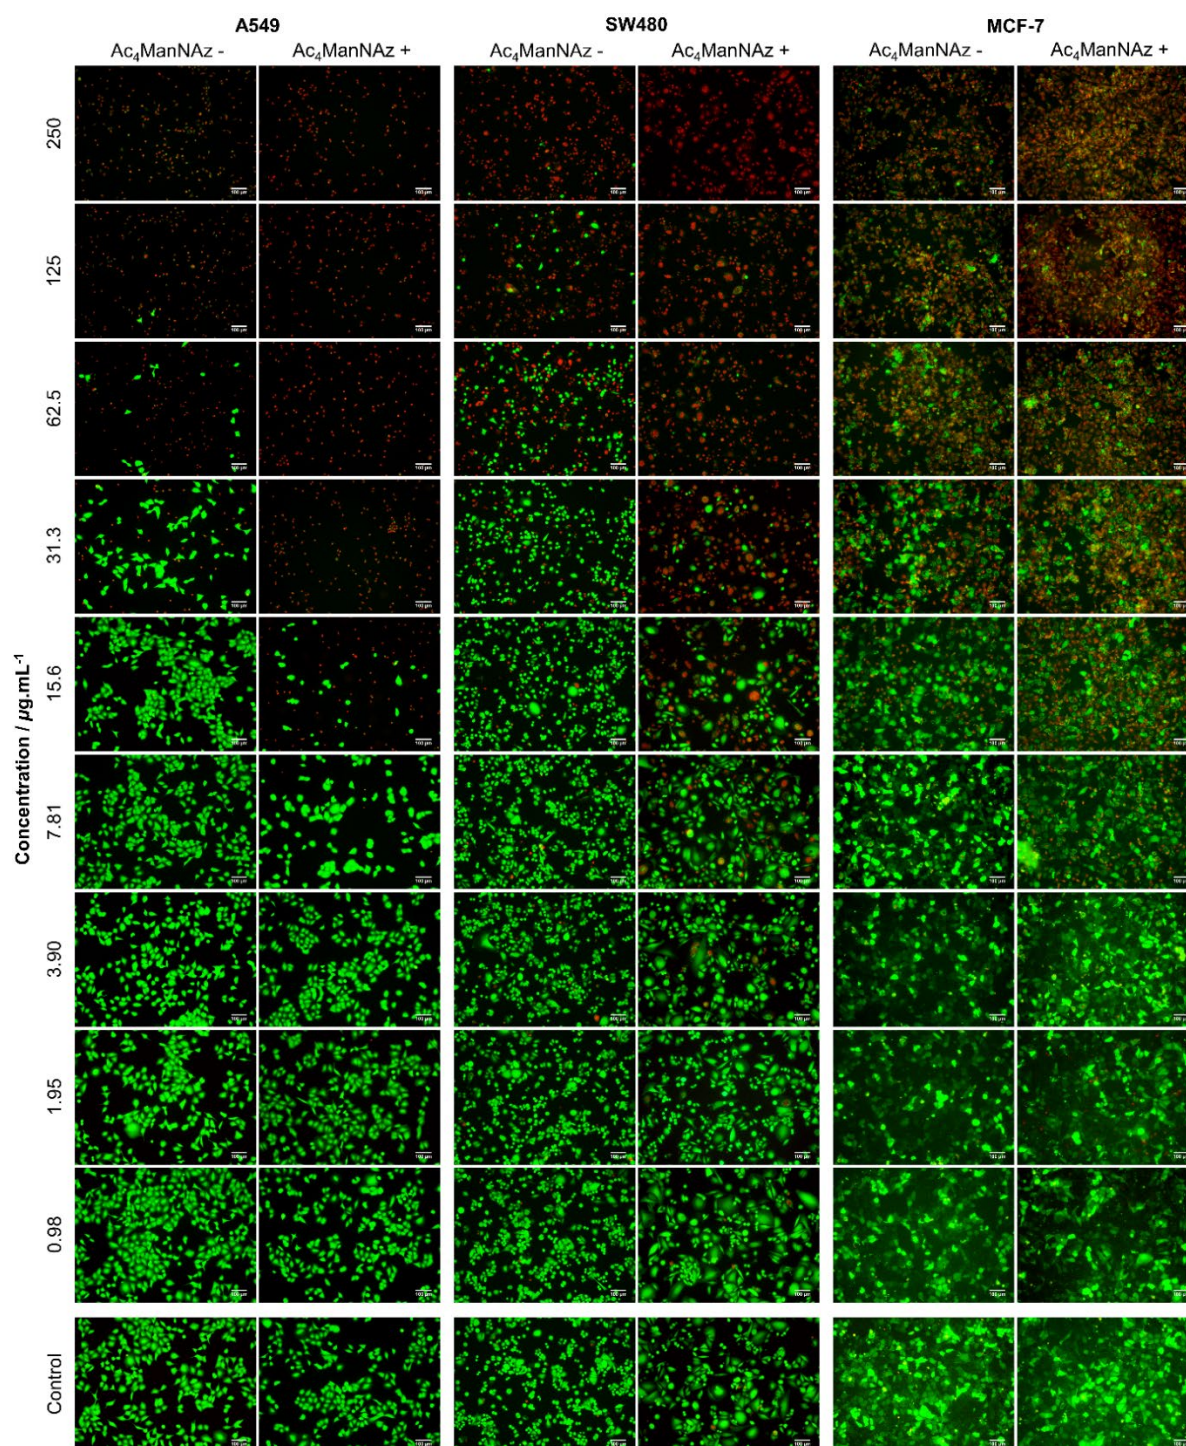

**Figure S21.** Sample merged Live/ Dead images of 3 cell types (A549, SW480 and MCF-7) either untreated (-) or treated (+) with  $\text{Ac}_4\text{ManNAz}$  (40  $\mu\text{M}$ , 96 h) and subsequently treated with DBCO-pDMAEMA<sub>100</sub> (DBCO-100, 1 – 250  $\mu\text{g.mL}^{-1}$ , 2.5 h). Scale bar = 100  $\mu\text{m}$ . Green = calcein (healthy). Red = ethidium iodide (dead).



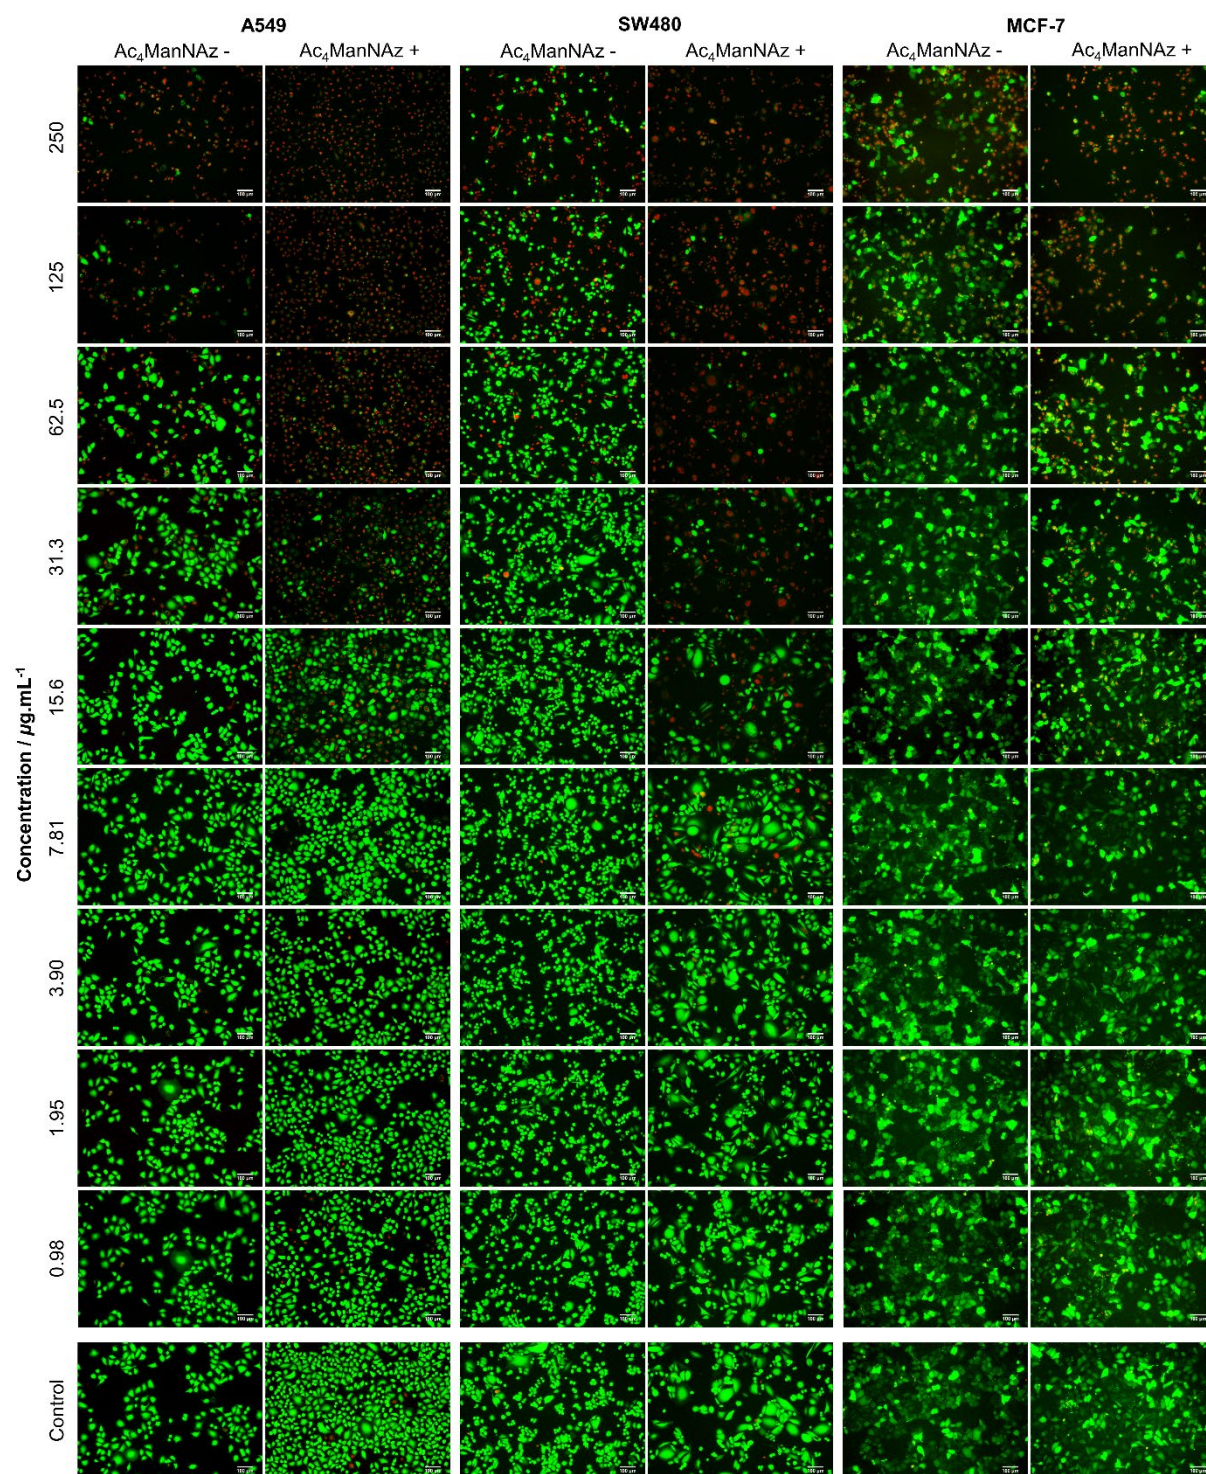

**Figure S22.** Sample merged Live/ Dead images of 3 cell types (A549, SW480 and MCF-7) either untreated (-) or treated (+) with Ac<sub>4</sub>ManNAz (40 µM, 96 h) and subsequently treated with DBCO-pDMAEMA<sub>150</sub> (**DBCO-150**, 1 – 250 µg.mL<sup>-1</sup>, 2.5 h). Scale bar = 100 µm. Green = calcein (healthy). Red = ethidium iodide (dead).



## 2.5.2 Live/ Dead Percentage Live Cells

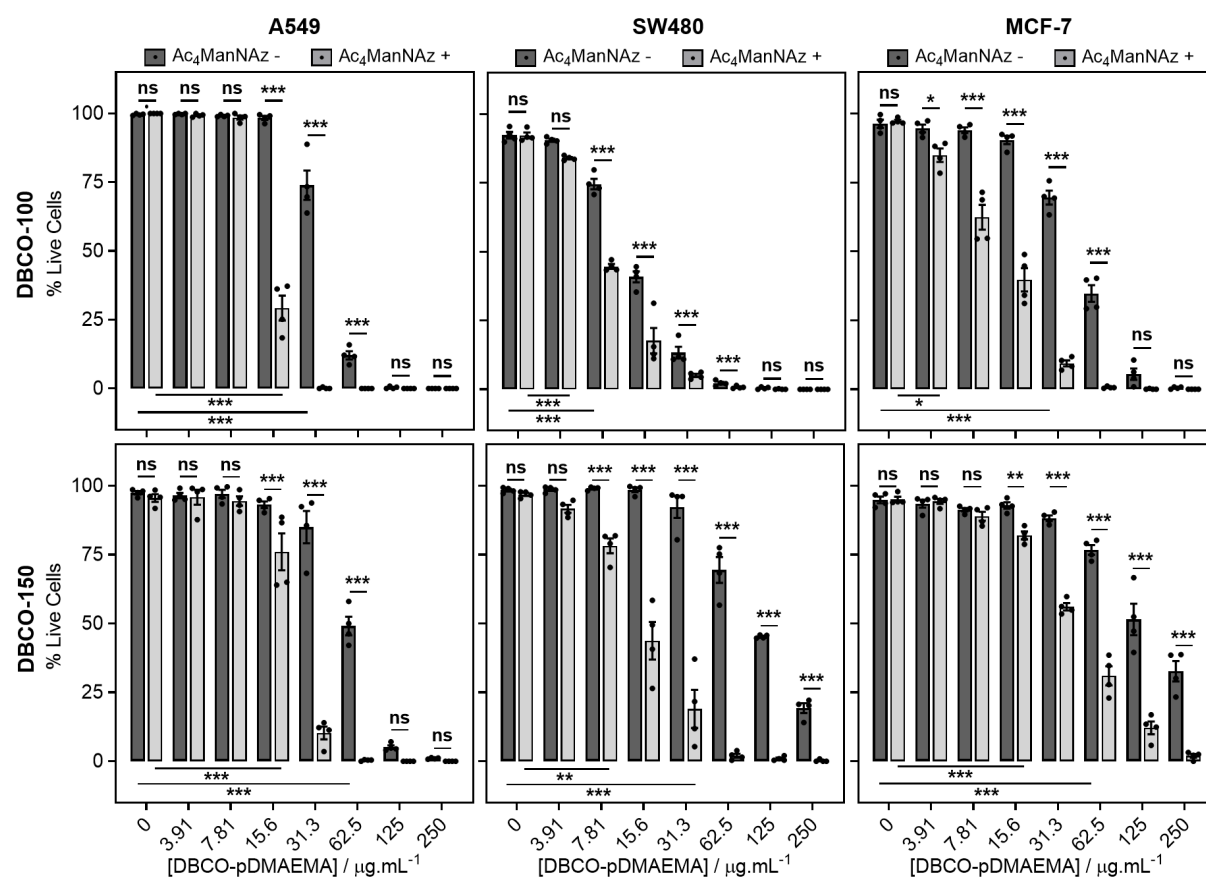

**Figure S23.** Percentage live cell count of 3 cell types (A549, SW480 and MCF-7) either untreated (**dark grey**) or treated (**light grey**) with Ac<sub>4</sub>ManNAz (40 µM, 96 h) and subsequently treated with DBCO-pDMAEMA<sub>n</sub> (0 – 250 µg.mL<sup>-1</sup>, 2.5 h) ranging in length (**DBCO-100** and **DBCO-150**). Percentage live cells was determined through live/ dead staining and reported relative to the total number of live and dead cells counts ± SEM (n = 4) from four independent repeats. Statistical analysis was performed by comparing each DBCO-pDMAEMA<sub>n</sub> concentration treatment with the respective negative control (**below bars**) and also comparing Ac<sub>4</sub>ManNAz treated and untreated cells at each individual polymer concentration treatment (**above bars**). ns:  $p \geq 0.05$ , \*  $p \leq 0.05$ , \*\*  $p \leq 0.01$ , \*\*\*  $p \leq 0.001$ .

### 2.5.3 Percentage Change in Live/ Dead $EC_{50}$ Values

**Table S5.** Percentage change in  $EC_{50}$  values of DBCO- $pDMAEMA_n$  with an  $Ac_4ManNAz$  pretreatment.  $EC_{50}$  values were determined from Live/ Dead dose-response curves (Fig. 2C, see article) and have been reported in Table 1 (see article).

|          | A549           |                 | SW480          |                 | MCF-7           |                 |
|----------|----------------|-----------------|----------------|-----------------|-----------------|-----------------|
|          | %              | Fold            | %              | Fold            | %               | Fold            |
| DBCO-100 | $65.1 \pm 5.7$ | $2.86 \pm 0.15$ | $75.9 \pm 5.2$ | $4.15 \pm 0.41$ | $42.0 \pm 3.2$  | $1.72 \pm 0.07$ |
| DBCO-150 | $66.5 \pm 2.1$ | $2.99 \pm 0.13$ | $86.5 \pm 4.2$ | $7.38 \pm 0.87$ | $74.5 \pm 13.3$ | $3.93 \pm 0.47$ |

## 2.6 Annexin/ PI

### 2.6.1 Annexin/ PI Images

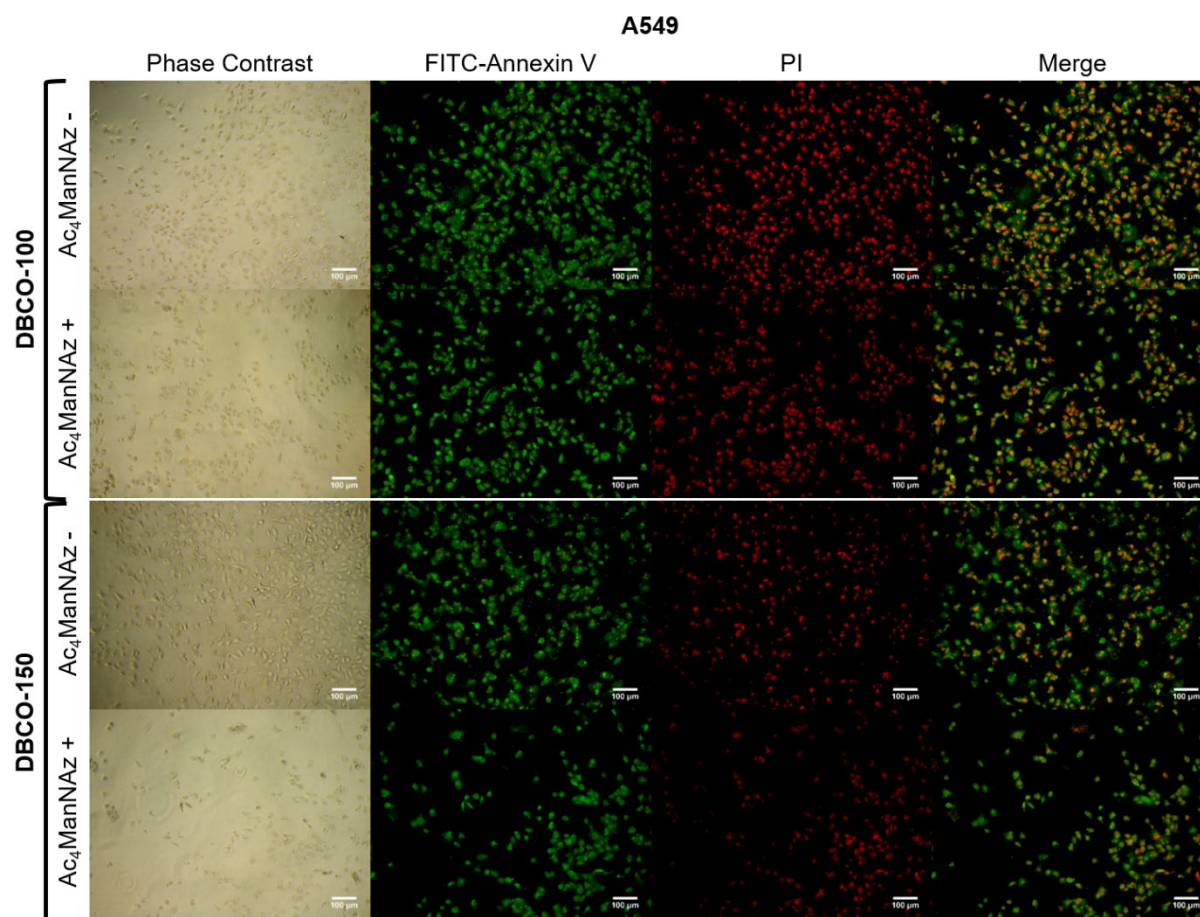

**Figure S24.** A549 untreated (-) and treated (+) with Ac<sub>4</sub>ManNAz (40 μM, 96 h) and treated with DBCO-pDMAEMA<sub>100/150</sub> (**DBCO-100** or **DBCO-150**, 2.5 h) were stained with FITC Annexin V and PI immediately after the treatments. The concentrations used were determined using the resazurin assay (Fig. 2A) at the point where cell viability was reduced by 90% (EC<sub>90</sub>). Scale bar = 100 μm. Green = FITC Annexin V. Red = propidium iodide (PI).

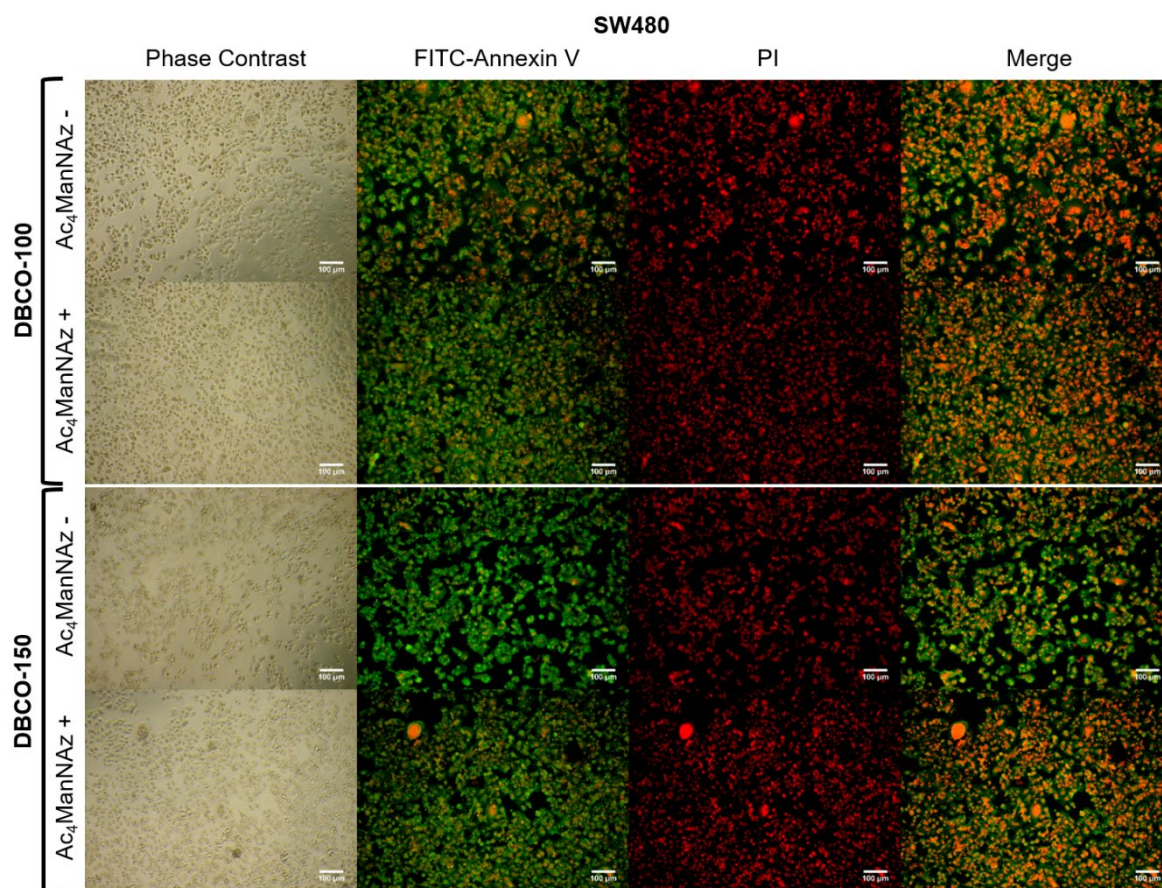

**Figure S25.** SW480 untreated (-) and treated (+) with Ac<sub>4</sub>ManNAz (40 μM, 96 h) and treated with DBCO-pDMAEMA<sub>100/150</sub> (**DBCO-100** or **DBCO-150**, 2.5 h) were stained with FITC Annexin V and PI immediately after the treatments. The concentrations used were determined using the resazurin assay (Fig. 2A) at the point where cell viability was reduced by 90% (EC<sub>90</sub>). Scale bar = 100 μm. Green = FITC Annexin V. Red = propidium iodide (PI).



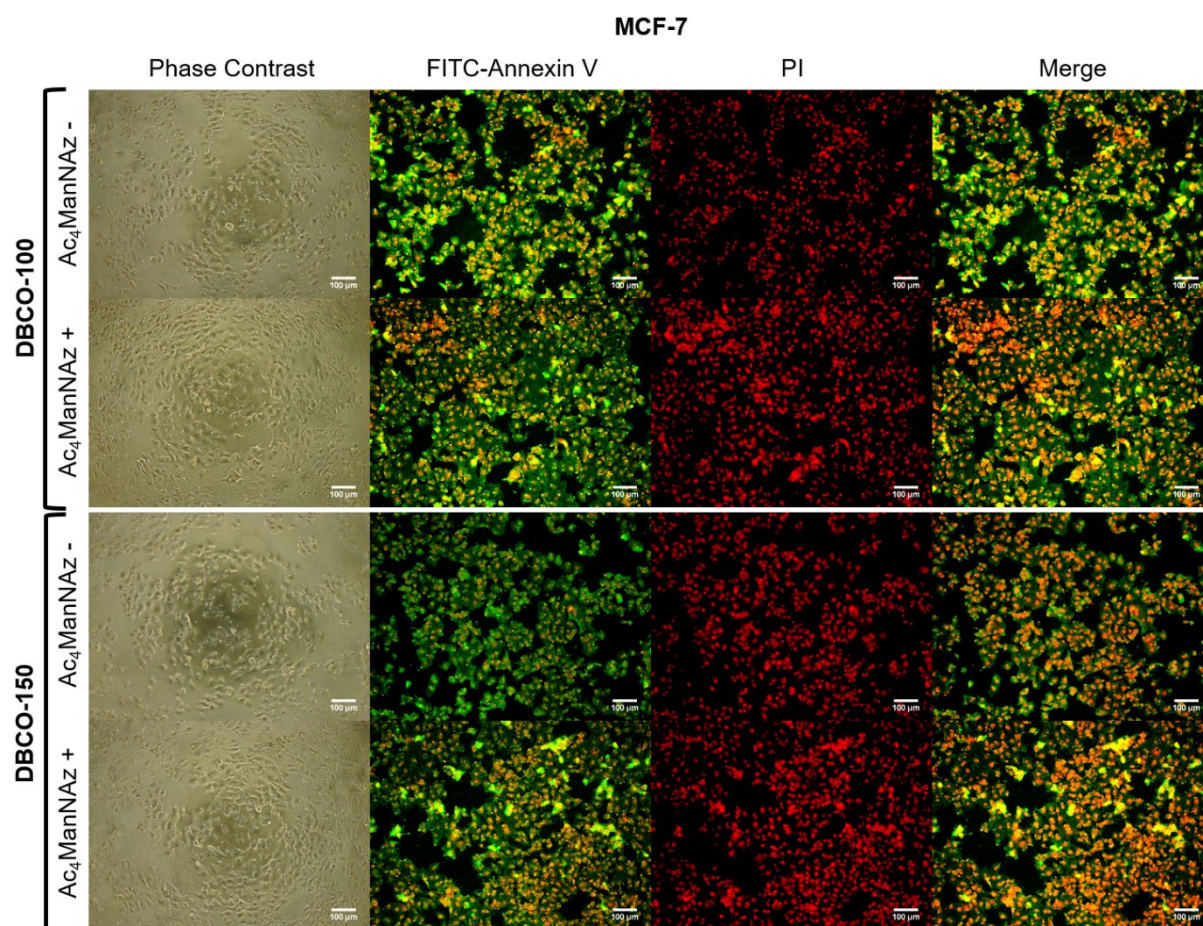

**Figure S26.** MCF-7 untreated (-) and treated (+) with Ac<sub>4</sub>ManNAz (40 μM, 96 h) and treated with DBCO-pDMAEMA<sub>100/150</sub> (**DBCO-100** or **DBCO-150**, 2.5 h) were stained with FITC Annexin V and PI immediately after the treatments. The concentrations used were determined using the resazurin assay (Fig. 2A) at the point where cell viability was reduced by 90% (EC<sub>90</sub>). Scale bar = 100 μm. Green = FITC Annexin V. Red = propidium iodide (PI).

## 2.7 Caspase-3/7 Kinetics Apoptosis Assay

### 2.7.1 Caspase-3/7 example images

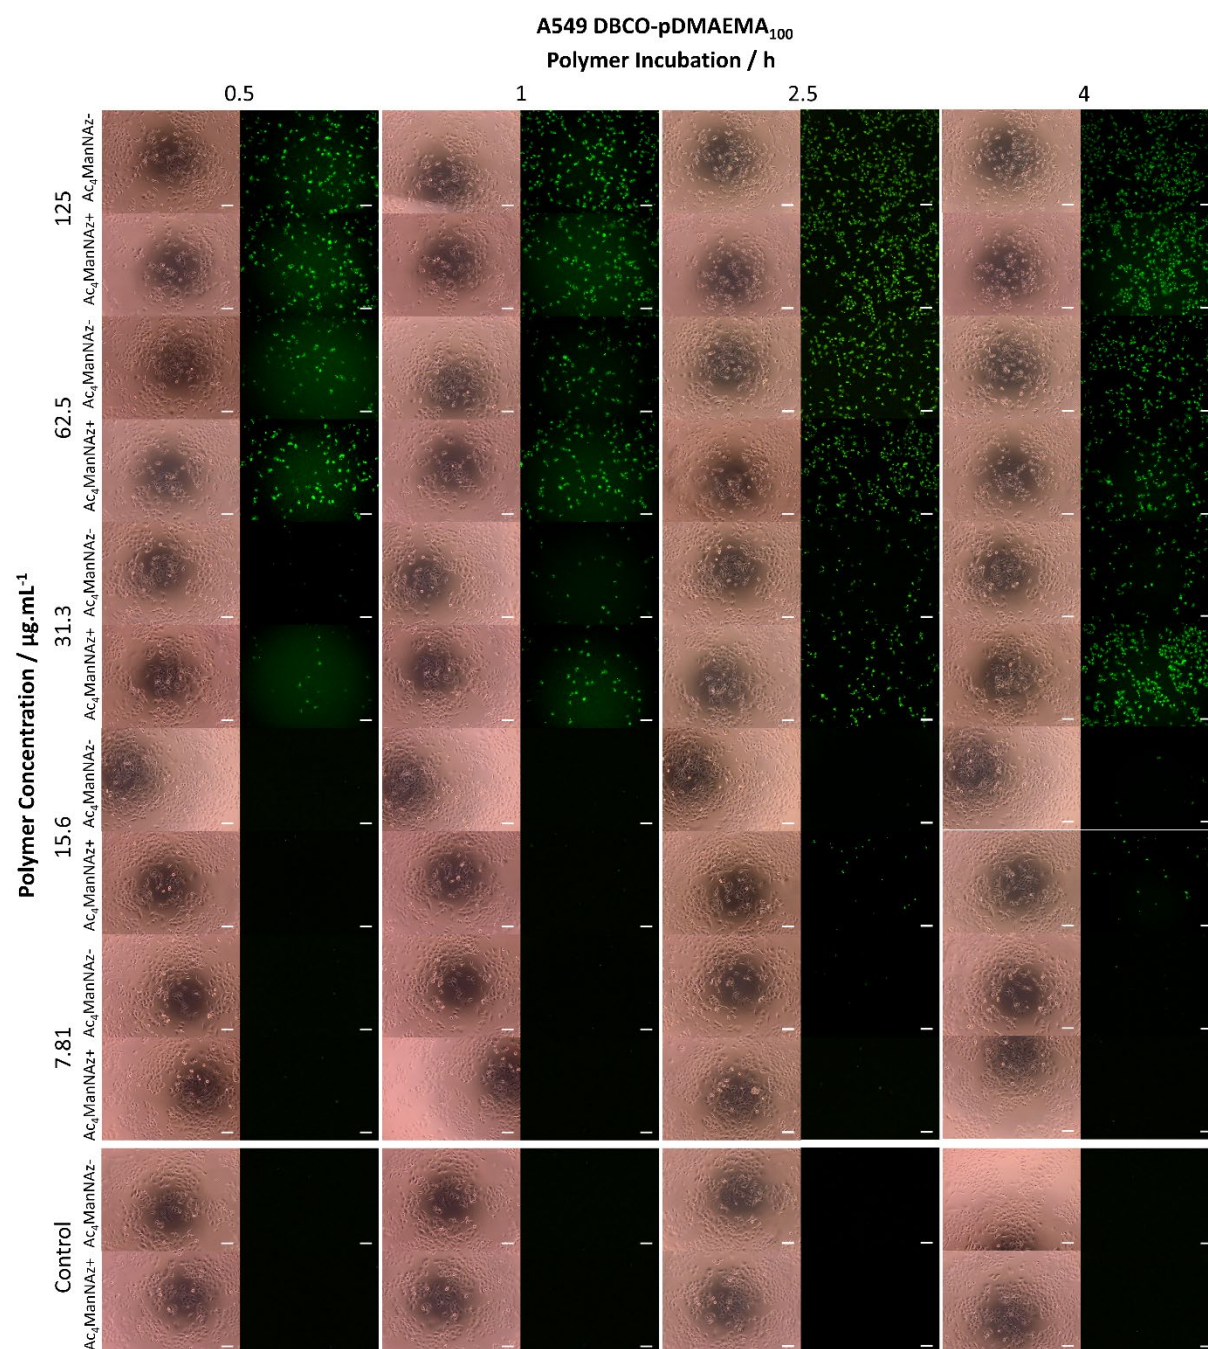

**Figure S27.** Sample images of A549 cells treated (+) or untreated (-) with  $Ac_4ManNAz$  (40  $\mu M$ , 96 h) and incubated with DBCO-pDMAEMA<sub>100</sub> (**DBCO-100**, 0 – 125  $\mu g.mL^{-1}$ ) and CellEvent Caspase-3/7 Detection Reagent for 4h. Images were taken at 0.5, 1, 2.5 and 4 h time points. Images of cells incubated with CellEvent Caspase-3/7 Detection Reagent alone in cell media were provided as control viable cells. Scale bar = 100  $\mu m$ . Green = caspase positive cells.



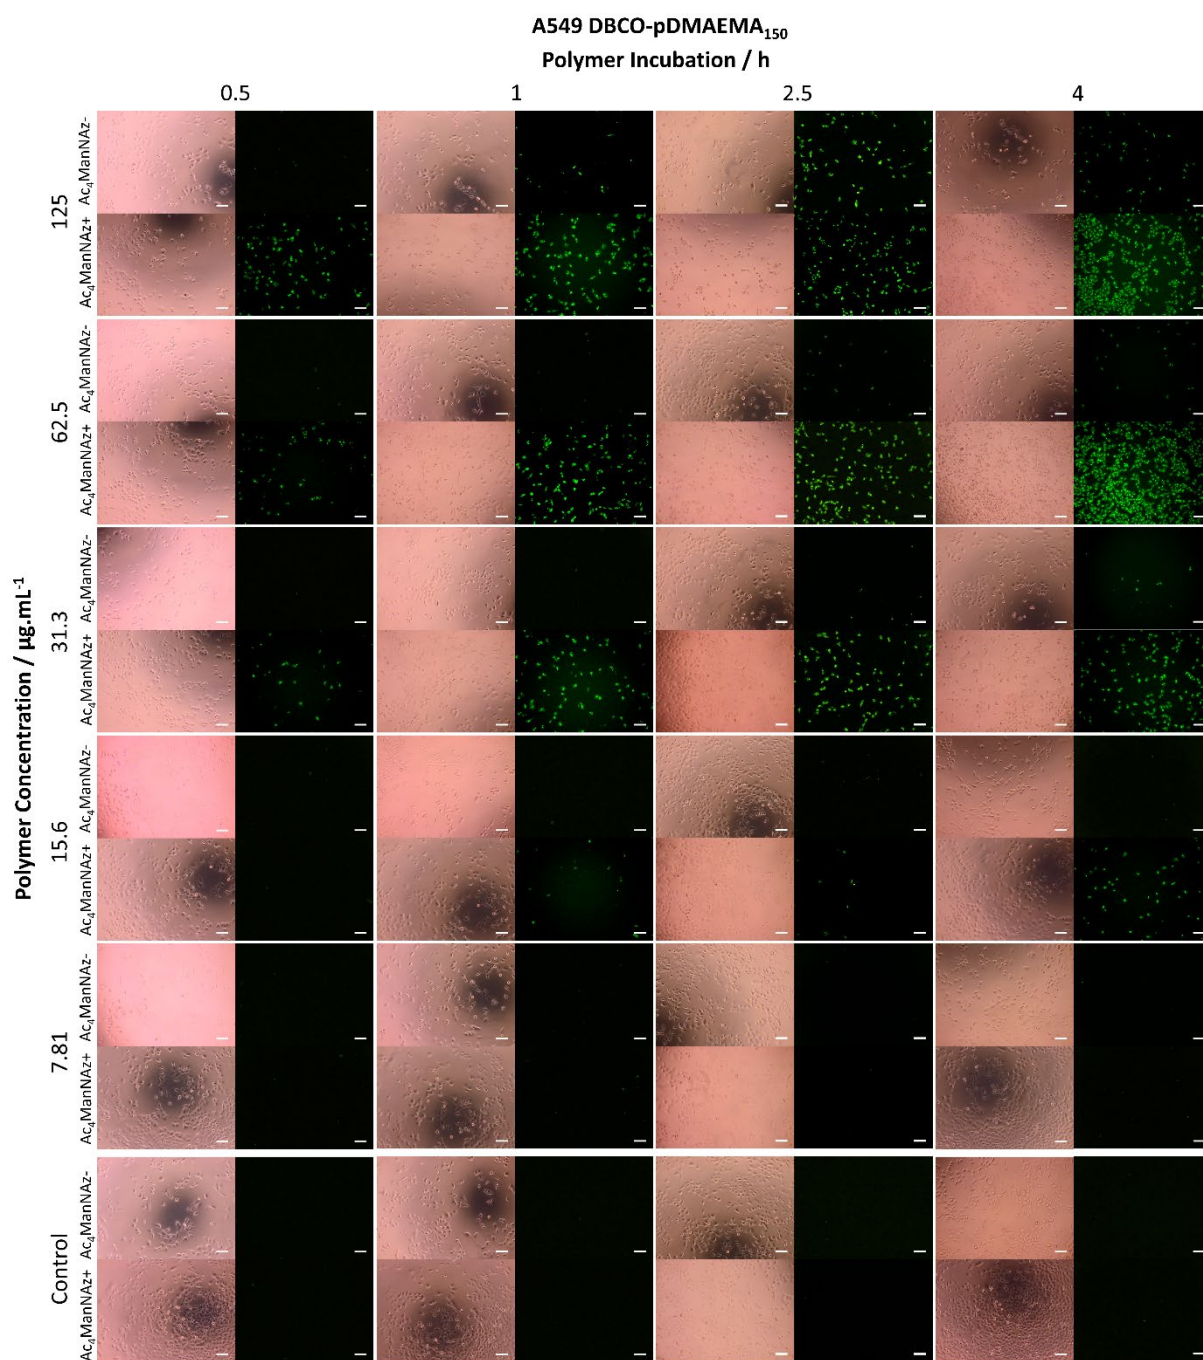

**Figure S28.** Sample images of A549 cells treated (+) or untreated (-) with Ac<sub>4</sub>ManNAz (40  $\mu\text{M}$ , 96 h) and incubated with DBCO-pDMAEMA<sub>150</sub> (**DBCO-150**, 0 – 125  $\mu\text{g.mL}^{-1}$ ) and CellEvent Caspase-3/7 Detection Reagent for 4h. Images were taken at 0.5, 1, 2.5 and 4 h time points. Images of cells incubated with CellEvent Caspase-3/7 Detection Reagent alone in cell media were provided as control viable cells. Scale bar = 100  $\mu\text{m}$ . Green = caspase positive cells.

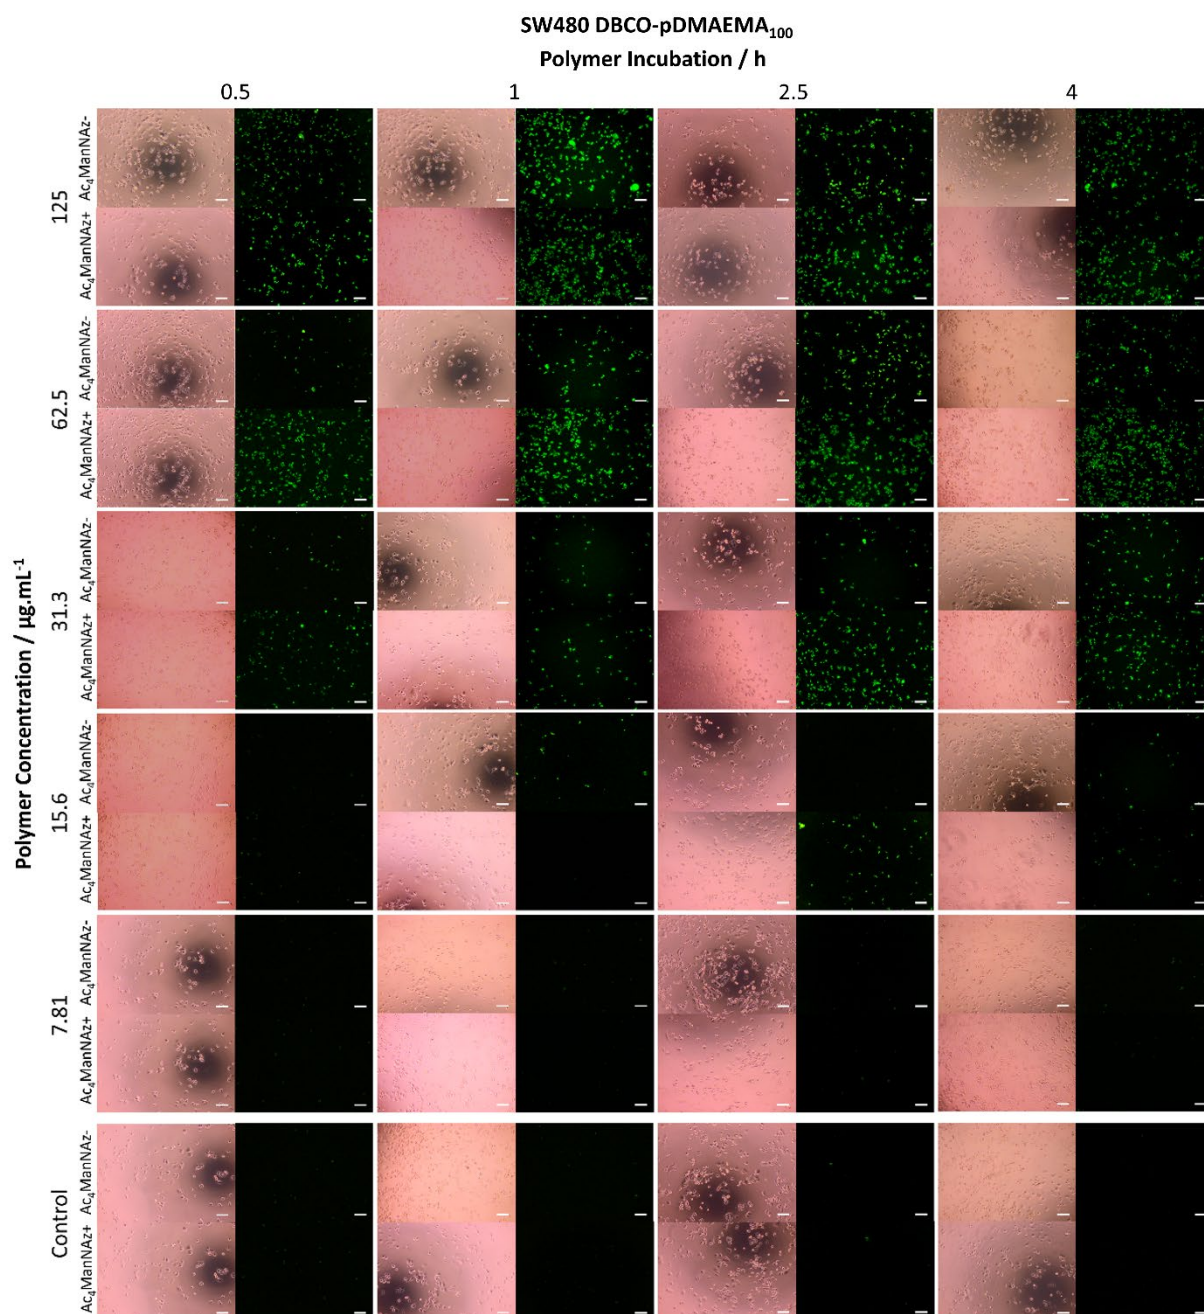

**Figure S29.** Sample images of SW480 cells treated (+) or untreated (-) with Ac<sub>4</sub>ManNAz (40  $\mu\text{M}$ , 96 h) and incubated with DBCO-pDMAEMA<sub>100</sub> (**DBCO-100**, 0 – 125  $\mu\text{g.mL}^{-1}$ ) and CellEvent Caspase-3/7 Detection Reagent for 4h. Images were taken at 0.5, 1, 2.5 and 4 h time points. Images of cells incubated with CellEvent Caspase-3/7 Detection Reagent alone in cell media were provided as control viable cells. Scale bar = 100  $\mu\text{m}$ . Green = caspase positive cells.



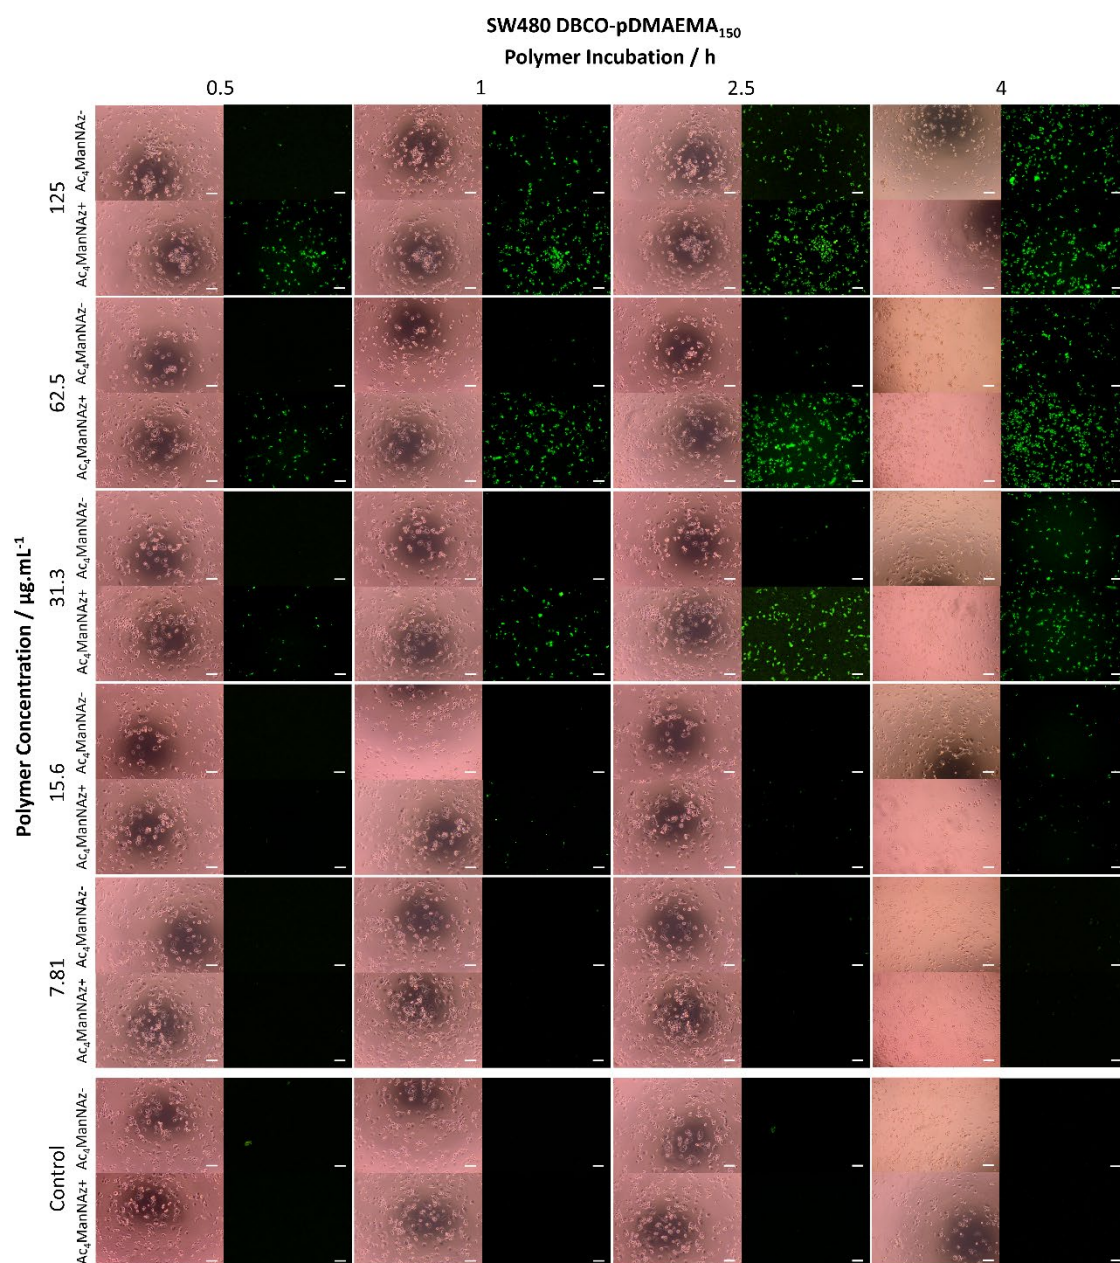

**Figure S30.** Sample images of SW480 cells treated (+) or untreated (-) with Ac<sub>4</sub>ManNAz (40  $\mu\text{M}$ , 96 h) and incubated with DBCO-pDMAEMA<sub>150</sub> (**DBCO-150**, 0 – 125  $\mu\text{g.mL}^{-1}$ ) and CellEvent Caspase-3/7 Detection Reagent for 4h. Images were taken at 0.5, 1, 2.5 and 4 h time points. Images of cells incubated with CellEvent Caspase-3/7 Detection Reagent alone in cell media were provided as control viable cells. Scale bar = 100  $\mu\text{m}$ . Green = caspase positive cells.

### 2.7.2 Caspase EC<sub>50</sub> Values

**Table S6.** EC<sub>50</sub> values of DBCO-*p*DMAEMA<sub>100/150</sub> (2.5 h incubation) against Ac<sub>4</sub>ManNAz treated (+) and untreated (-) A549 and SW480 cell lines determined by the percentage of caspase-3/7 positive cells seen in Figures S23 – S26.

|          | A549         |            | SW480       |            |
|----------|--------------|------------|-------------|------------|
|          | -            | +          | -           | +          |
| DBCO-100 | 72.4 ± 4.7   | 41.5 ± 3.0 | 68.0 ± 5.2  | 32.5 ± 1.6 |
| DBCO-150 | 160.9 ± 10.7 | 54.4 ± 4.5 | 134.4 ± 4.2 | 34.6 ± 2.6 |

## 2.8 Polymer Grafting and Degrafting

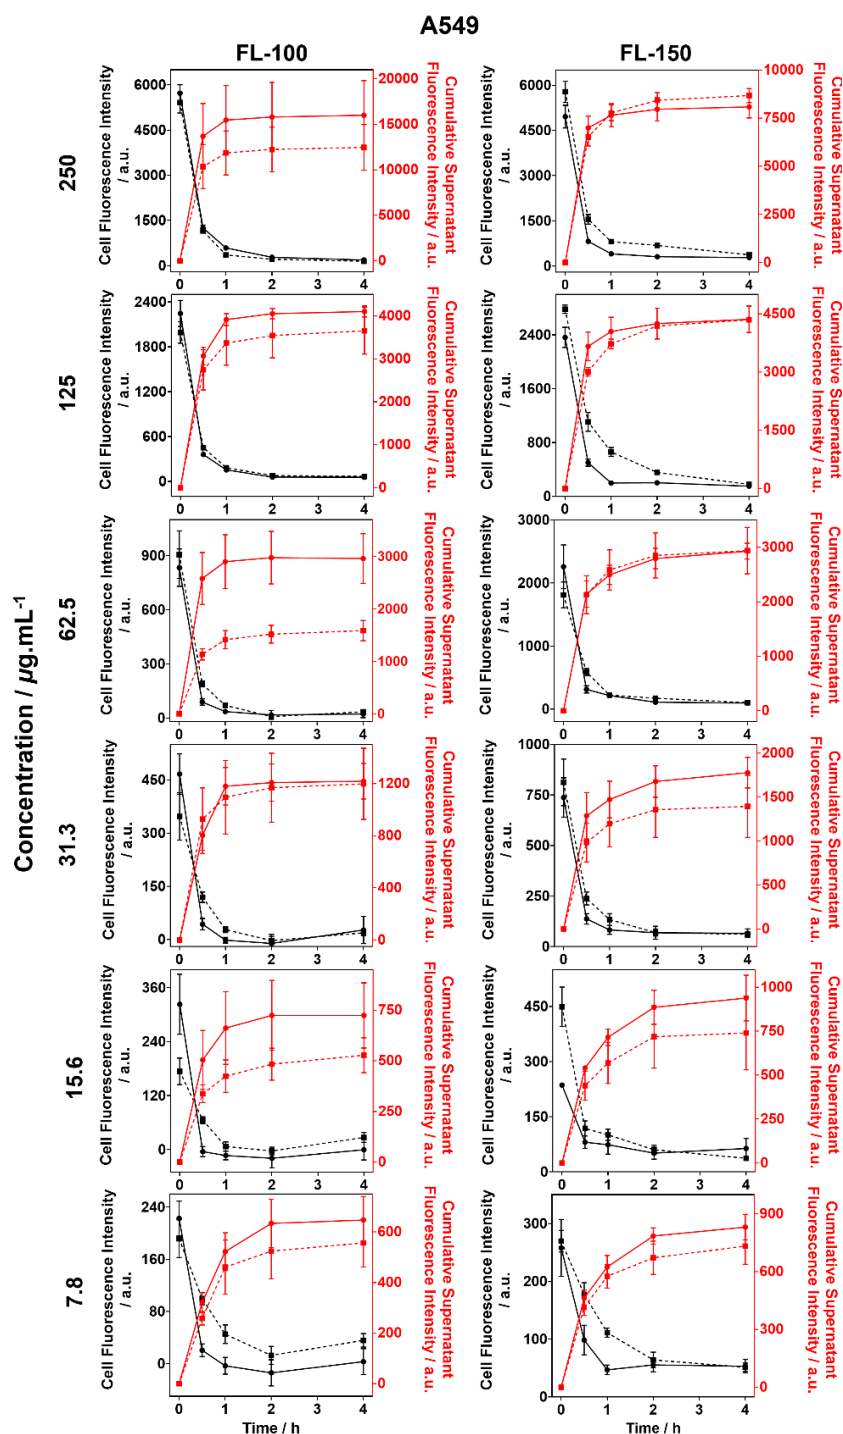

**Figure S31.** Polymer degrafting from A549 cell surface. Fluorescence measurements of A549 cells either untreated (**solid line**) or treated (**dashed line**) with  $\text{Ac}_4\text{ManNAz}$  (40  $\mu\text{M}$ , 96 h) and treated with  $\text{DBCO-pDMAEMA}_n\text{-Fl}$  (7.8 – 250  $\mu\text{g.mL}^{-1}$ , 2.5 h) ranging in length (**FL-100** and **FL-150**) were recorded 0 – 4 h post-treatment (**black**). The supernatant was removed at each time point and the cumulative fluorescence intensity (**red**) was plotted. Data is reported as mean fluorescence intensity  $\pm$  SEM ( $n = 4$ ) from four independent repeats.

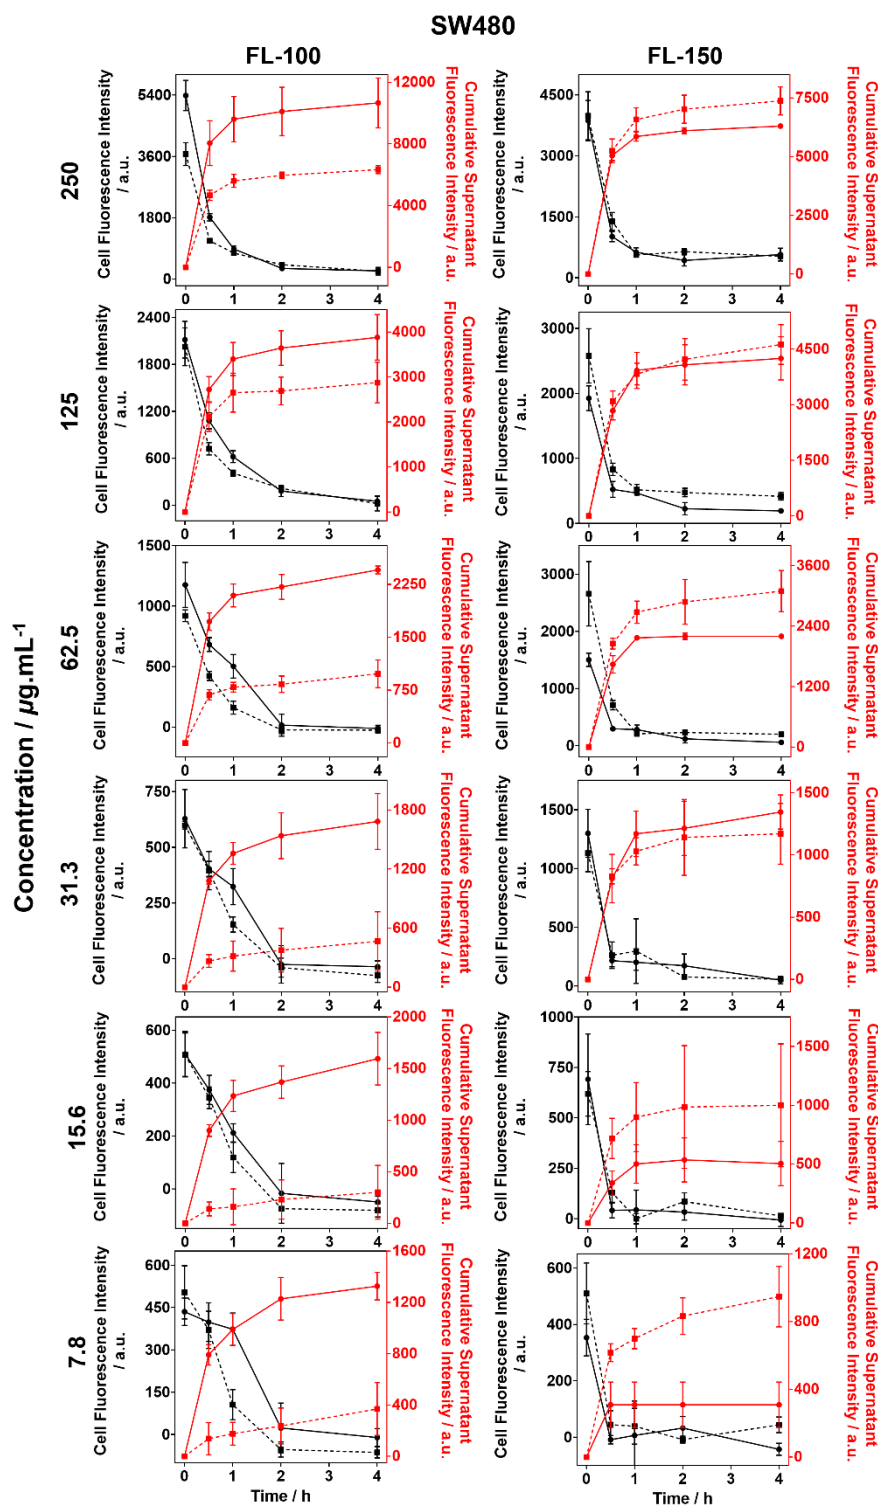

**Figure S32.** Polymer degrafting from SW480 cell surface. Fluorescence measurements of A549 cells either untreated (*solid line*) or treated (*dashed line*) with  $\text{Ac}_4\text{ManNAz}$  (40  $\mu\text{M}$ , 96 h) and treated with  $\text{DBCO-pDMAEMA}_n\text{-Fl}$  (7.8 – 250  $\mu\text{g.mL}^{-1}$ , 2.5 h) ranging in length (**FL-100** and **FL-150**) were recorded 0 – 4 h post-treatment (*black*). The supernatant was removed at each time point and the cumulative fluorescence intensity (*red*) was plotted. Data is reported as mean fluorescence intensity  $\pm$  SEM ( $n = 4$ ) from four independent repeats.



## 2.9 Confocal Monolayer – Polymer Grafting and Membrane Damage

### 2.9.1 Polymer Grafting Maximum Intensity Projection Images

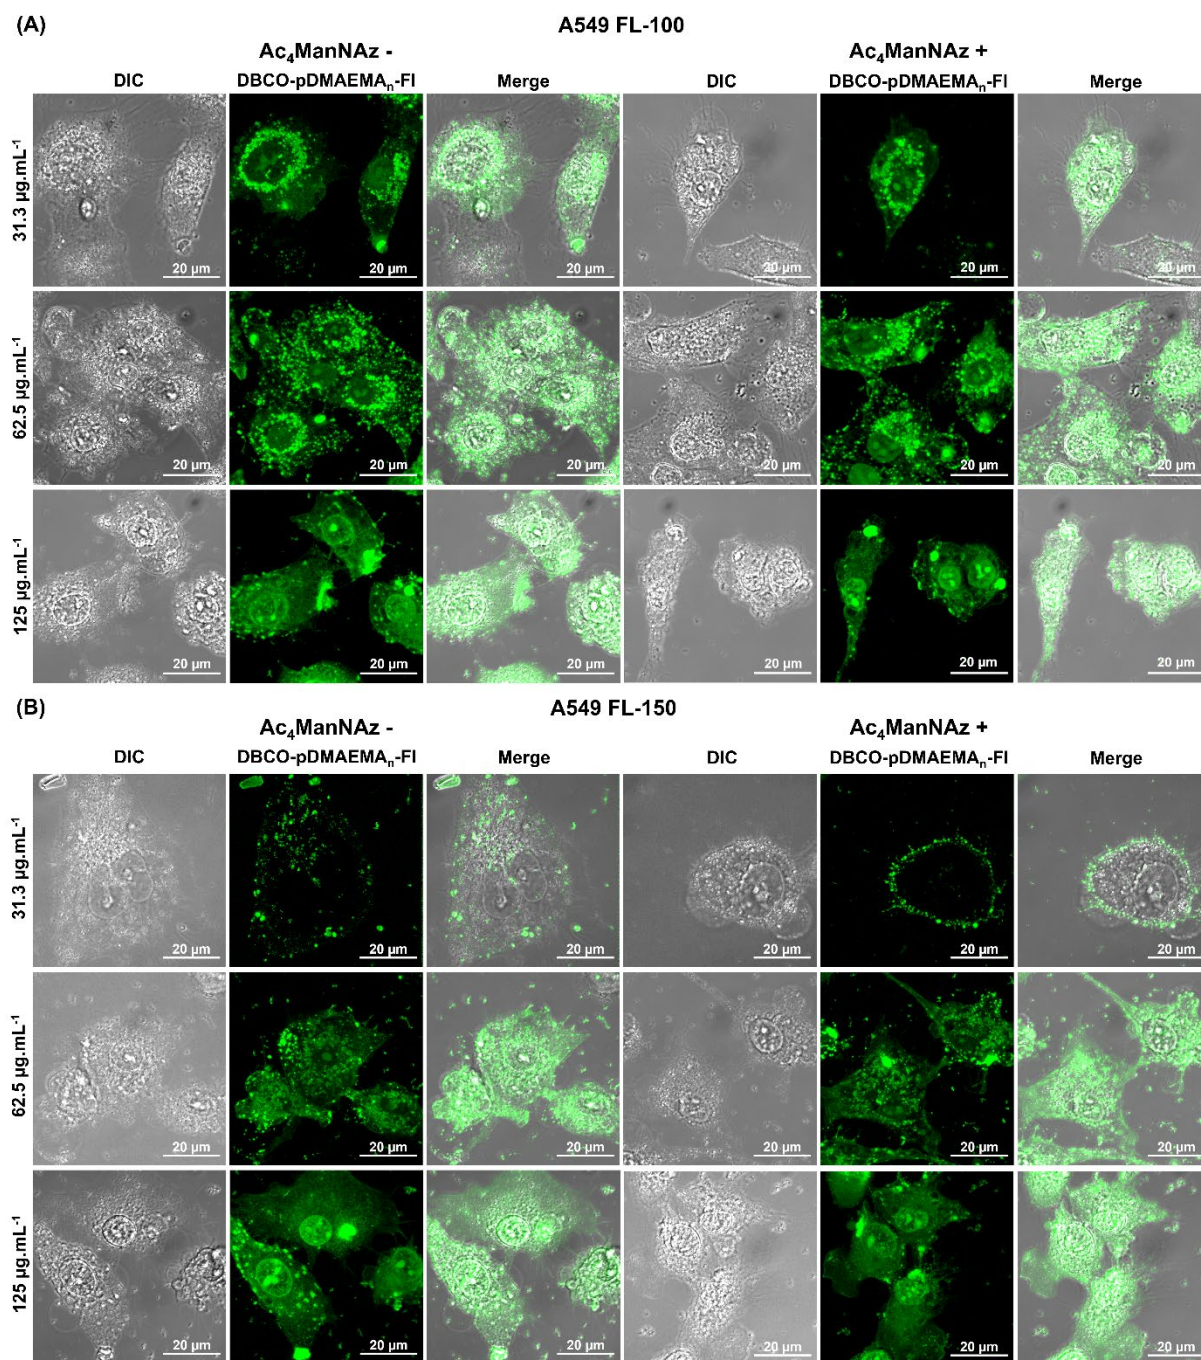

**Figure S33.** Maximum intensity projection confocal images of A549 cells treated with (+) and without (-) Ac<sub>4</sub>ManNAz (40  $\mu\text{M}$ , 96 h) and treated with either (A) DBCO-pDMAEMA<sub>100</sub>-Fl (FL-100) or (B) DBCO-pDMAEMA<sub>150</sub>-Fl (FL-150) (31.3 – 125  $\mu\text{g.mL}^{-1}$ , 2.5 h). Scale bar = 20  $\mu\text{m}$ . Green = DBCO-pDMAEMA<sub>n</sub>-Fl.



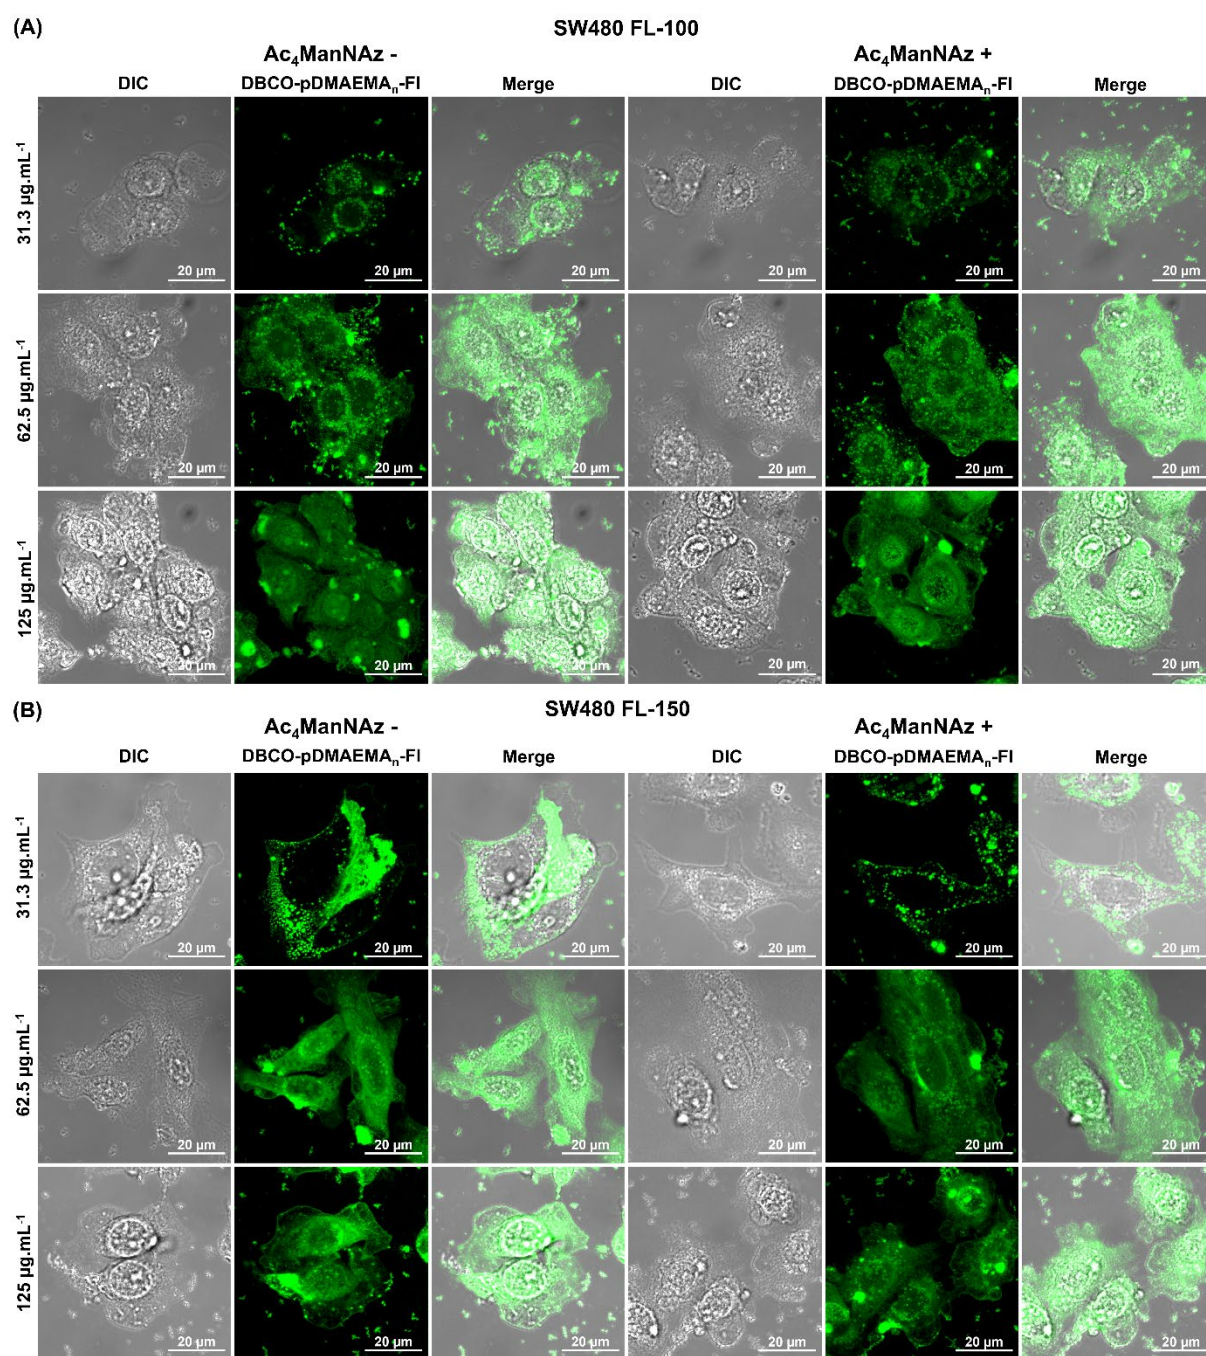

**Figure S34.** Maximum intensity projection confocal images of SW480 cells treated with (+) and without (-) Ac<sub>4</sub>ManNAz (40 µM, 96 h) and treated with either (A) DBCO-pDMAEMA<sub>100</sub>-Fl (FL-100) or (B) DBCO-pDMAEMA<sub>150</sub>-Fl (FL-150) (31.3 – 125 µg.mL<sup>-1</sup>, 2.5 h). Scale bar = 20 µm. Green = DBCO-pDMAEMA<sub>n</sub>-Fl.

## 2.9.2 Membrane Staining Maximum Intensity Projection Images

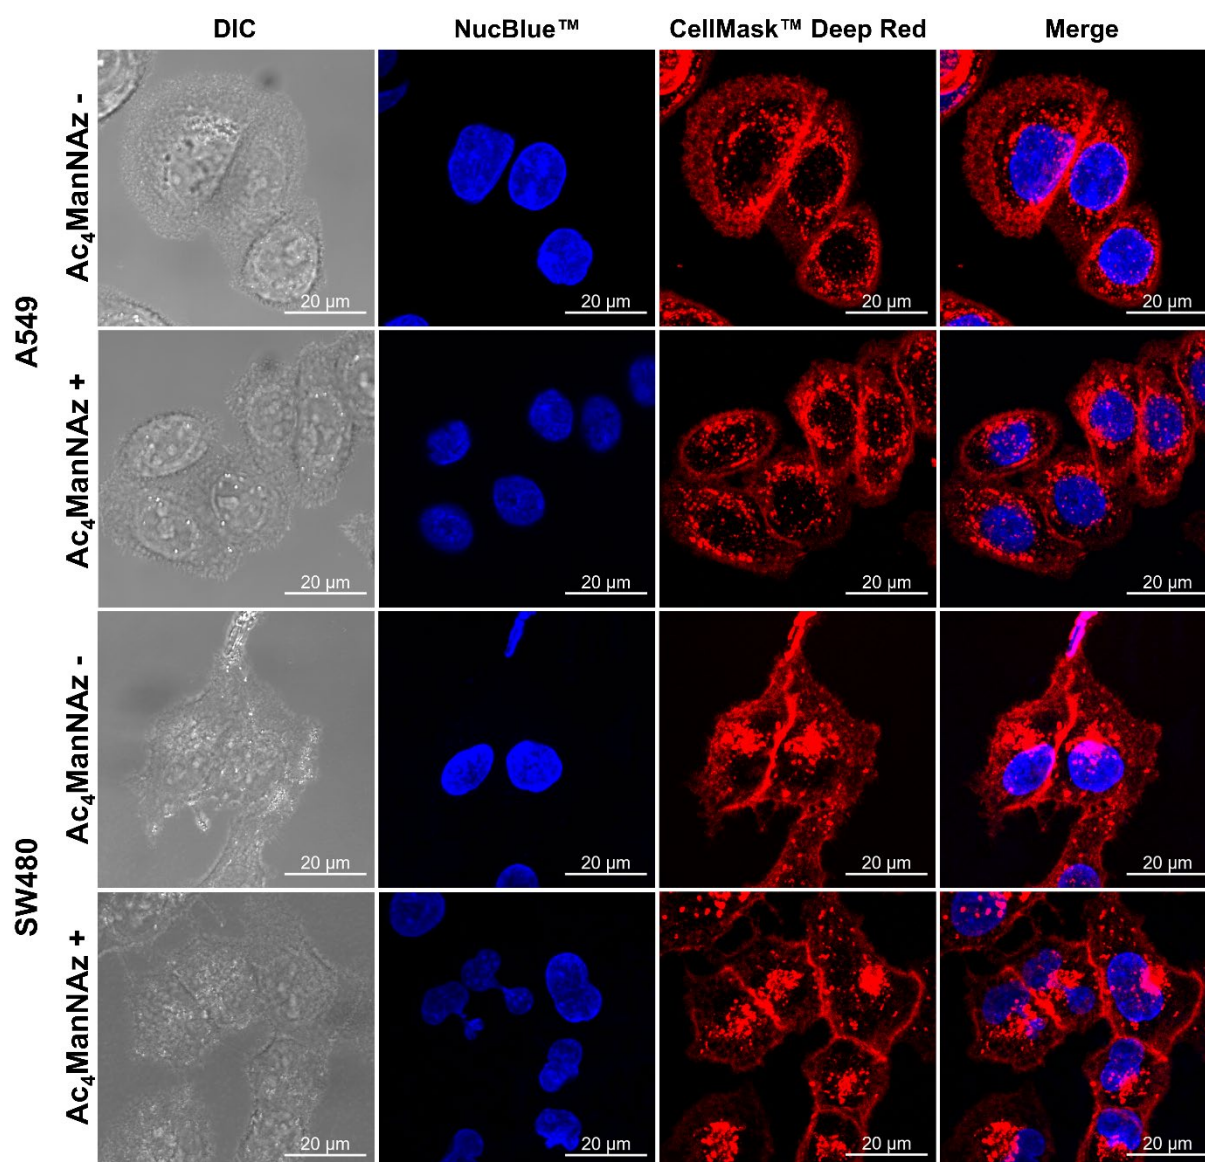

**Figure S35.** Maximum intensity projection confocal images of A549 and SW480 cells treated with (+) and without (-) Ac<sub>4</sub>ManNAz (40 μM, 96 h) and stained with CellMask™ membrane stain (red) and NucBlue™ nuclear stain (blue) as control viable cell images to demonstrate the extent of membrane damage in polymer treated cells. Scale bar = 20 μm.



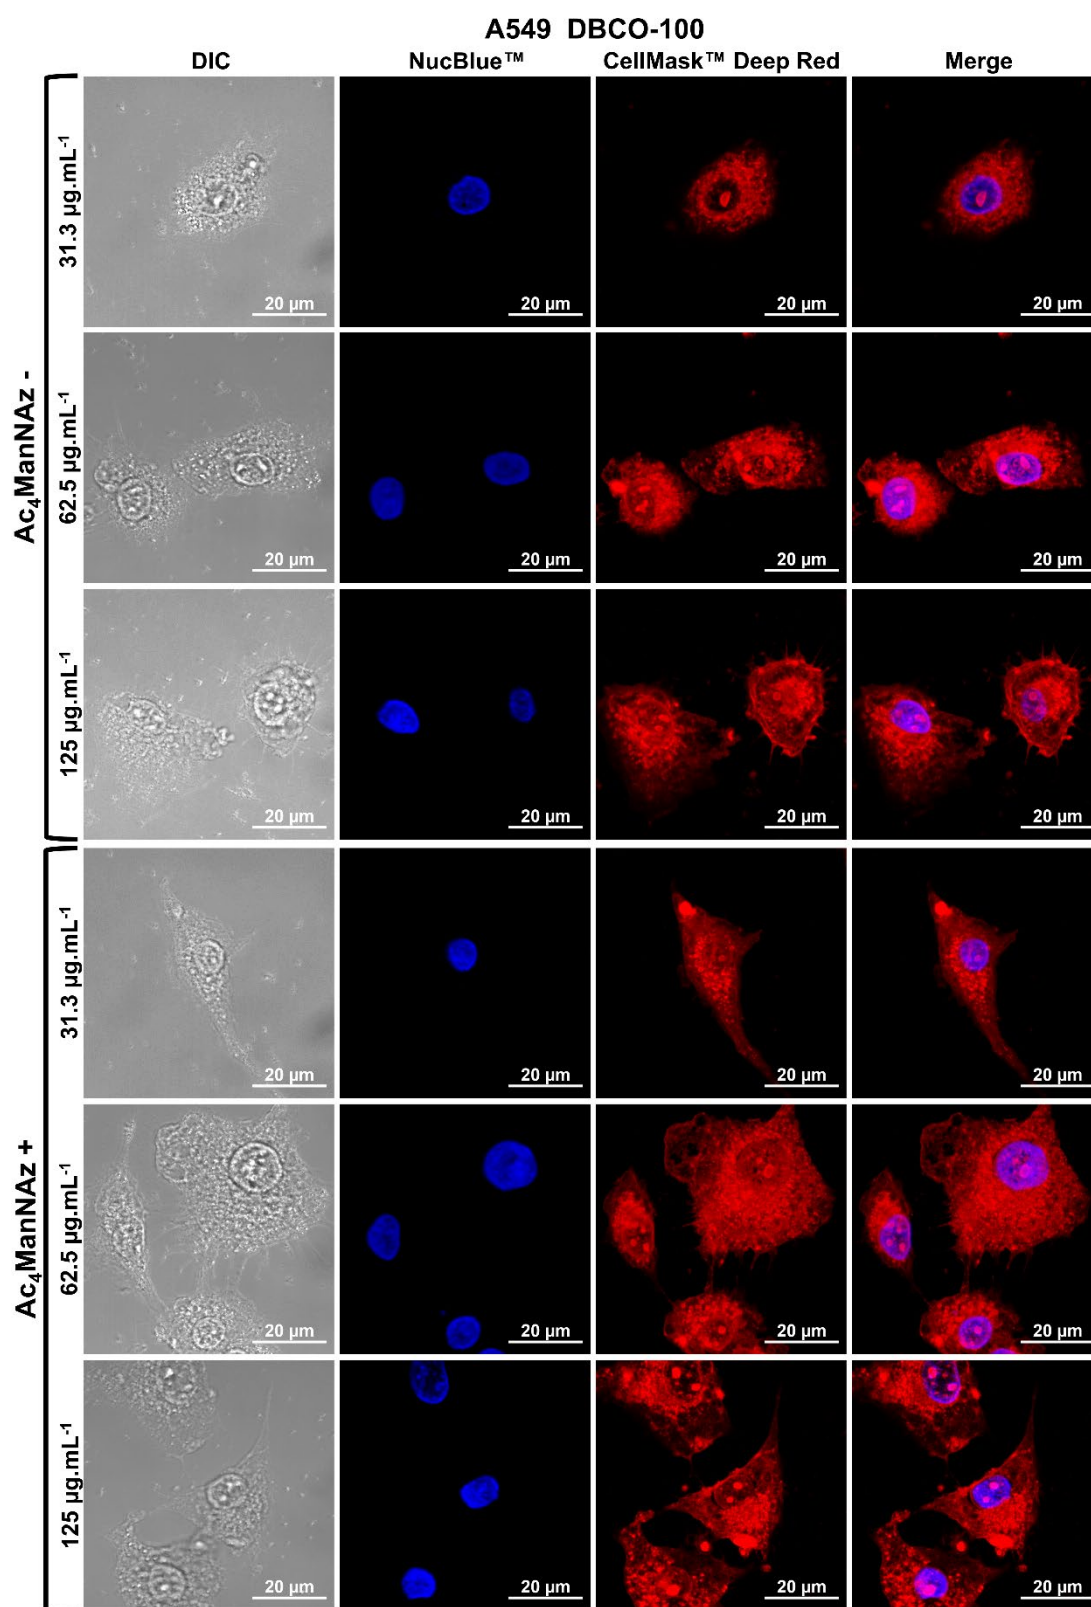

**Figure S36.** Maximum intensity projection confocal images of A549 cells treated with (+) and without (-) Ac<sub>4</sub>ManNAz (40 µM, 96 h) and stained with CellMask™ membrane stain (red) and NucBlue™ nuclear stain (blue) following treatment with DBCO-pDMAEMA<sub>100</sub> (**DBCO-100**, 31.3 – 125 µg.mL<sup>-1</sup>, 2.5 h). Scale bar = 20 µm.



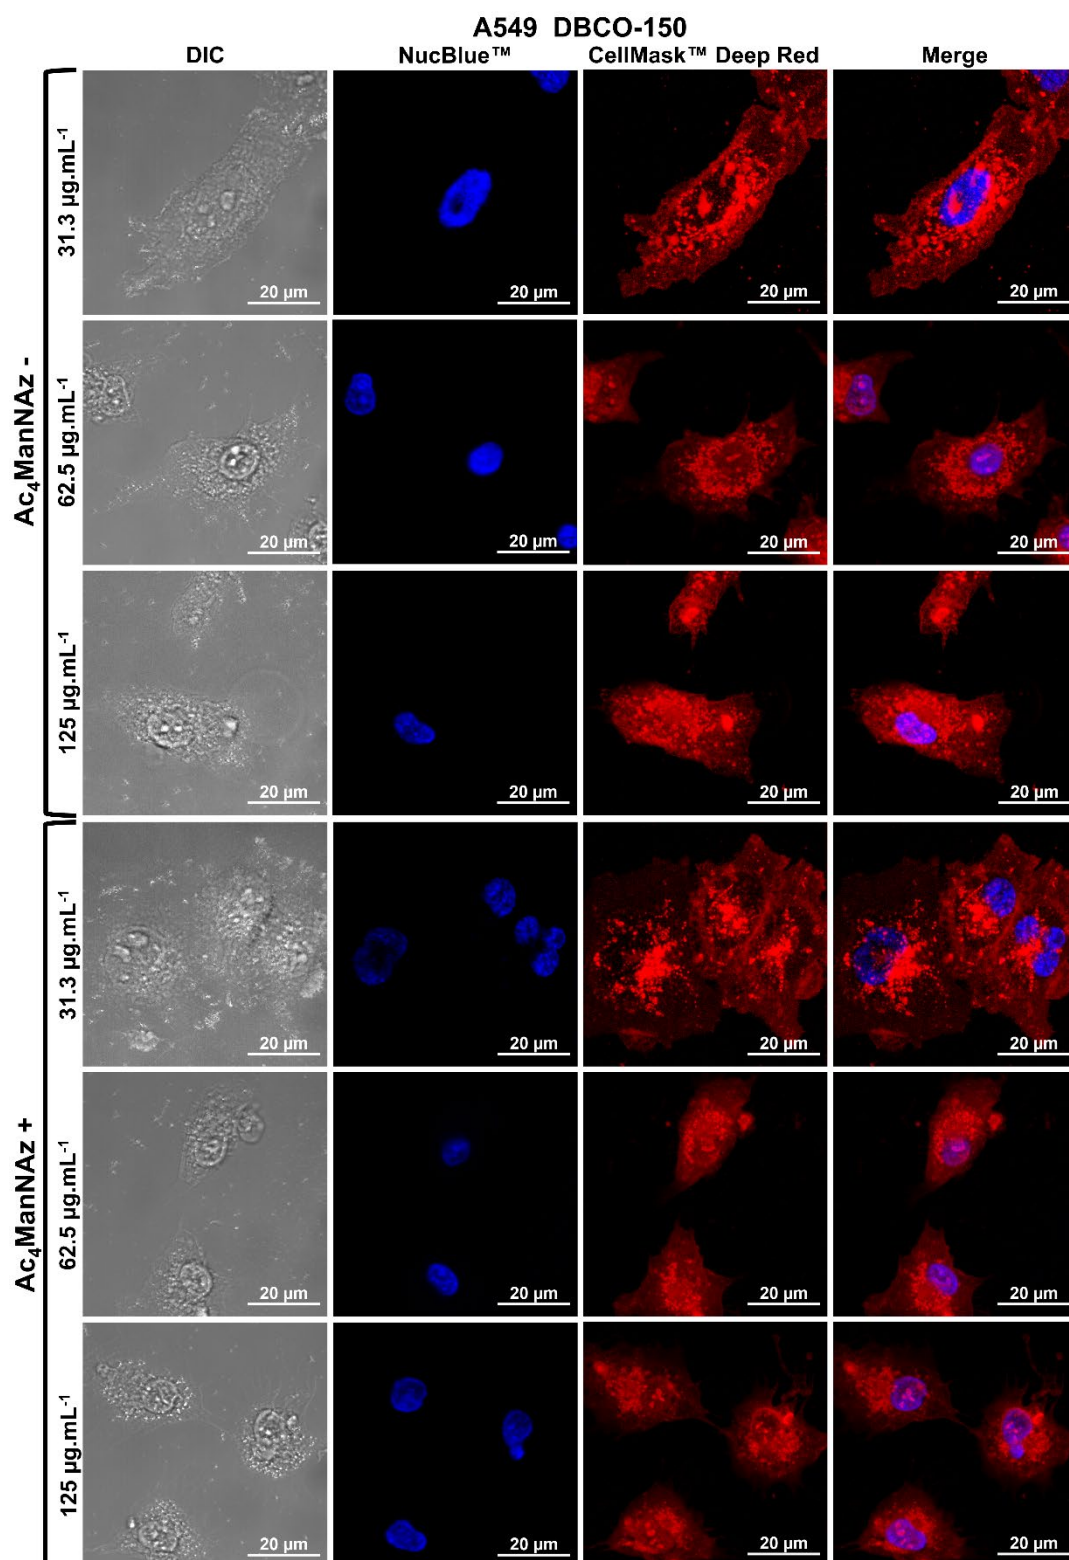

**Figure S37.** Maximum intensity projection confocal images of A549 cells treated with (+) and without (-) Ac<sub>4</sub>ManNAz (40  $\mu\text{M}$ , 96 h) and stained with CellMask™ membrane stain (red) and NucBlue™ nuclear stain (blue) following treatment with DBCO-pDMAEMA<sub>150</sub> (**DBCO-150**, 31.3 – 125  $\mu\text{g.mL}^{-1}$ , 2.5 h). Scale bar = 20  $\mu\text{m}$ .

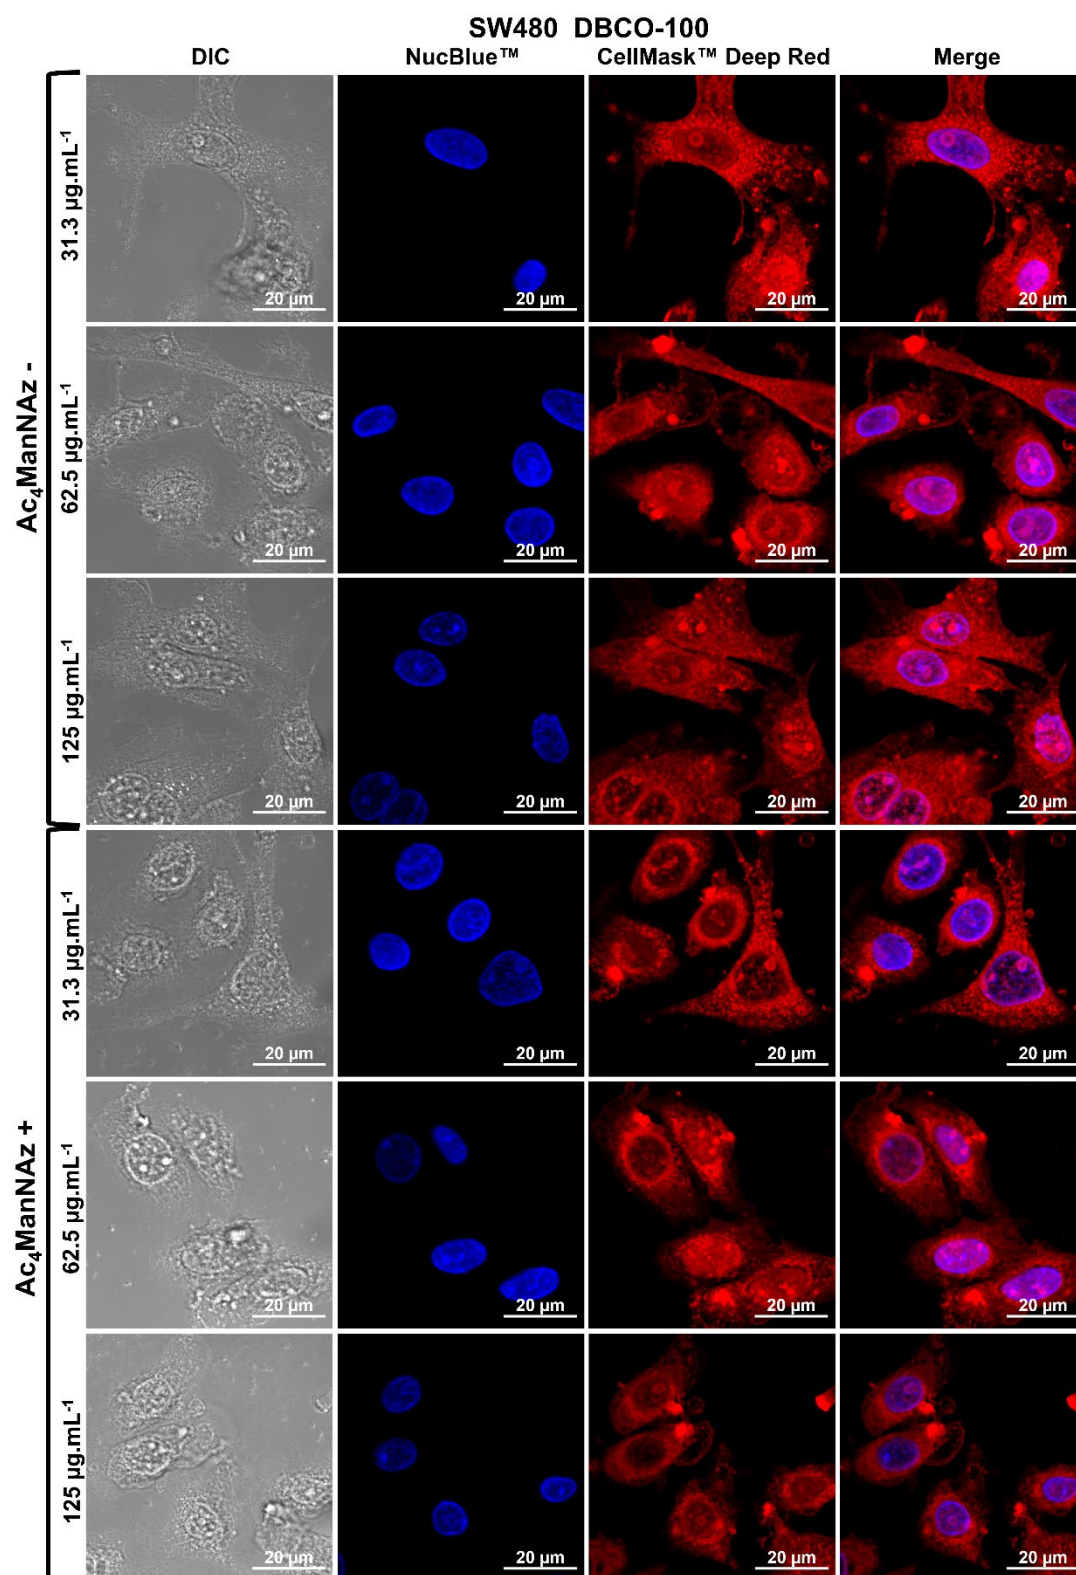

**Figure S38.** Maximum intensity projection confocal images of SW480 cells treated with (+) and without (-) Ac<sub>4</sub>ManNAz (40 µM, 96 h) and stained with CellMask™ membrane stain (red) and NucBlue™ nuclear stain (blue) following treatment with DBCO-pDMAEMA<sub>100</sub> (DBCO-100, 31.3 – 125 µg.mL<sup>-1</sup>, 2.5 h). Scale bar = 20 µm.

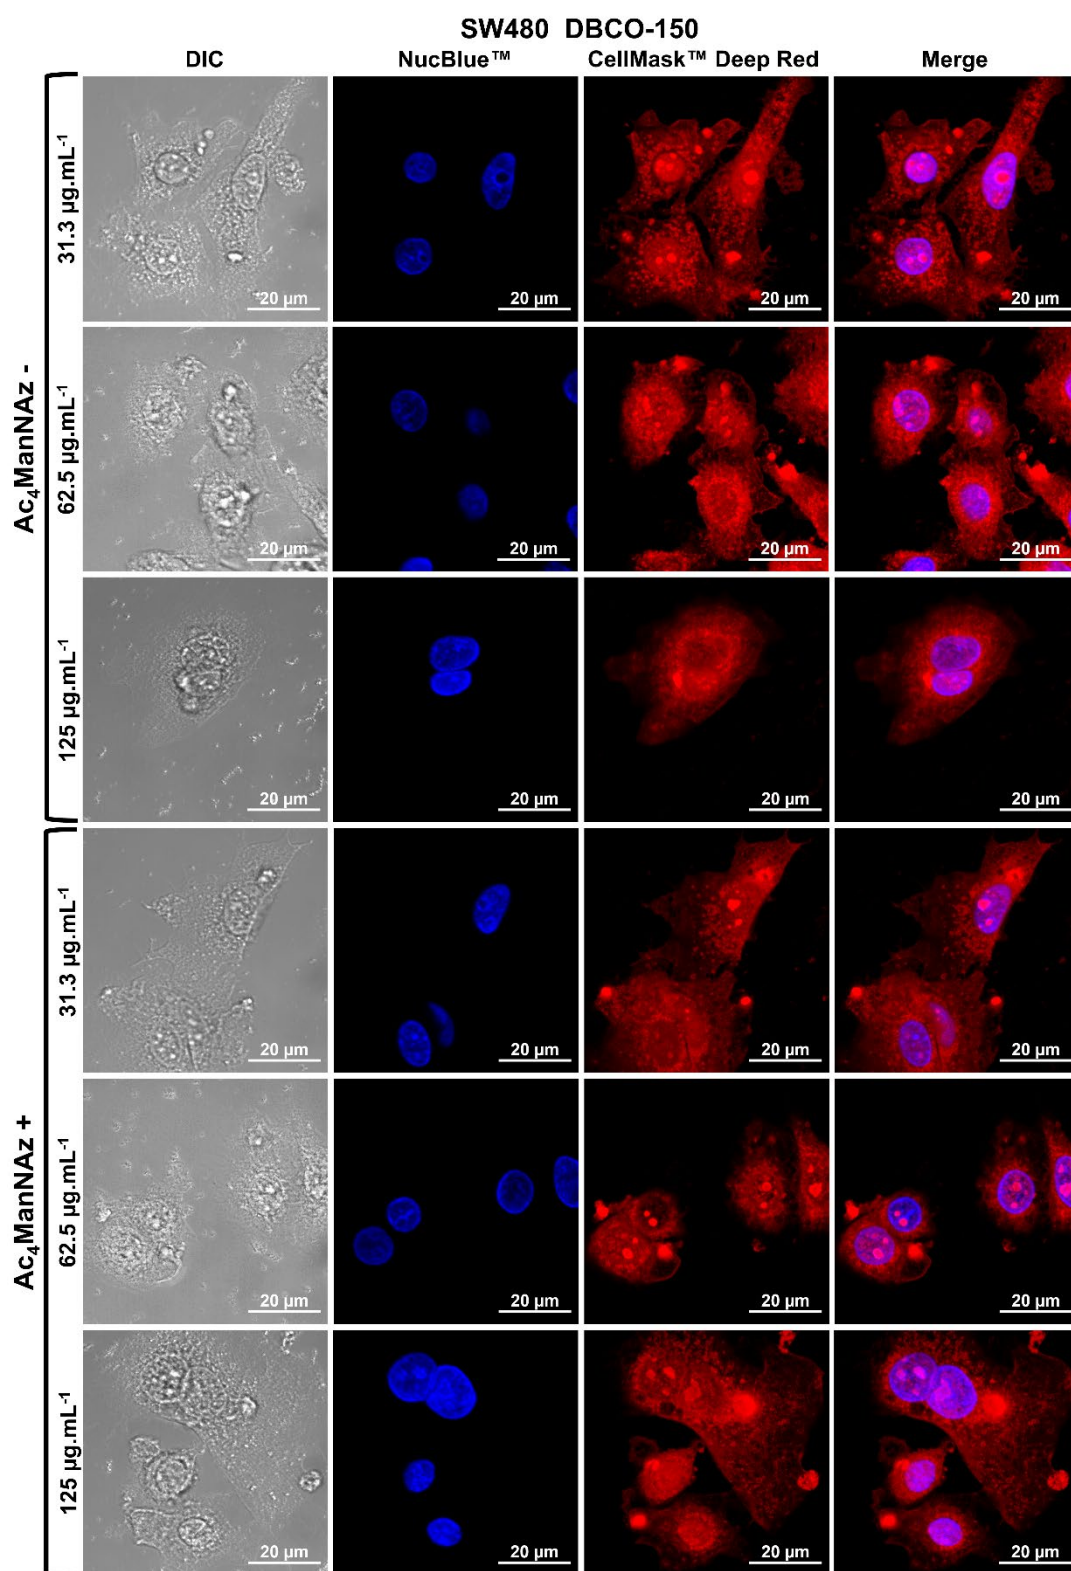

**Figure S39.** Maximum intensity projection confocal images of SW480 cells treated with (+) and without (-) Ac<sub>4</sub>ManNAz (40 µM, 96 h) and stained with CellMask™ membrane stain (red) and NucBlue™ nuclear stain (blue) following treatment with DBCO-pDMAEMA<sub>150</sub> (DBCO-150, 31.3 – 125 µg.mL<sup>-1</sup>, 2.5 h). Scale bar = 20 µm.



### 2.9.3 Summary Confocal Images and 3D Reconstruction

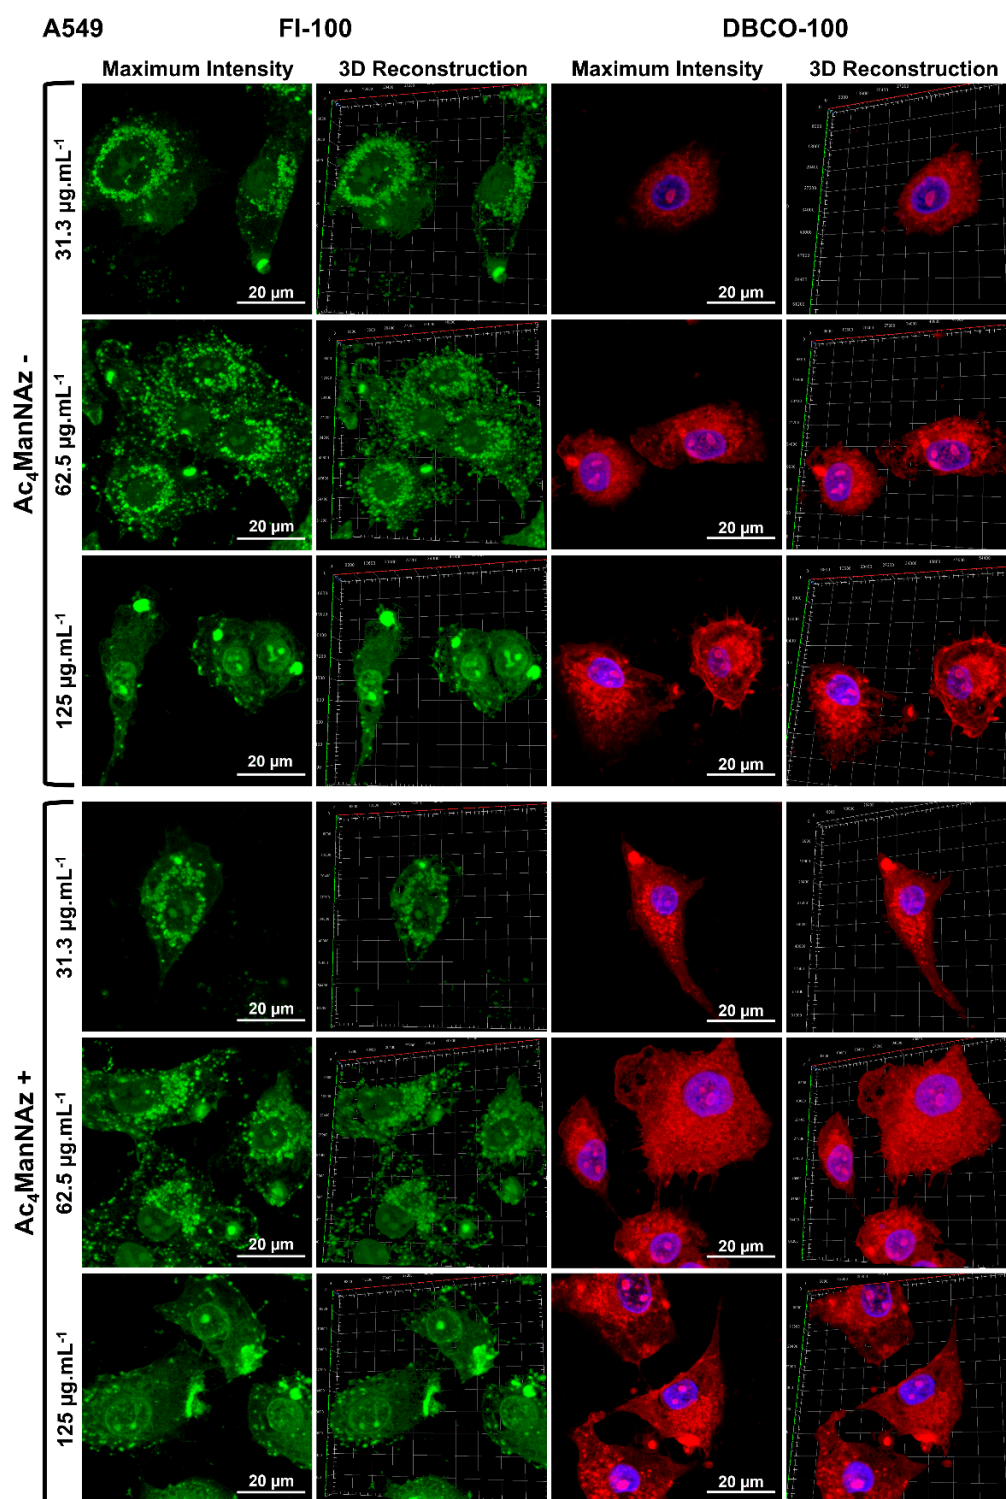

**Figure S40.** Summary maximum intensity projection and 3D reconstructed confocal images of A549 cells treated with (+) and without (-) Ac<sub>4</sub>ManNAz (40 μM, 96 h) and treated with DBCO-pDMAEMA<sub>100</sub>-Fl (FL-100, 31.3 – 125 μg.mL<sup>-1</sup>, 2.5 h, Green). Images were also taken of cells treated with DBCO-pDMAEMA<sub>100</sub> (DBCO-100, 31.3 – 125 μg.mL<sup>-1</sup>, 2.5 h) and stained with CellMask™ membrane stain (red) and NucBlue™ stain (blue). Scale bar = 20 μm.

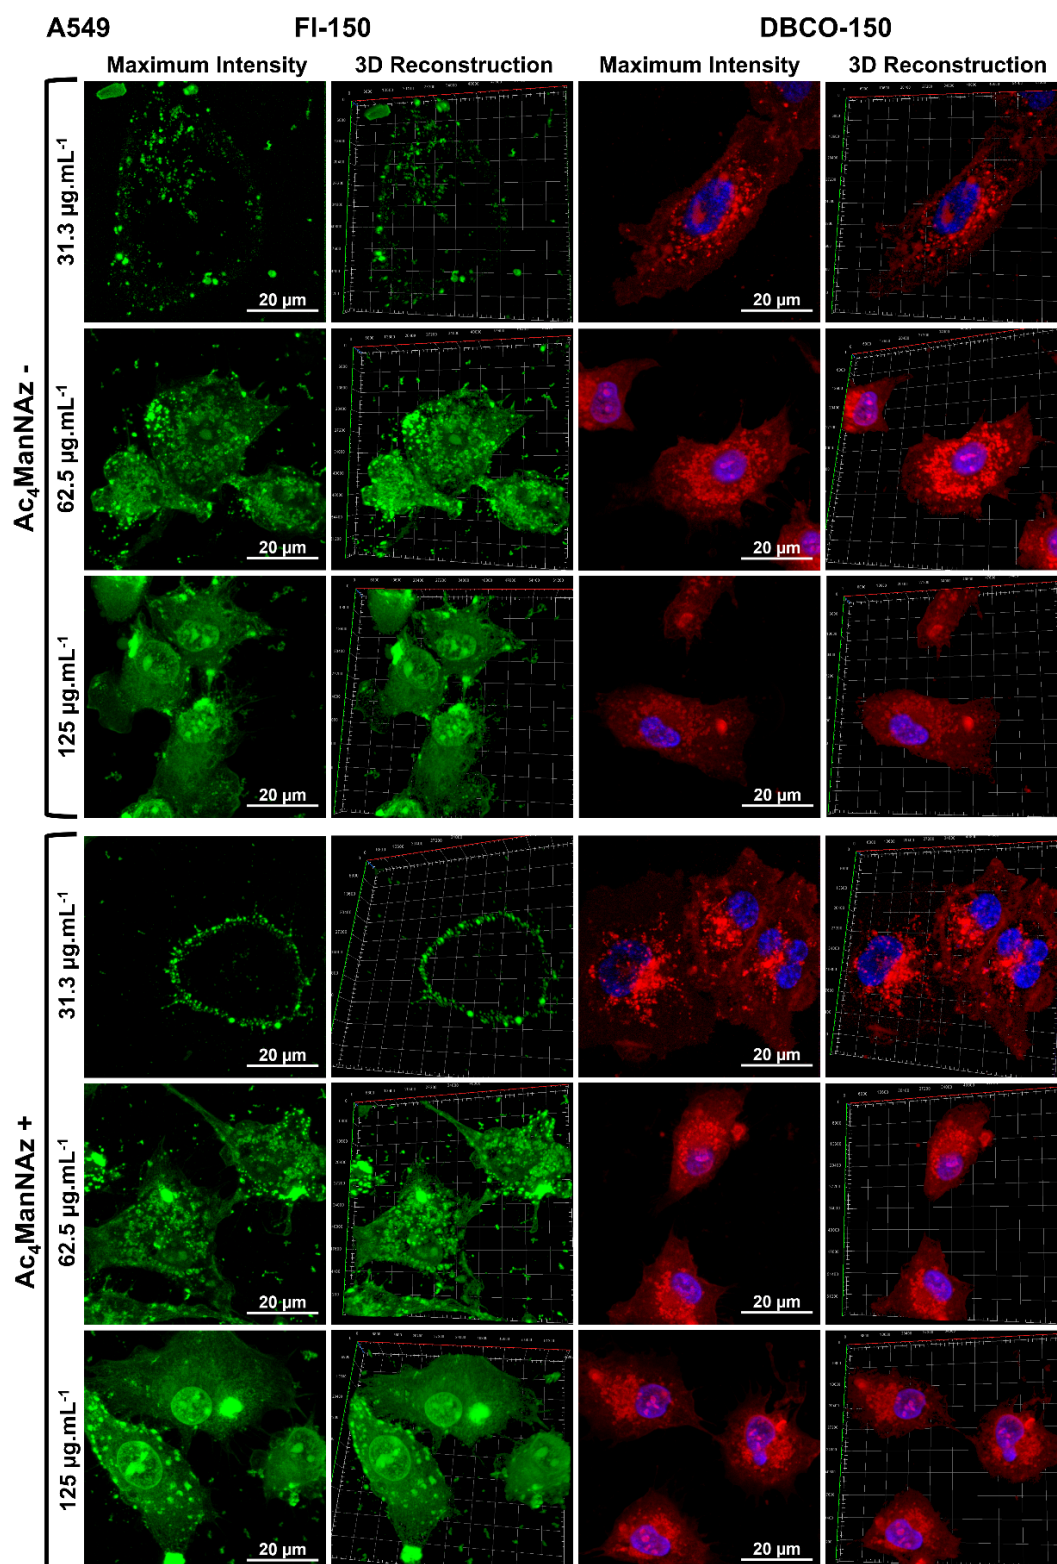

**Figure S41.** Summary maximum intensity projection and 3D reconstructed confocal images of A549 cells treated with (+) and without (-) Ac<sub>4</sub>ManNAz (40  $\mu\text{M}$ , 96 h) and treated with DBCO-pDMAEMA<sub>150</sub>-Fl (FL-150, 31.3 – 125  $\mu\text{g.mL}^{-1}$ , 2.5 h, Green). Images were also taken of cells treated with DBCO-pDMAEMA<sub>150</sub> (DBCO-150, 31.3 – 125  $\mu\text{g.mL}^{-1}$ , 2.5 h) and stained with CellMask<sup>TM</sup> membrane stain (red) and NucBlue<sup>TM</sup> stain (blue). Scale bar = 20  $\mu\text{m}$ .

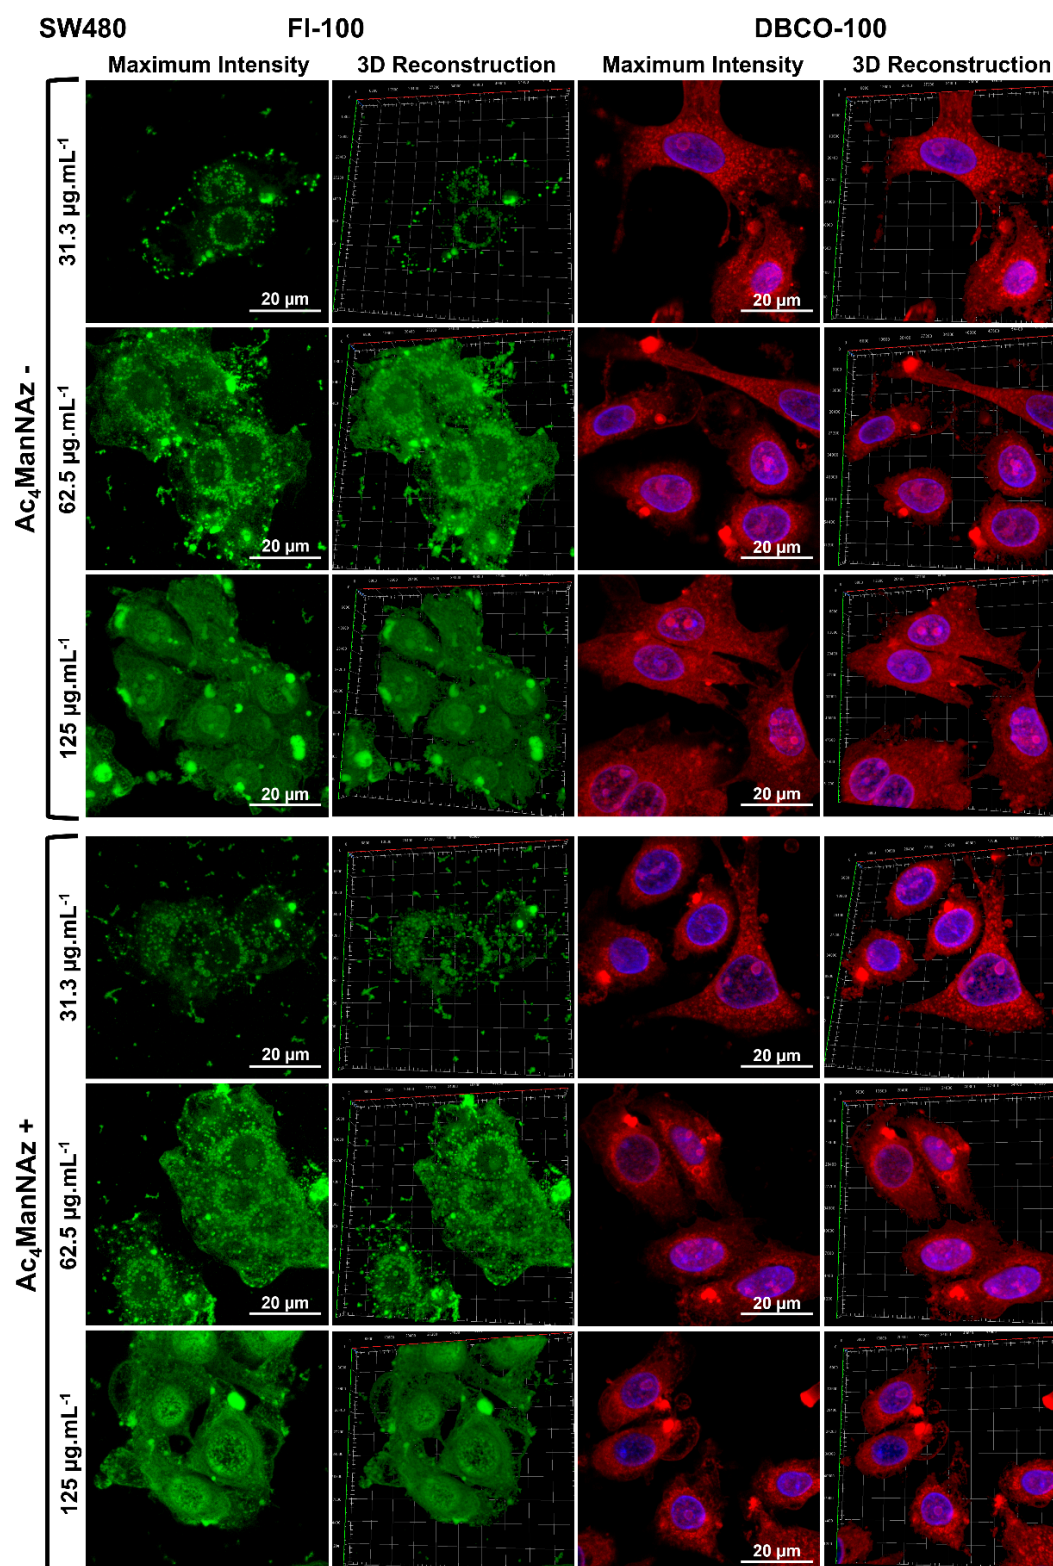

**Figure S42.** Summary maximum intensity projection and 3D reconstructed confocal images of SW480 cells treated with (+) and without (-) Ac<sub>4</sub>ManNAz (40 µM, 96 h) and treated with DBCO-pDMAEMA<sub>100</sub>-Fl (FL-100, 31.3 – 125 µg.mL<sup>-1</sup>, 2.5 h, Green). Images were also taken of cells treated with DBCO-pDMAEMA<sub>100</sub> (DBCO-100, 31.3 – 125 µg.mL<sup>-1</sup>, 2.5 h) and stained with CellMask<sup>TM</sup> membrane stain (red) and NucBlue<sup>TM</sup> stain (blue). Scale bar = 20 µm.



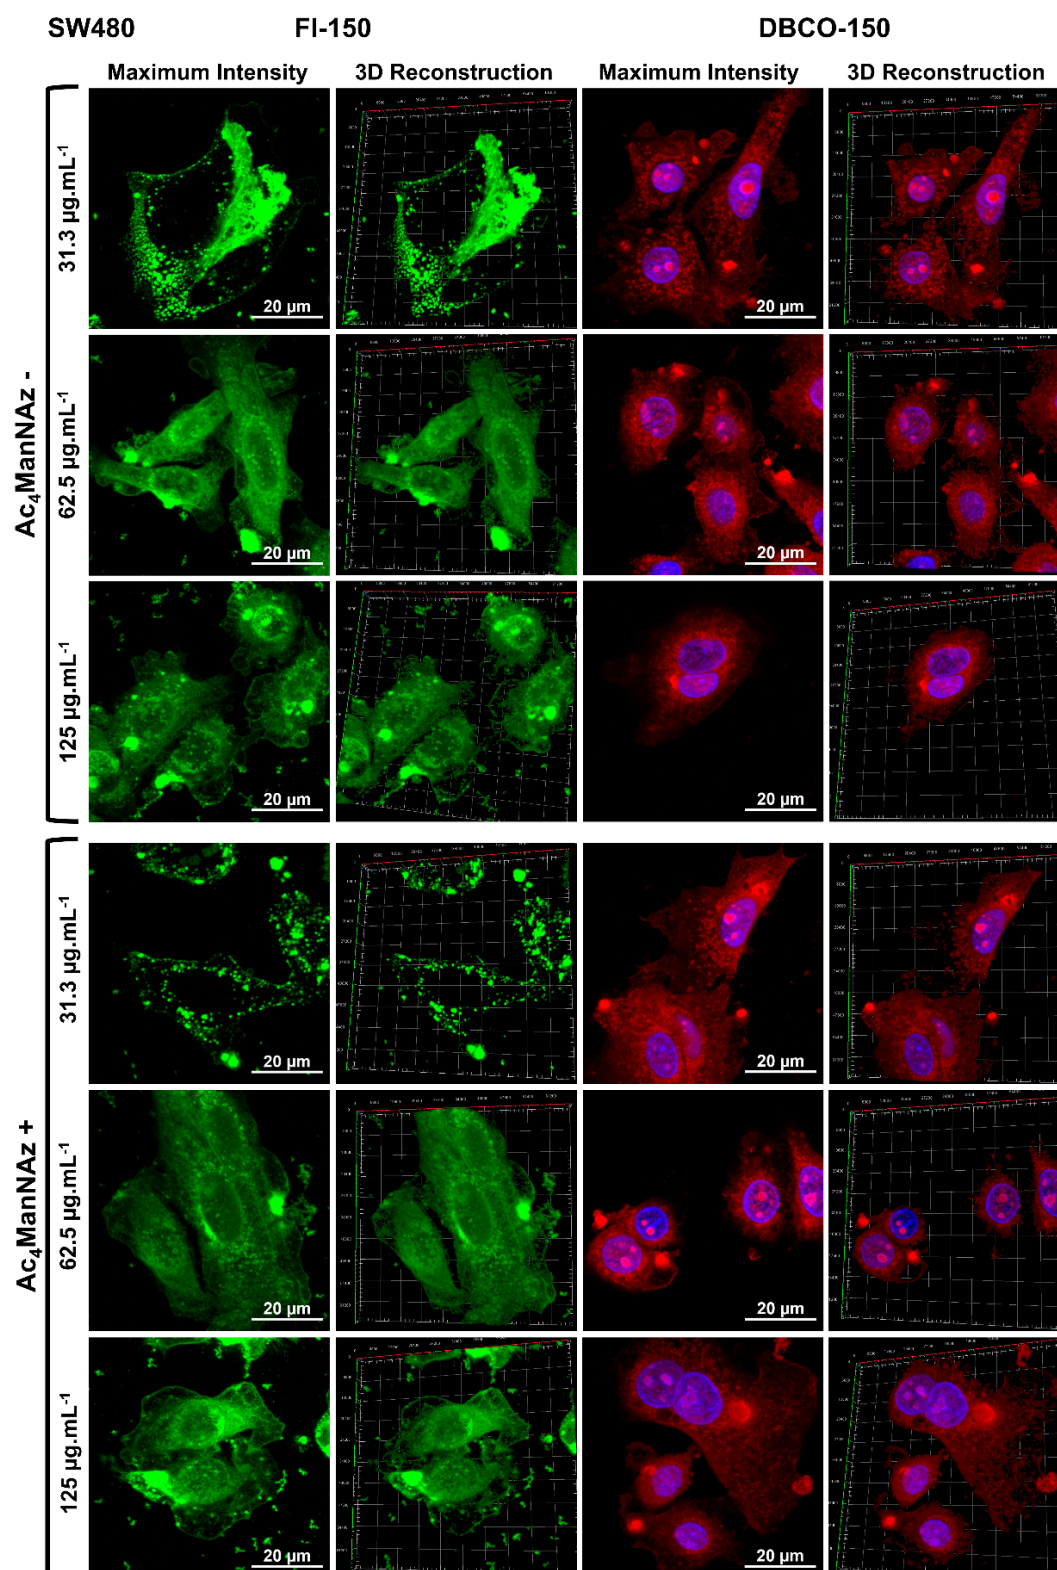

**Figure S43.** Summary maximum intensity projection and 3D reconstructed confocal images of SW480 cells treated with (+) and without (-) Ac<sub>4</sub>ManNAz (40  $\mu\text{M}$ , 96 h) and treated with DBCO-pDMAEMA<sub>150</sub>-Fl (FL-150, 31.3 – 125  $\mu\text{g.mL}^{-1}$ , 2.5 h, Green). Images were also taken of cells treated with DBCO-pDMAEMA<sub>150</sub> (DBCO-150, 31.3 – 125  $\mu\text{g.mL}^{-1}$ , 2.5 h) and stained with CellMask<sup>TM</sup> membrane stain (red) and NucBlue<sup>TM</sup> stain (blue). Scale bar = 20  $\mu\text{m}$ .

## 2.10 Spheroid Proof Azido Labelling

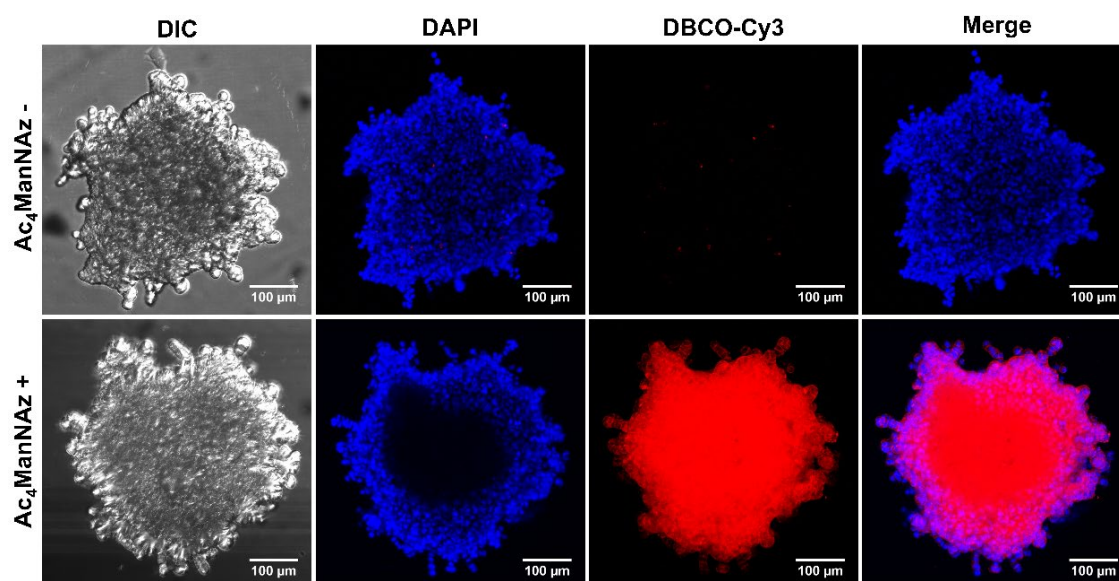

**Figure S44.** Maximum intensity projection confocal images of A549 spheroids formed in the presence (+) and absence (-) of Ac<sub>4</sub>ManNAz (40  $\mu$ M, 96 h) and treated with DBCO-Cy3 (50  $\mu$ M, 2 h, red) and NucBlue<sup>TM</sup> nuclear stain (blue). Scale bar = 100  $\mu$ m.

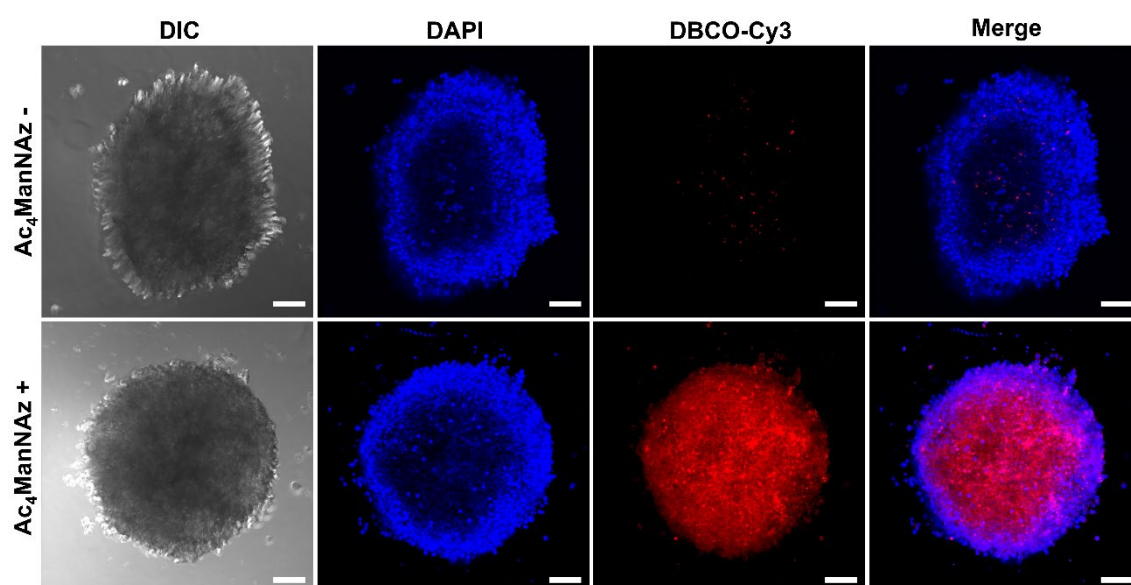

**Figure S45.** Maximum intensity projection confocal images of pre-formed A549 spheroids (72 h) and subsequently treated with (+) or without (-) Ac<sub>4</sub>ManNAz (40  $\mu$ M, 96 h) and treated with DBCO-Cy3 (50  $\mu$ M, 2 h, red) and NucBlue<sup>TM</sup> nuclear stain (blue). Scale bar = 100  $\mu$ m.



## 2.12 Spheroid Cytotoxicity Assays

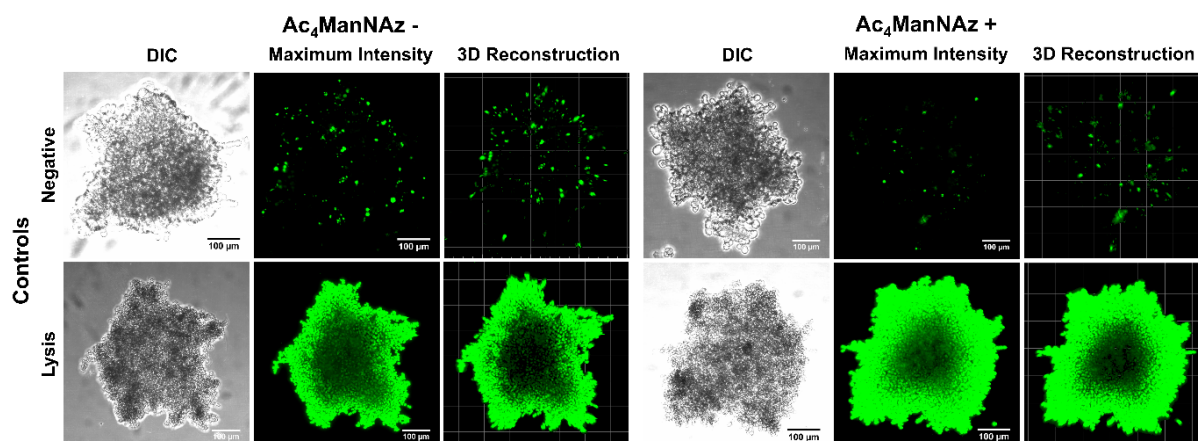

**Figure S46.** *Ac<sub>4</sub>ManNAz spheroid toxicity controls. Spheroids treated with (+) and without (-) Ac<sub>4</sub>ManNAz (40 μM, 96 h) were incubated with media (negative control) or lysis buffer (positive control) for 2.5 h and subsequently stained with CellTox™ green. Scale bar = 100 μm.*

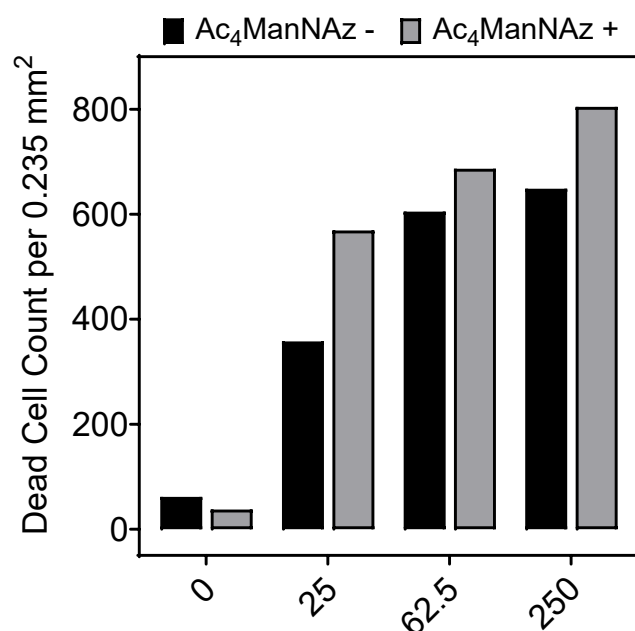

**Figure S47.** *Spheroids treated with (+) and without (-) Ac<sub>4</sub>ManNAz (40 μM, 96 h) and treated with DBCO-pDMAEMA<sub>100</sub> (0 – 250 μg.ml<sup>-1</sup>, 3 h) were stained with CellTox™ green to test for toxicity, confocal imaged (Figure S44) and the number of dead cells per average spheroid area (0.235 mm<sup>2</sup>) was calculated and plotted.*

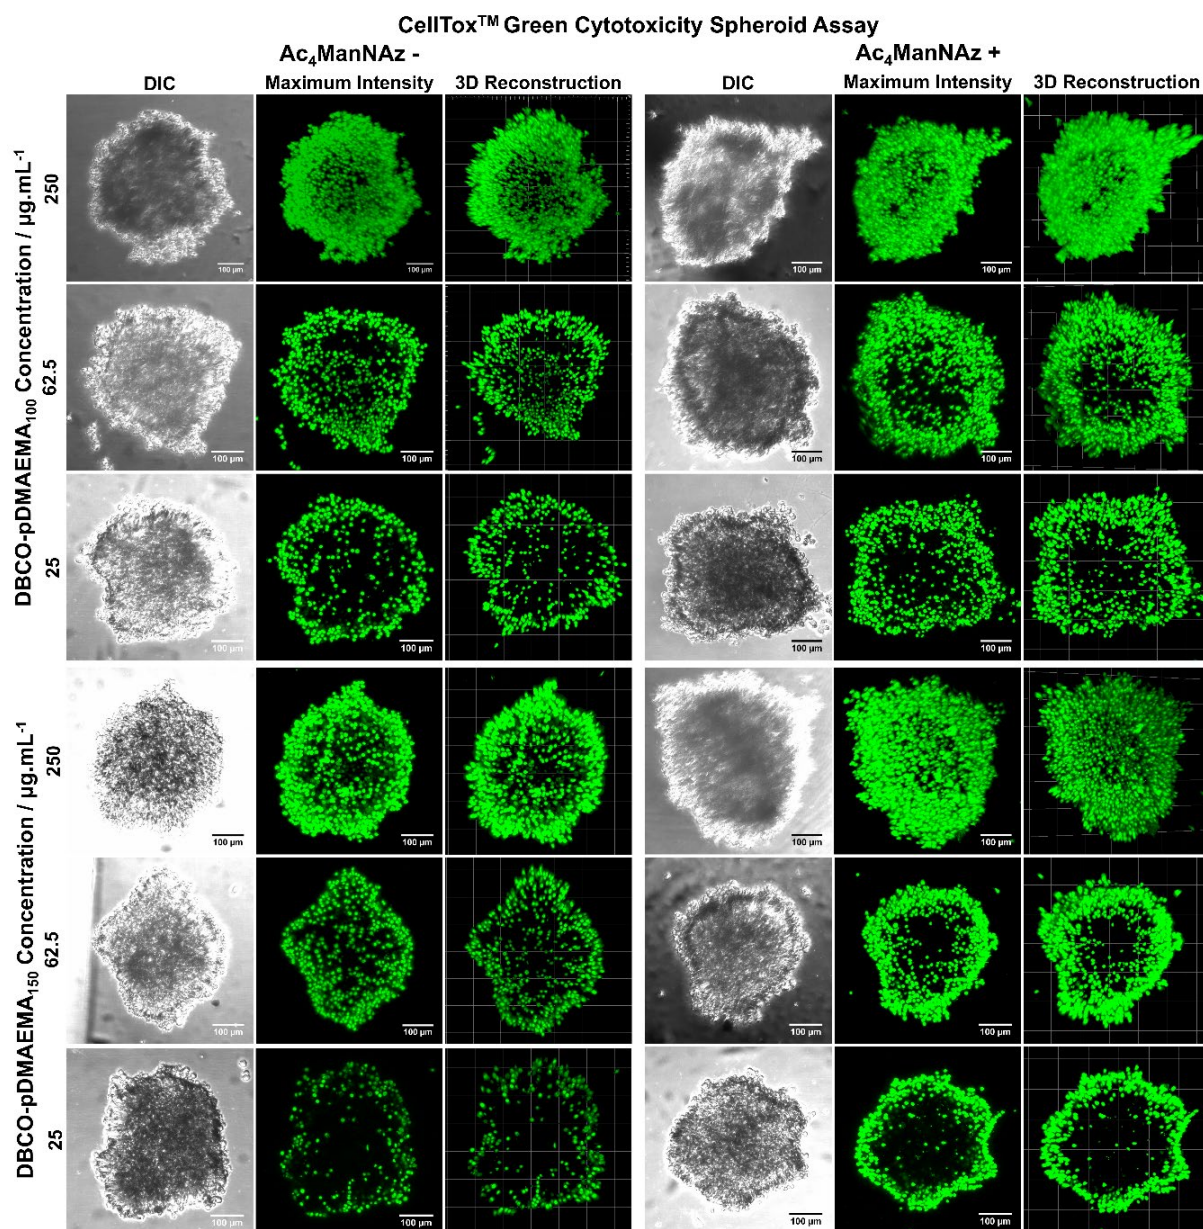

**Figure S48.** Spheroids treated with (+) and without (-) Ac<sub>4</sub>ManNAz (40  $\mu\text{M}$ , 96 h) and treated with DBCO-pDMAEMA<sub>100/150</sub> (25 – 250  $\mu\text{g.mL}^{-1}$ , 3 h) were stained with CellTox™ green to test for toxicity. Scale bar = 100  $\mu\text{m}$ .

### 3.0 References

1. Richards, S. J., Otten, L. & Gibson, M. I. Glycosylated gold nanoparticle libraries for label-free multiplexed lectin biosensing. *J. Mater. Chem. B* **4**, 3046–3053 (2016).
2. Tomás, R. M. F., Martyn, B., Bailey, T. L. & Gibson, M. I. Engineering Cell Surfaces by Covalent Grafting of Synthetic Polymers to Metabolically-Labeled Glycans. *ACS Macro Lett.* **7**, 1289–1294 (2018).
3. Tomás, R. M. F. & Gibson, M. I. Optimization and Stability of Cell-Polymer Hybrids Obtained by ‘clicking’ Synthetic Polymers to Metabolically Labeled Cell Surface Glycans. *Biomacromolecules* **20**, 2726–2736 (2019).
